# Supplementary material for: Using Ambulatory Care Sensitive Conditions to Assess Primary Health Care Performance during Disasters: A Systematic Review
Source: MDPI journal article supplement (doi:10.3390/ijerph19159193), 2022-07-27
Supplement: s1 [file s1]

|                        | Chronic obstructive pulmonary disease/Asthma | Congestive heart failure | Arterial Hypertension | Diabetes mellitus | Angina | Dehydration and electrolytes disturbances | Urinary Infections | Iron-deficiency anemia | Gastrointestinal bleeding | Nutritional deficiencies | Seizures | Sever Ear/Nose/Throat infections | Cellulitis | Pelvic Inflamm. Disease | Dental conditions | Gangrene | Influenza | Pneumonia |
|------------------------|----------------------------------------------|--------------------------|-----------------------|-------------------|--------|-------------------------------------------|--------------------|------------------------|---------------------------|--------------------------|----------|----------------------------------|------------|-------------------------|-------------------|----------|-----------|-----------|
| Leuchter et al., 2021  | x                                            | x                        | x                     | x                 |        |                                           |                    |                        |                           |                          |          |                                  |            |                         |                   |          |           | x         |
| Runkle et al., 2013    | x                                            | x                        | x                     | x                 | x      | x                                         | x                  |                        |                           | x                        | x        | x                                | x          | x                       | x                 |          |           | x         |
| Sasabuchi et al., 2017 | x                                            | x                        | x                     | x                 | x      | x                                         | x                  | x                      | x                         | x                        | x        | x                                | x          | x                       | x                 | x        | x         | x         |
| Sasabuchi et al. 2018  | x                                            | x                        | x                     | x                 | x      | x                                         | x                  | x                      | x                         | x                        | x        | x                                | x          | x                       | x                 | x        | x         | x         |
| Huang et al. 2009      | x                                            | x                        | x                     | x                 |        |                                           |                    |                        |                           |                          |          |                                  |            |                         |                   |          |           |           |
| Runkle et al, 2012     | x                                            | x                        | x                     | x                 | x      | x                                         | x                  |                        |                           | x                        | x        | x                                | x          | x                       | x                 |          |           | x         |
| Rennert—May 2021       | x                                            | x                        | x                     | x                 | x      |                                           |                    |                        |                           |                          | x        |                                  |            |                         |                   |          |           | x         |
| Wright 2021            | x                                            | x                        | x                     | x                 | x      |                                           | x                  |                        |                           |                          | x        |                                  |            |                         |                   |          |           | x         |
| Becker 2022            | x                                            | x                        | x                     | x                 |        |                                           | x                  |                        |                           |                          | x        |                                  |            |                         |                   |          |           | x         |

File S4. ACSCs used in the reviewed articles
