# Supplementary material for: Using Ambulatory Care Sensitive Conditions to Assess Primary Health Care Performance during Disasters: A Systematic Review
Source: MDPI journal article supplement (doi:10.3390/ijerph19159193), 2022-07-27
Supplement: s1 [file s1]

**File S1:** Search Queries for PubMed, Web Of Science and Scopus

|                |                                                                                                                                                                                                                                                                                                                                                                                                                                                                                                                                                                                                                                                                                                                                                                                                                                                                                                                                                                                                                                                                                                                                                                                                                                                                                                                                                       |
|----------------|-------------------------------------------------------------------------------------------------------------------------------------------------------------------------------------------------------------------------------------------------------------------------------------------------------------------------------------------------------------------------------------------------------------------------------------------------------------------------------------------------------------------------------------------------------------------------------------------------------------------------------------------------------------------------------------------------------------------------------------------------------------------------------------------------------------------------------------------------------------------------------------------------------------------------------------------------------------------------------------------------------------------------------------------------------------------------------------------------------------------------------------------------------------------------------------------------------------------------------------------------------------------------------------------------------------------------------------------------------|
| PubMed         | ("ambulatory care sensitive condition*" [Title/Abstract] OR "ambulatory care-sensitive condition*" [Title/Abstract] OR "ACSC*" [Title/Abstract] OR "avoidable hospitalization*" [Title/Abstract] OR "avoidable hospitalisation*" [Title/Abstract] OR "avoidable hospital admission*" [Title/Abstract] OR "preventable hospitalization*" [Title/Abstract] OR "preventable hospitalisation*" [Title/Abstract] OR "preventable health condition*" [Title/Abstract] OR "preventable hospital admission*" [Title/Abstract] OR "preventable condition*" [Title/Abstract] OR "avoidable emergency admission*" [Title/Abstract] OR "preventable emergency admission*" [Title/Abstract] OR "avoidable health conditions*" [Title/Abstract]) AND ((disaster[MeSH Terms]) OR ("disaster*" [Title/Abstract] OR "emergency" [Title/Abstract] OR "emergencies" [Title/Abstract] OR "crisis" [Title/Abstract] OR "crises" [Title/Abstract] OR "catastrophe" [Title/Abstract] OR "covid*" [Title/Abstract] OR "calamity*" [Title/Abstract] OR "flood*" [Title/Abstract] OR "tsunami" [Title/Abstract] OR "earthquake*" [Title/Abstract] OR "storm*" [Title/Abstract] OR "pandemic*" [Title/Abstract] OR "epidemic*" [Title/Abstract] OR "cyclone*" [Title/Abstract] OR "heatwave*" [Title/Abstract] OR "heat wave*" [Title/Abstract] OR "drought*" [Title/Abstract])) |
| Web Of Science | ("ambulatory care sensitive condition*" OR "ambulatory care-sensitive condition*" OR "ACSC*" OR "avoidable hospitalization*" OR "avoidable hospitalisation*" OR "avoidable hospital admission*" OR "preventable hospitalization*" OR "preventable hospitalisation*" OR "preventable health condition*" OR "preventable hospital admission*" OR "preventable condition*" OR "avoidable emergency admission*" OR "preventable emergency admission*" OR "avoidable health conditions*") AND ("disaster*" OR "emergency" OR "emergencies" OR "crisis" OR "crises" OR "catastrophe" OR "covid*" OR "calamity*" OR "flood*" OR "tsunami" OR "earthquake*" OR "storm*" OR "pandemic*" OR "epidemic*" OR "cyclone*" OR "heatwave*" OR "heat wave*" OR "drought*")                                                                                                                                                                                                                                                                                                                                                                                                                                                                                                                                                                                             |
| SCOPUS         | ( TITLE-ABS-KEY ( "ambulatory care sensitive condition*" OR "ambulatory care-sensitive condition*" OR "ACSC*" OR "avoidable hospitalization*" OR "avoidable hospitalisation*" OR "avoidable hospital admission*" OR "preventable hospitalization*" OR "preventable hospitalisation*" OR "preventable health condition*" OR "preventable hospital admission*" OR "preventable condition*" OR "avoidable emergency admission*" OR "preventable emergency admission*" OR "avoidable health conditions*" ) AND TITLE-ABS-KEY ( "disaster*" OR "emergency" OR "emergencies" OR "crisis" OR "crises" OR "catastrophe" OR "covid*" OR "calamity*" OR "flood*" OR "tsunami" OR "earthquake*" OR "storm*" OR "pandemic*" OR "epidemic*" OR "cyclone*" OR "heatwave*" OR "heat wave*" OR "drought*" ) )                                                                                                                                                                                                                                                                                                                                                                                                                                                                                                                                                         |
