# Supplementary material for: Using Ambulatory Care Sensitive Conditions to Assess Primary Health Care Performance during Disasters: A Systematic Review
Source: MDPI journal article supplement (doi:10.3390/ijerph19159193), 2022-07-27
Supplement: s1 [file s1]

| Author                     | Year | Country | Disaster Type  | Data sources/population                                                                                                                                                                        | Objectives                                                                                                                                                                                                                | Results                                                                                                                                                                                                                                                                                                                                                                                                                                                                                                                                                                                                                  | Limitations                                                                                                                                                                                                                                                                                                                                                                                                            |
|----------------------------|------|---------|----------------|------------------------------------------------------------------------------------------------------------------------------------------------------------------------------------------------|---------------------------------------------------------------------------------------------------------------------------------------------------------------------------------------------------------------------------|--------------------------------------------------------------------------------------------------------------------------------------------------------------------------------------------------------------------------------------------------------------------------------------------------------------------------------------------------------------------------------------------------------------------------------------------------------------------------------------------------------------------------------------------------------------------------------------------------------------------------|------------------------------------------------------------------------------------------------------------------------------------------------------------------------------------------------------------------------------------------------------------------------------------------------------------------------------------------------------------------------------------------------------------------------|
| Sasabuchi Y, et al [18]    | 2018 | Japan   | Earthquake     | N=7921 admissions for vaccine-preventable ACSCs<br>N= 18763 for acute ACSCs<br>N= 85436 for chronic ACSCs                                                                                      | To investigate the impact of the 2016 Kumamoto earthquakes on ACSCs, using an administrative database from Kumamoto prefecture                                                                                            | -In the first 7 days after the earthquakes all ACSCs in 2016 increased and then decreased, while number of ACSC admissions did not change in 2013-2015.<br>-Difference-in-differences analysis within 7 days showed that admissions increased for vaccine-preventable, acute and chronic ACSCs.                                                                                                                                                                                                                                                                                                                          | -No information related to degree of damage of infrastructures<br>-Differences between the population included in the present study and the general population<br>-Validity of ACSC in Japanese clinical setting needs to be further evaluated<br>-Difference in admission policy between hospitals<br>-ACSC are not a direct measure of the impaired of access to primary care.                                       |
| Huang, Y.-T., et al. [19]  | 2009 | Taiwan  | SARS outbreak  | N= 120.330 hospitalizations                                                                                                                                                                    | To explore the effect of the SARS outbreak on hospitalization from chronic ACSCs after the SARS outbreak<br><br>01-03/2003 → pre-SARS period<br>04-06/2003 → SARS<br>07-09/2003 → post-SARS-1<br>10-12/2003 → post-SARS-2 | -ACSC hospitalizations were reduced during the SARS period<br>-In the post-1 phase hospitalizations were still reduced with exception of diabetes and arterial hypertension whose hospitalization rates increased after SARS.<br>-Actual hosp. rates were lower than predicted (except for diabetes and arterial hypertension)                                                                                                                                                                                                                                                                                           | -No comparison of changes in ACSCs admissions among areas with different impacts of SARS<br>-No correlation analysis between aggregate outpatient and inpatient statistics, because the health seeking behaviour might have varied among conditions with different severity and likelihood of acquiring SARS at health facilities                                                                                      |
| Sasabuchi Y, et al [17]    | 2017 | Japan   | Earthquake     | N= 952 127 patients                                                                                                                                                                            | To investigate the influence of the GEJE on long term health conditions in terms of ACSCs using a national inpatient database in Japan                                                                                    | -Admission for acute ACSCs significantly increased in the disaster area compared with other areas at 16-24 months after the Great East Japan Earthquake                                                                                                                                                                                                                                                                                                                                                                                                                                                                  | -No measure of outpatient care or of the baseline health and socioeconomic status of the residents<br>-Validity of ACSC in Japanese clinical setting needs to be further evaluated<br>-Difference in admission policy between hospitals<br>-Unable to track whether patients admitted to other hospital after discharge<br>-“Out of pocket” payments for healthcare charges were exempted during the time of the study |
| Runkle JR, et al [13]      | 2013 | US      | Chlorine spill | All Medicaid patients admitted to hospitals/ED between 18 and 64                                                                                                                               | To estimate unmet PHC needs after a disaster                                                                                                                                                                              | -Improved access to timely and effective primary care in the 24 months post-disaster<br>-PHC provided an alternate site of preventive and primary care in the 24 months after the disaster                                                                                                                                                                                                                                                                                                                                                                                                                               | -Small sample size<br>-ACSC rates not analyzed separately<br>-Data not generalizable                                                                                                                                                                                                                                                                                                                                   |
| Runkle JD, et al [14]      | 2012 | US      | Chlorine spill | All Medicaid beneficiaries, representative of medically vulnerable individuals                                                                                                                 | To see whether ACSC rates among vulnerable subpopulations are sensitive to the impact of a disaster                                                                                                                       | -Significant increase in post—disaster hospital ACSC visits<br>-Significant decline in post-disaster ED discharges<br>-Elevated ACSC rates signal PHC issues that existed before the disaster<br>-Disaster exacerbates disparities in access<br>-Excess demand on the health system promotes discontinuity of care and disrupts access to care for vulnerable subgroups during recovery                                                                                                                                                                                                                                  | -Fallacies in the design of the study (Secondary group not suitable)<br>-Possible confounding factors (health seeking behaviour, disease severity trends)                                                                                                                                                                                                                                                              |
| Leuchter RK, et al. [12]   | 2021 | US      | COVID-19       | N= 904 patients without COVID-19 admitted in internal medicine at a tertiary hospital                                                                                                          | To measure the number and change in potentially avoidable hospitalizations during COVID-19: 6 months in 2019 versus 6 months in 2020                                                                                      | -Reduced ACSC rates during COVID<br>-African-American were more hospitalized                                                                                                                                                                                                                                                                                                                                                                                                                                                                                                                                             | -No incorporation of known medical and nonmedical contributors to health disparities (comorbidities)<br>-Assumption of a common population pool of patients between the 2 time periods<br>-Small sample size from a single health system<br>-No explanation of underlying causes of system inefficiencies<br>-Portion of pneumonia might be COVID-19+                                                                  |
| Rennert-May E. et al. [20] | 2021 | Canada  | COVID-19       | Population of Alberta ED visits + hospital admission rates (diagnoses based on ICD-10)                                                                                                         | To measure changes in number of hospital admissions and ED visits pre-and post-COVID-19; 7 months in 2019 versus 7 months in 2020                                                                                         | -Number of admissions significantly lower during COVID both for medical and surgical cases<br>-Number of ED visits for ACSCs decreased significantly post-COVID-19 public health measures<br>-Increased in-hospital mortality for medical admissions, decreased in-hospital mortality for surgical cases<br>-ED visits increase/decrease by number of COVID-19 cases, suggesting that population avoids ED when cases of COVID rise due to concern of transmission                                                                                                                                                       | -No data present of mortality outside of in-hospital rates<br>-Short time period<br>-No assessment of ambulatory care utilization                                                                                                                                                                                                                                                                                      |
| Wright B. et al. [16]      | 2021 | US      | COVID-19       | Retrospective cross-sectional analysis of Medicaid beneficiaries between Jan 2018 and August 2020                                                                                              | To understand healthcare use and costs of individuals who were newly enrolled to Medicaid just prior to the pandemic versus those who were newly enrolled during the first Covid pandemic.                                | -New Medicaid enrollees during COVID: reductions in the probability of having an ED visit, a potentially avoidable hospitalization, a primary care visit, a dental visit, compared to new enrollees pre-COVID<br>-Elderly had more probability to experience a potentially avoidable hospitalization compared to younger people<br>-Women were less likely to have a potentially avoidable hospitalization, more likely to have an ED visit, and less likely to have a PHC visit<br>-Higher probability of health care use and costs among rural versus urban enrollees                                                  | -Only 6 months assessed<br>-Not generalizable                                                                                                                                                                                                                                                                                                                                                                          |
| Becker N. et al. [15]      | 2022 | US      | COVID-19       | Pre-pandemic: N=1.240.409 adults (>18) enrolled in a commercial health maintenance organisation<br>Pandemic: N=1.206.361 adults (>18) enrolled in a commercial health maintenance organisation | To describe trends in hospital admissions for ACSCs in the pre-pandemic period compared with the pandemic period.                                                                                                         | -RR of having any ACSC hospitalisation in the pandemic period vs the pre-pandemic period was 0.72 (95% CI, 0.69-0.76; P < .001). This decrease was slightly larger in magnitude than the overall reduction in non-ACSC, non-COVID-19 hosp. rates.<br>-Large reductions were found in the RR of respiratory-related ACSC hospitalizations (aRR, 0.54; 95% CI, 0.50-0.58; P < .001), with non-statistically significant reductions in diabetes-related ACSCs (aRR, 0.91; 95% CI, 0.83-1.00; P = .05) and a statistically significant reduction in all other ACSC hospitalizations (aRR, 0.79; 95% CI, 0.74-0.85; P < .001) | -Sample included a commercially insured population of adults who were not necessarily representative of the entire US population<br>-Population under study is overall younger and healthier, as the overall ACSC hospitalisation rate is below the national average<br>-Analysis does not include important covariates, such as race and ethnicity, language spoken, income                                           |

File S3: Characteristics of the studies included
