# Supplementary material for: Using Ambulatory Care Sensitive Conditions to Assess Primary Health Care Performance during Disasters: A Systematic Review
Source: Int J Environ Res Public Health. 2022 Jul 27;19(15):9193. doi: 10.3390/ijerph19159193 (PMC9367847; doi:10.3390/ijerph19159193)
Supplement: Supplementary file 1 [file ijerph-19-09193-s001.zip]

Archive with 4 entries (4 files):
- File S1.pdf
- File S2.xlsx
- File S3.pdf
- File S4.pdf
