# Supplementary material for: Using Ambulatory Care Sensitive Conditions to Assess Primary Health Care Performance during Disasters: A Systematic Review
Source: Int J Environ Res Public Health. 2022 Jul 27;19(15):9193. doi: 10.3390/ijerph19159193 (PMC9367847; doi:10.3390/ijerph19159193)
Supplement: Supplementary file 1 [file ijerph-19-09193-s001.zip › File S2.xlsx]

## Sheet: Articles retrieved 
Title	Authors	Journal/Book	Publication Year	DOI	Database
[Acute complicated and uncomplicated pyelonephritis in the emergency department: process-of-care indicators and outcomes]	Delgado Vicente M, Lecaroz Agara MC, Barrios Andrés JL, Canut Blasco A.	Emergencias	2017		PubMed
[Assessment of a chronic care program in Gerona (CRONIGICAT)]	Quesada Sabaté M, Canet Ponsa M, Avellana Revuelta E, Rodriguez Requejo S, German Rebull F, Balló Peña E.	Aten Primaria	2014	10.1016/S0212-6567(14)70062-9	PubMed
[Characteristics of avoidable hospitalization in Spain]	Alfonso Sánchez JL, Sentís Vilalta J, Blasco Perepérez S, Martínez Martínez I.	Med Clin (Barc)	2004	10.1016/s0025-7753(04)74342-0	PubMed
[Considerations on avoidable hospitalizations by heart failure. Related variables]	Garcia Sarasola A, Herrera Mateo S, Rizzi M, Alquézar Arbé A.	Rev Esp Salud Publica	2016		PubMed
[Diabetes mellitus in Mexico. Status of the epidemic]	Hernández-Ávila M, Gutiérrez JP, Reynoso-Noverón N.	Salud Publica Mex	2013		PubMed
[EMANet: A regional network for health services research in emergency and acute medicine]	Schmiedhofer M, Inhoff T, Krobisch V, Schenk L, Rose M, Holzinger F, Keil T, Müller-Werdan U, Günster C, Möckel M; für die EMANet-Studygroup.	Z Evid Fortbild Qual Gesundhwes	2018	10.1016/j.zefq.2018.07.009	PubMed
[Estimating air quality change-associated health benefits by reducing PM10 in Bogotá]	Ortiz-Durán EY, Rojas-Roa NY.	Rev Salud Publica (Bogota)	2013		PubMed
[Evaluating health care of the immigrant population in Italy through indicators of a national monitoring system]	Di Napoli A, Rossi A, Battisti L, Cacciani L, Caranci N, Cernigliaro A, De Giorgi M, Fanolla A, Fateh-Moghadam P, Franchini D, Lazzeretti M, Melani C, Mininni M, Mondo L, Recine M, Rosaia EM, Rusciani R, Scondotto S, Silvestri C, Trappolini E, Petrelli A.	Epidemiol Prev	2020	10.19191/EP20.5-6.S1.P085.077	PubMed
[Immigrants' health and socioeconomic inequalities of overall population residing in Italy evaluated through the Italian network of Longitudinal Metropolitan Studies]	Petrelli A, Di Napoli A, Agabiti N, Barbieri G, Bardin A, Bargagli AM, Biggeri A, Bonvicini L, Broccoli S, Cacciani L, Canova C, Caranci N, Costa G, Dalla Zuanna T, Davoli M, Di Girolamo C, Ferracin E, Giorgi Rossi P, Grisotto L, Marino C, Pacelli B, Simonato L, Spadea T, Strippoli E, Zengarini N.	Epidemiol Prev	2019	10.19191/EP19.5-6.S1.112	PubMed
[Integrated and structured clinical networks. A new model of pro-active management of chronicity and sustainability]	Desideri E, Grisillo D, Sandroni M.	Ig Sanita Pubbl	2020		PubMed
[Many people over 80 years had been able to get care outside the hospital]	Myredal A, Mauritzon I, Blom M, Ivarsson K.	Lakartidningen	2016		PubMed
[Prehospital emergency care in Mexico City: the opportunities of the healthcare system]	Pinet LM.	Salud Publica Mex	2005	10.1590/s0036-36342005000100010	PubMed
[Underestimated impact of antibiotic misuse in outpatient children]	Cassir N, Di Marco JN, Poujol A, Lagier JC.	Arch Pediatr	2012	10.1016/j.arcped.2012.03.012	PubMed
24/7 Registered Nurse Staffing Coverage in Saskatchewan Nursing Homes and Acute Hospital Use	McGregor, MJ; Murphy, JM; Poss, JW; McGrail, KM; Kuramoto, L; Huang, HC; Bryan, S	CANADIAN JOURNAL ON AGING-REVUE CANADIENNE DU VIEILLISSEMENT	2015	10.1017/S0714980815000434	WOS
A Case Report of an Emergency Hypertensive Episode During Trastuzumab Therapy	Pacheco Mendes A, Nogueira J, Mendes A, Cochicho J, Lavadinho I.	Cureus	2021	10.7759/cureus.17015	PubMed
A Case Report of an Emergency Hypertensive Episode During Trastuzumab Therapy	Mendes, AP; Nogueira, J; Mendes, A; Cochicho, J; Lavadinho, I	CUREUS	2021	10.7759/cureus.17015	WOS
A critical assessment of the out-of-hospital trauma triage guidelines for physiologic abnormality	Newgard CD, Rudser K, Hedges JR, Kerby JD, Stiell IG, Davis DP, Morrison LJ, Bulger E, Terndrup T, Minei JP, Bardarson B, Emerson S; ROC Investigators.	J Trauma	2010	10.1097/TA.0b013e3181ae20c9	PubMed
A critical assessment of the out-of-hospital trauma triage guidelines for physiologic abnormality	Newgard, C.D., Rudser, K., Hedges, J.R., Kerby, J.D., Stiell, I.G., Davis, D.P., Morrison, L.J., Bulger, E., Terndrup, T., Minei, J.P., Bardarson, B., Emerson, S.	Journal of Trauma - Injury, Infection and Critical Care	2010	10.1097/TA.0b013e3181ae20c9	Scopus
A Critical Assessment of the Out-of-Hospital Trauma Triage Guidelines for Physiologic Abnormality	Newgard, CD; Rudser, K; Hedges, JR; Kerby, JD; Stiell, IG; Davis, DP; Morrison, LJ; Bulger, E; Terndrup, T; Minei, JP; Bardarson, B; Emerson, S	JOURNAL OF TRAUMA-INJURY INFECTION AND CRITICAL CARE	2010	10.1097/TA.0b013e3181ae20c9	WOS
A longitudinal evaluation of the effect of Medi-Cal managed care on supplemental security income and aid to families with dependent children enrollees in two California counties	Lo Sasso AT, Freund DA.	Med Care	2000	10.1097/00005650-200009000-00007	PubMed
A longitudinal evaluation of the effect of medi-cal managed care on supplemental security income and aid to families with dependent children enrollees in two California counties	Lo Sasso, A.T., Freund, D.A.	Medical Care	2000	10.1097/00005650-200009000-00007	Scopus
A longitudinal evaluation of the effect of medi-cal managed care on supplemental security income and aid to families with dependent children enrollees in two California counties	Lo Sasso, AT; Freund, DA	MEDICAL CARE	2000	10.1097/00005650-200009000-00007	WOS
A Longitudinal Examination of Continuity of Care and Avoidable Hospitalization Evidence From a Universal Coverage Health Care System	Cheng, SH; Chen, CC; Hou, YF	ARCHIVES OF INTERNAL MEDICINE	2010	10.1001/archinternmed.2010.340	WOS
A multisite assessment of the American College of Surgeons Committee on Trauma field triage decision scheme for identifying seriously injured children and adults	Newgard CD, Zive D, Holmes JF, Bulger EM, Staudenmayer K, Liao M, Rea T, Hsia RY, Wang NE, Fleischman R, Jui J, Mann NC, Haukoos JS, Sporer KA, Gubler KD, Hedges JR; WESTRN investigators.	J Am Coll Surg	2011	10.1016/j.jamcollsurg.2011.09.012	PubMed
A multisite assessment of the American College of Surgeons Committee on trauma field triage decision scheme for identifying seriously injured children and adults	Newgard, C.D., Zive, D., Holmes, J.F., Bulger, E.M., Staudenmayer, K., Liao, M., Rea, T., Hsia, R.Y., Wang, N.E., Fleischman, R., Jui, J., Mann, N.C., Haukoos, J.S., Sporer, K.A., Gubler, K.D., Hedges, J.R.	Journal of the American College of Surgeons	2011	10.1016/j.jamcollsurg.2011.09.012	Scopus
A Multisite Assessment of the American College of Surgeons Committee on Trauma Field Triage Decision Scheme for Identifying Seriously Injured Children and Adults	Newgard, CD; Zive, D; Holmes, JF; Bulger, EM; Staudenmayer, K; Liao, M; Rea, T; Hsia, RY; Wang, NE; Fleischman, R; Jui, J; Mann, NC; Haukoos, JS; Sporer, KA; Gubler, KD; Hedges, JR	JOURNAL OF THE AMERICAN COLLEGE OF SURGEONS	2011	10.1016/j.jamcollsurg.2011.09.012	WOS
A patient-reported spectrum of adverse health care experiences: Harms, unnecessary care, medication illness, and low health confidence	Wasson, J.H.	Journal of Ambulatory Care Management	2013	10.1097/JAC.0b013e3182955b22	Scopus
A preliminary study of the relationship between general practice care and hospitalisation using a diabetes register, CARDIAB	Comino, EJ; Tran, DT; Taggart, JR; Liaw, ST; Ruscoe, W; Snow, JM; Harris, MF	AUSTRALIAN HEALTH REVIEW	2013	10.1071/AH12175	WOS
A regional health collaborative formed By NewYork-Presbyterian aims to improve the health of a largely Hispanic community	Carrillo JE, Shekhani NS, Deland EL, Fleck EM, Mucaria J, Guimento R, Kaplan S, Polf WA, Carrillo VA, Pardes H, Corwin SJ.	Health Aff (Millwood)	2011	10.1377/hlthaff.2011.0635	PubMed
A regional health collaborative formed by Newyork-Presbyterian aims to improve the health of a largely Hispanic community	Carrillo, J.E., Shekhani, N.S., Deland, E.L., Fleck, E.M., Mucaria, J., Guimento, R., Kaplan, S., Polf, W.A., Carrillo, V.A., Pardes, H., Corwin, S.J.	Health Affairs	2011	10.1377/hlthaff.2011.0635	Scopus
A Regional Health Collaborative Formed By NewYork-Presbyterian Aims To Improve The Health Of A Largely Hispanic Community	Carrillo, JE; Shekhani, NS; Deland, EL; Fleck, EM; Mucaria, J; Guimento, R; Kaplan, S; Polf, WA; Carrillo, VA; Pardes, H; Corwin, SJ	HEALTH AFFAIRS	2011	10.1377/hlthaff.2011.0635	WOS
A system-wide approach to explaining variation in potentially avoidable emergency admissions: national ecological study	O'Cathain A, Knowles E, Maheswaran R, Pearson T, Turner J, Hirst E, Goodacre S, Nicholl J.	BMJ Qual Saf	2014	10.1136/bmjqs-2013-002003	PubMed
A system-wide approach to explaining variation in potentially avoidable emergency admissions: National ecological study	O'Cathain, A., Knowles, E., Maheswaran, R., Pearson, T., Turner, J., Hirst, E., Goodacre, S., Nicholl, J.	BMJ Quality and Safety	2014	10.1136/bmjqs-2013-002003	Scopus
A system-wide approach to explaining variation in potentially avoidable emergency admissions: national ecological study	O'Cathain, A; Knowles, E; Maheswaran, R; Pearson, T; Turner, J; Hirst, E; Goodacre, S; Nicholl, J	BMJ QUALITY & SAFETY	2014	10.1136/bmjqs-2013-002003	WOS
A systematic review of the medical home for children without special health care needs	Hadland SE, Long WE.	Matern Child Health J	2014	10.1007/s10995-013-1315-9	PubMed
A systematic review of the medical home for children without special health care needs	Hadland, S.E., Long, W.E.	Maternal and Child Health Journal	2014	10.1007/s10995-013-1315-9	Scopus
A Systematic Review of the Medical Home for Children Without Special Health Care Needs	Hadland, SE; Long, WE	MATERNAL AND CHILD HEALTH JOURNAL	2014	10.1007/s10995-013-1315-9	WOS
A systematic review showing the lack of diagnostic criteria and tools developed for lower-limb cellulitis	Patel M, Lee SI, Akyea RK, Grindlay D, Francis N, Levell NJ, Smart P, Kai J, Thomas KS.	Br J Dermatol	2019	10.1111/bjd.17857	PubMed
A systematic review showing the lack of diagnostic criteria and tools developed for lower-limb cellulitis	Patel, M., Lee, S.I., Akyea, R.K., Grindlay, D., Francis, N., Levell, N.J., Smart, P., Kai, J., Thomas, K.S.	British Journal of Dermatology	2019	10.1111/bjd.17857	Scopus
A systematic review showing the lack of diagnostic criteria and tools developed for lower-limb cellulitis	Patel, M; Lee, SI; Akyea, RK; Grindlay, D; Francis, N; Levell, NJ; Smart, P; Kai, J; Thomas, KS	BRITISH JOURNAL OF DERMATOLOGY	2019	10.1111/bjd.17857	WOS
A systematic review to identify and assess the effectiveness of alternatives for people over the age of 65 who are at risk of potentially avoidable hospital admission	Huntley AL, Chalder M, Shaw ARG, Hollingworth W, Metcalfe C, Benger JR, Purdy S.	BMJ Open	2017	10.1136/bmjopen-2017-016236	PubMed
A systematic review to identify and assess the effectiveness of alternatives for people over the age of 65 who are at risk of potentially avoidable hospital admission	Huntley, A.L., Chalder, M., Shaw, A.R.G., Hollingworth, W., Metcalfe, C., Benger, J.R., Purdy, S.	BMJ Open	2017	10.1136/bmjopen-2017-016236	Scopus
A systematic review to identify and assess the effectiveness of alternatives for people over the age of 65 who are at risk of potentially avoidable hospital admission	Huntley, AL; Chalder, M; Shaw, ARG; Hollingworth, W; Metcalfe, C; Benger, JR; Purdy, S	BMJ OPEN	2017	10.1136/bmjopen-2017-016236	WOS
A time-sharing exercise in international relations	Brown, S.E.	Proceedings of the 15th Annual Southeastern Regional ACM Conference, ACM-SE 1977	1977	10.1145/1795396.1795404	Scopus
A trans-disciplinary approach to the evaluation of social determinants of health in a Hispanic population	Dulin MF, Tapp H, Smith HA, de Hernandez BU, Coffman MJ, Ludden T, Sorensen J, Furuseth OJ.	BMC Public Health	2012	10.1186/1471-2458-12-769	PubMed
A trans-disciplinary approach to the evaluation of social determinants of health in a hispanic population	Dulin, M.F., Tapp, H., Smith, H.A., De Hernandez, B.U., Coffman, M.J., Ludden, T., Sorensen, J., Furuseth, O.J.	BMC Public Health	2012	10.1186/1471-2458-12-769	Scopus
A trans-disciplinary approach to the evaluation of social determinants of health in a hispanic population	Dulin, MF; Tapp, H; Smith, HA; de Hernandez, BU; Coffman, MJ; Ludden, T; Sorensen, J; Furuseth, OJ	BMC PUBLIC HEALTH	2012	10.1186/1471-2458-12-769	WOS
A Tribute to William B. Long, Jr., and William B. Long, III: A Celebration of Their Revolutionary Contributions to Trauma Care	Edlich RF.	J Long Term Eff Med Implants	2005	10.1615/jlongtermeffmedimplants.v15.i5.10	PubMed
A tribute to William B. Long, Jr., and William B. Long, III. A celebration of their revolutionary contributions to trauma care	Edlich, R.F.	Journal of Long-Term Effects of Medical Implants	2005	10.1615/JLongTermEffMedImplants.v15.i5.10	Scopus
Accessible and continuous primary care may help reduce rates of emergency department use. An international survey in 34 countries	van den Berg, MJ; van Loenen, T; Westert, GP	FAMILY PRACTICE	2016	10.1093/fampra/cmv082	WOS
Accountable Care Hospitals and Preventable Emergency Department Visits for Rural Dementia Patients	Wang N, Amaize A, Chen J.	J Am Geriatr Soc	2021	10.1111/jgs.16858	PubMed
Accountable Care Hospitals and Preventable Emergency Department Visits for Rural Dementia Patients	Wang, N., Amaize, A., Chen, J.	Journal of the American Geriatrics Society	2021	10.1111/jgs.16858	Scopus
Accountable Care Hospitals and Preventable Emergency Department Visits for Rural Dementia Patients	Wang, NY; Amaize, A; Chen, J	JOURNAL OF THE AMERICAN GERIATRICS SOCIETY	2021	10.1111/jgs.16858	WOS
ACE Model for Older Adults in ED	Sanon M, Hwang U, Abraham G, Goldhirsch S, Richardson LD; GEDI WISE Investigators.	Geriatrics (Basel)	2019	10.3390/geriatrics4010024	PubMed
ACE model for older adults in ED	Sanon, M., Hwang, U., Abraham, G., Goldhirsch, S., Richardson, L.D.	Geriatrics (Switzerland)	2019	10.3390/geriatrics4010024	Scopus
ACE Model for Older Adults in ED	Sanon, M; Hwang, U; Abraham, G; Goldhirsch, S; Richardson, LD; Amoko, C; Baumlin, K; Genes, N; Grudzen, CR; Hamilton, C; Loo, G; Morano, B; Nassisi, D; Nimo, G; Ortiz, JM; Rivera-Reyes, L; Shapiro, J; Sze, J; Vargas-Torres, C; Winkel, G	GERIATRICS	2019	10.3390/geriatrics4010024	WOS
ACOs: time for ED managers to get involved, shape how their departments will add value		ED Manag	2011		PubMed
ACOs: time for ED managers to get involved, shape how their departments will add value.	[No author name available]	ED management : the monthly update on emergency department management	2011		Scopus
Acute Care Use for Ambulatory Care-Sensitive Conditions in High-Cost Users of Medical Care with Mental Illness and Addictions	Hensel JM, Taylor VH, Fung K, Yang R, Vigod SN.	Can J Psychiatry	2018	10.1177/0706743717752880	PubMed
Acute Care Use for Ambulatory Care-Sensitive Conditions in High-Cost Users of Medical Care with Mental Illness and Addictions	Hensel, JM; Taylor, VH; Fung, K; Yang, R; Vigod, SN	CANADIAN JOURNAL OF PSYCHIATRY-REVUE CANADIENNE DE PSYCHIATRIE	2018	10.1177/0706743717752880	WOS
Acute Care Use for Ambulatory Care–Sensitive Conditions in High-Cost Users of Medical Care with Mental Illness and Addictions [Utilisation des soins actifs pour des conditions propices aux soins ambulatoires chez des utilisateurs à coût élevé de soins médicaux souffrant de maladie mentale et de dépendances]	Hensel, J.M., Taylor, V.H., Fung, K., Yang, R., Vigod, S.N.	Canadian Journal of Psychiatry	2018	10.1177/0706743717752880	Scopus
Acute care utilization risk among older adults living undiagnosed or unaware of dementia	Amjad H, Samus QM, Huang J, Gundavarpu S, Bynum JPW, Wolff JL, Roth DL.	J Am Geriatr Soc	2021	10.1111/jgs.17550	PubMed
Acute care utilization risk among older adults living undiagnosed or unaware of dementia	Amjad, H., Samus, Q.M., Huang, J., Gundavarpu, S., Bynum, J.P.W., Wolff, J.L., Roth, D.L.	Journal of the American Geriatrics Society	2021	10.1111/jgs.17550	Scopus
Acute care utilization risk among older adults living undiagnosed or unaware of dementia	Amjad, H; Samus, QM; Huang, J; Gundavarpu, S; Bynum, JPW; Wolff, JL; Roth, DL	JOURNAL OF THE AMERICAN GERIATRICS SOCIETY		10.1111/jgs.17550	WOS
Acute complicated and uncomplicated pyelonephritis in the emergency department: process-of-care indicators and outcomes	Vicente, MD; Agara, MCL; Andres, JLB; Blasco, AC	EMERGENCIAS	2017		WOS
Acute complicated and uncomplicated pyelonephritis in the emergency department: Process-of-care indicators and outcomes [Pielonefritis aguda complicada y no complicada en urgencias: Indicadores de proceso y resultado]	Vicente, M.D., Agara, M.C.L., Andrés, J.L.B., Blasco, A.C.	Emergencias	2017		Scopus
Acute frailty services aim to cut avoidable emergency admissions	Evans, N.	Nursing Older People	2019	10.7748/nop.31.2.8.s7	Scopus
Acute hospital admissions among nursing home residents - Benefits and potential harms [Wann sollen Pflegeheimbewohner hospitalisiert werden und wann nicht?]	Bally, K.W., Nickel, C.	Praxis	2013	10.1024/1661-8157/a001376	Scopus
Additional reimbursement for outpatient physicians treating nursing home residents reduces avoidable hospital admissions: Results of a reimbursement change in Germany	Kümpel C, Schneider U.	Health Policy	2020	10.1016/j.healthpol.2020.02.009	PubMed
Additional reimbursement for outpatient physicians treating nursing home residents reduces avoidable hospital admissions: Results of a reimbursement change in Germany	Kümpel, C., Schneider, U.	Health Policy	2020	10.1016/j.healthpol.2020.02.009	Scopus
Additional reimbursement for outpatient physicians treating nursing home residents reduces avoidable hospital admissions: Results of a reimbursement change in Germany	Kumpel, C; Schneider, U	HEALTH POLICY	2020	10.1016/j.healthpol.2020.02.009	WOS
Addressing Profound Disadvantages to Improve Indigenous Health and Reduce Hospitalisation: A Collaborative Community Program in Remote Northern Territory	Quilty S, Wood L, Scrimgeour S, Shannon G, Sherman E, Lake B, Budd R, Lawton P, Moloney M.	Int J Environ Res Public Health	2019	10.3390/ijerph16224306	PubMed
Addressing profound disadvantages to improve indigenous health and reduce hospitalisation: A collaborative community program in remote northern territory	Quilty, S., Wood, L., Scrimgeour, S., Shannon, G., Sherman, E., Lake, B., Budd, R., Lawton, P., Moloney, M.	International Journal of Environmental Research and Public Health	2019	10.3390/ijerph16224306	Scopus
Addressing Profound Disadvantages to Improve Indigenous Health and Reduce Hospitalisation: A Collaborative Community Program in Remote Northern Territory	Quilty, S; Wood, L; Scrimgeour, S; Shannon, G; Sherman, E; Lake, B; Budd, R; Lawton, P; Moloney, M	INTERNATIONAL JOURNAL OF ENVIRONMENTAL RESEARCH AND PUBLIC HEALTH	2019	10.3390/ijerph16224306	WOS
Age and sex differences in hospitalisation of nursing home residents: a systematic review	Hoffmann, F; Allers, K	BMJ OPEN	2016	10.1136/bmjopen-2016-011912	WOS
Age modification of diabetes-related hospitalization among First Nations adults in Alberta, Canada	Campbell DJ, Lacny SL, Weaver RG, Manns BJ, Tonelli M, Barnabe C, Hemmelgarn BR.	Diabetol Metab Syndr	2014	10.1186/1758-5996-6-108	PubMed
Age modification of diabetes-related hospitalization among First Nations adults in Alberta, Canada	Campbell, D.J.T., Lacny, S.L., Weaver, R.G., Manns, B.J., Tonelli, M., Barnabe, C., Hemmelgarn, B.R.	Diabetology and Metabolic Syndrome	2014	10.1186/1758-5996-6-108	Scopus
Age modification of diabetes-related hospitalization among First Nations adults in Alberta, Canada	Campbell, DJT; Lacny, SL; Weaver, RG; Manns, BJ; Tonelli, M; Barnabe, C; Hemmelgarn, BR	DIABETOLOGY & METABOLIC SYNDROME	2014	10.1186/1758-5996-6-108	WOS
Ambulatory Care Sensitive Admissions in Individuals With Autism Spectrum Disorder, Intellectual Disability, and Population Controls	Hand BN, Boan AD, Bradley CC, Charles JM, Carpenter LA.	Autism Res	2019	10.1002/aur.2050	PubMed
Ambulatory Care Sensitive Admissions in Individuals With Autism Spectrum Disorder, Intellectual Disability, and Population Controls	Hand, B.N., Boan, A.D., Bradley, C.C., Charles, J.M., Carpenter, L.A.	Autism Research	2019	10.1002/aur.2050	Scopus
Ambulatory Care Sensitive Admissions in Individuals With Autism Spectrum Disorder, Intellectual Disability, and Population Controls	Hand, BN; Boan, AD; Bradley, CC; Charles, JM; Carpenter, LA	AUTISM RESEARCH	2019	10.1002/aur.2050	WOS
Ambulatory Care Sensitive Conditions Among All-Payer Claimants With Intellectual and Developmental Disabilities	Phillips, KG; Wishengrad, JS; Houtenville, AJ	AJIDD-AMERICAN JOURNAL ON INTELLECTUAL AND DEVELOPMENTAL DISABILITIES	2021	10.1352/1944-7558-126.3.203	WOS
Ambulatory care sensitive conditions at out-of-hospital emergence services in Croatia: a longitudinal study based on routinely collected data	Kostanjšek D, Benčić M, Keglević MV.	Coll Antropol	2014		PubMed
Ambulatory care sensitive conditions at out-of-hospital emergence services in Croatia: a longitudinal study based on routinely collected data	Kostanjšek, D., Benčić, M., Keglević, M.V.	Collegium antropologicum	2014		Scopus
Ambulatory care sensitive conditions hospitalization for emergencies rates in Colombia	González-Vélez AE, Mejía CCC, Padilla EL, Marín SYM, Bobadilla PAR, Sánchez JPR, Ruget MAI.	Rev Saude Publica	2019	10.11606/S1518-8787.2019053000563	PubMed
Ambulatory care sensitive conditions hospitalization for emergencies rates in Colombia	González-Vélez, A.E., Mejía, C.C.C., Padilla, E.L., Marín, S.Y.M., Bobadilla, P.A.R., Sánchez, J.P.R., Ruget, M.A.I.	Revista de Saude Publica	2019	10.11606/S1518-8787.2019053000563	Scopus
Ambulatory care sensitive conditions hospitalization for emergencies rates in Colombia	Gonzalez-Velez, AE; Mejia, CCC; Padilla, EL; Marin, SYM; Bobadilla, PAR; Sanchez, JPR; Ruget, MAI	REVISTA DE SAUDE PUBLICA	2019	10.11606/S1518-8787.2019053000563	WOS
Ambulatory care sensitive conditions: terminology and disease coding need to be more specific to aid policy makers and clinicians	Purdy S, Griffin T, Salisbury C, Sharp D.	Public Health	2009	10.1016/j.puhe.2008.11.001	PubMed
Ambulatory care sensitive conditions: terminology and disease coding need to be more specific to aid policy makers and clinicians	Purdy, S., Griffin, T., Salisbury, C., Sharp, D.	Public Health	2009	10.1016/j.puhe.2008.11.001	Scopus
Ambulatory care sensitive conditions: terminology and disease coding need to be more specific to aid policy makers and clinicians	Purdy, S; Griffin, T; Salisbury, C; Sharp, D	PUBLIC HEALTH	2009	10.1016/j.puhe.2008.11.001	WOS
Ambulatory care sensitive emergency department use among low-cost medical home patients	Carlo ME, Powers JS.	Tenn Med	2010		PubMed
Ambulatory care sensitive emergency department use among low-cost medical home patients.	Carlo, M.E., Powers, J.S.	Tennessee medicine : journal of the Tennessee Medical Association	2010		Scopus
Ambulatory care sensitive hospitalizations and emergency visits: experiences of Medicaid patients using federally qualified health centers	Falik M, Needleman J, Wells BL, Korb J.	Med Care	2001	10.1097/00005650-200106000-00004	PubMed
Ambulatory care sensitive hospitalizations and emergency visits: Experiences of medicaid patients using federally qualified health centers	Falik, M., Needleman, J., Wells, B.L., Korb, J.	Medical Care	2001	10.1097/00005650-200106000-00004	Scopus
Ambulatory care sensitive hospitalizations and emergency visits: Experiences of Medicaid patients using federally qualified health centers	Falik, M; Needleman, J; Wells, BL; Korb, J	MEDICAL CARE	2001	10.1097/00005650-200106000-00004	WOS
Ambulatory Care Sensitive Hospitalizations Through the Emergency Department by Payer: Comparing 2003 and 2009	Dresden SM, Feinglass JM, Kang R, Adams JG.	J Emerg Med	2016	10.1016/j.jemermed.2015.02.047	PubMed
Ambulatory Care Sensitive Hospitalizations Through the Emergency Department by Payer: Comparing 2003 and 2009	Dresden, S.M., Feinglass, J.M., Kang, R., Adams, J.G.	Journal of Emergency Medicine	2016	10.1016/j.jemermed.2015.02.047	Scopus
AMBULATORY CARE SENSITIVE HOSPITALIZATIONS THROUGH THE EMERGENCY DEPARTMENT BY PAYER: COMPARING 2003 AND 2009	Dresden, SM; Feinglass, JM; Kang, R; Adams, JG	JOURNAL OF EMERGENCY MEDICINE	2016	10.1016/j.jemermed.2015.02.047	WOS
Ambulatory Care-Sensitive Conditions Associated With Potentially Avoidable Hospital Admissions	Berger, S; Szecsenyi, J; Laux, G; Leutgeb, R	JOURNAL OF THE AMERICAN MEDICAL DIRECTORS ASSOCIATION	2020	10.1016/j.jamda.2019.09.016	WOS
Ambulatory care-sensitive conditions: their potential uses and limitations	Hodgson K, Deeny SR, Steventon A.	BMJ Qual Saf	2019	10.1136/bmjqs-2018-008820	PubMed
Ambulatory care-sensitive conditions: Their potential uses and limitations	Hodgson, K., Deeny, S.R., Steventon, A.	BMJ Quality and Safety	2019	10.1136/bmjqs-2018-008820	Scopus
Ambulatory care-sensitive emergency visits among patients with medical home access	Hafez D, McMahon LF Jr, Balogh L, Brinley FJ 3rd, Crump J, Ealovega M, Fan A, Kwok Y, Krieger K, O'Connor T, Ostafin E, Reichert H, Meddings J.	Am J Manag Care	2018		PubMed
Ambulatory care-sensitive emergency visits among patients with medical home access	Hafez, D., McMahon, L.F., Balogh, L., Brinley, F.J., Crump, J., Ealovega, M., Fan, A., Kwok, Y., Krieger, K., O'Connor, T., Ostafin, E., Reichert, H., Meddings, J.	American Journal of Managed Care	2018		Scopus
Ambulatory Care-Sensitive Emergency Visits Among Patients With Medical Home Access	Hafez, D; McMahon, LF; Balogh, L; Brinley, FJ; Crump, J; Ealovega, M; Fan, A; Kwok, Y; Krieger, K; O'Connor, T; Ostafin, E; Reichert, H; Meddings, J	AMERICAN JOURNAL OF MANAGED CARE	2018		WOS
An 8-year Retrospective Review of Gastrointestinal Medical Emergency Conditions at a Tertiary Health Facility in Nigeria	Oluwagbenga, OO; Musah, Y	SUDAN JOURNAL OF MEDICAL SCIENCES	2018	10.18502/sjms.v13i1.1684	WOS
An analysis of the New York university emergency department algorithm's suitability for use in gauging changes in ED usage patterns	Jones, K., Paxton, H., Hagtvedt, R., Etchason, J.	Medical Care	2013	10.1097/MLR.0b013e318242315b	Scopus
An Analysis of the New York University Emergency Department Algorithm's Suitability for Use in Gauging Changes in ED Usage Patterns	Jones, K; Paxton, H; Hagtvedt, R; Etchason, J	MEDICAL CARE	2013	10.1097/MLR.0b013e318242315b	WOS
An ED pilot intervention to facilitate outpatient acute care for cancer patients	Brooks, GA; Chen, EJ; Murakami, MA; Giannakis, M; Baugh, CW; Schrag, D	AMERICAN JOURNAL OF EMERGENCY MEDICINE	2016	10.1016/j.ajem.2016.06.076	WOS
An evaluation of the effectiveness of annual health checks and quality of health care for adults with intellectual disability: an observational study using a primary care database	Carey IM, Hosking FJ, Harris T, DeWilde S, Beighton C, Cook DG.	An evaluation of the effectiveness of annual health checks and quality of health care for adults with intellectual disability: an observational study using a primary care database	2017	10.3310/hsdr05250	PubMed
An Innovative Day Hospital Dedicated to Nursing Home Resident: A Descriptive Study of 1306 Residents Referred by their Physicians	Laffon de Mazières C, Romain M, Hermabessière S, Abellan G, Gerard S, Castex A, Krams T, Vellas B, Rolland Y.	J Nutr Health Aging	2018	10.1007/s12603-018-1106-5	PubMed
An Innovative Day Hospital Dedicated to Nursing Home Resident: A Descriptive Study of 1306 Residents Referred by Their Physicians	Laffon de Mazières, C., Romain, M., Hermabessière, S., Abellan, G., Gerard, S., Castex, A., Krams, T., Vellas, B., Rolland, Y.	Journal of Nutrition, Health and Aging	2018	10.1007/s12603-018-1106-5	Scopus
AN INNOVATIVE DAY HOSPITAL DEDICATED TO NURSING HOME RESIDENT: A DESCRIPTIVE STUDY OF 1306 RESIDENTS REFERRED BY THEIR PHYSICIANS	De Mazieres, CL; Romain, M; Hermabessiere, S; Abellan, G; Gerard, S; Castex, A; Krams, T; Vellas, B; Rolland, Y	JOURNAL OF NUTRITION HEALTH & AGING	2018	10.1007/s12603-018-1106-5	WOS
An integrated understanding of the complex drivers of emergency presentations and admissions in cancer patients: Qualitative modelling of secondary-care health professionals' experiences and views	Chen H, Walabyeki J, Johnson M, Boland E, Seymour J, Macleod U.	PLoS One	2019	10.1371/journal.pone.0216430	PubMed
An integrated understanding of the complex drivers of emergency presentations and admissions in cancer patients: Qualitative modelling of secondary-care health professionals' experiences and views	Chen, H; Walabyeki, J; Johnson, M; Boland, E; Seymour, J; Macleod, U	PLOS ONE	2019	10.1371/journal.pone.0216430	WOS
An integrated understanding of the complex drivers of emergency presentations and admissions in cancer patients: Qualitative modelling of secondary-care health professionals’ experiences and views	Chen, H., Walabyeki, J., Johnson, M., Boland, E., Seymour, J., Macleod, U.	PLoS ONE	2019	10.1371/journal.pone.0216430	Scopus
An observational cohort study of numbers and causes of preventable general hospital admissions in people with and without intellectual disabilities in England	Glover G, Williams R, Oyinlola J.	J Intellect Disabil Res	2020	10.1111/jir.12722	PubMed
An observational cohort study of numbers and causes of preventable general hospital admissions in people with and without intellectual disabilities in England	Glover, G., Williams, R., Oyinlola, J.	Journal of Intellectual Disability Research	2020	10.1111/jir.12722	Scopus
An observational cohort study of numbers and causes of preventable general hospital admissions in people with and without intellectual disabilities in England	Glover, G; Williams, R; Oyinlola, J	JOURNAL OF INTELLECTUAL DISABILITY RESEARCH	2020	10.1111/jir.12722	WOS
An overview on the cause and management of postpartum hemorrhage	Khan, J.A., Zhu, S., Wang, X.	International Journal of Current Research and Review	2019	10.31782/IJCRR.2019.0106	Scopus
Analysis of Emergency Department Utilization in Medicaid Expansion and Non-expansion States	Lall A, Devereaux R, Flynn M, Vandever C, Tomsky-Jackson K.	Cureus	2021	10.7759/cureus.18561	PubMed
Analysis of Emergency Department Utilization in Medicaid Expansion and Non-expansion States	Lall, A; Devereaux, R; Flynn, M; Vandever, C; Tomsky-Jackson, K	CUREUS	2021	10.7759/cureus.18561	WOS
Analysis of hospital ability to provide trauma services: a comparison between teaching and community hospitals	Neely KW, Norton RL, Bartkus E, Schiver JA.	Prehosp Disaster Med	1991	10.1017/s1049023x00038954	PubMed
Analysis of Hospital Ability to Provide Trauma Services: A Comparison between Teaching and Community Hospitals	Neely, K.W., Norton, R.L., Bartkus, E., Schiver, J.A.	Prehospital and Disaster Medicine	1991	10.1017/S1049023X00038954	Scopus
Antibiotic prescription for acute rhinosinusitis: Emergency departments versus primary care providers	Bergmark RW, Sedaghat AR.	Laryngoscope	2016	10.1002/lary.26001	PubMed
Antibiotic prescription for acute rhinosinusitis: Emergency departments versus primary care providers	Bergmark, R.W., Sedaghat, A.R.	Laryngoscope	2016	10.1002/lary.26001	Scopus
Antibiotic prescription for acute rhinosinusitis: Emergency departments versus primary care providers	Bergmark, RW; Sedaghat, AR	LARYNGOSCOPE	2016	10.1002/lary.26001	WOS
Anticipatory Care in Potentially Preventable Hospitalizations: Making Data Sense of Complex Health Journeys	Martin CM, Sturmberg JP, Stockman K, Hinkley N, Campbell D.	Front Public Health	2019	10.3389/fpubh.2018.00376	PubMed
Anticipatory care in potentially preventable hospitalizations: Making data sense of complex health journeys	Martin, C.M., Sturmberg, J.P., Stockman, K., Hinkley, N., Campbell, D.	Frontiers in Public Health	2019	10.3389/fpubh.2018.00376	Scopus
Anticipatory Care in Potentially Preventable Hospitalizations: Making Data Sense of Complex Health Journeys	Martin, CM; Sturmberg, JP; Stockman, K; Hinkley, N; Campbell, D	FRONTIERS IN PUBLIC HEALTH	2019	10.3389/fpubh.2018.00376	WOS
Application of American College of Surgeons' field triage guidelines by pre-hospital personnel	Norcross ED, Ford DW, Cooper ME, Zone-Smith L, Byrne TK, Yarbrough DR 3rd.	J Am Coll Surg	1995		PubMed
Application of American College of Surgeons' field triage guidelines by pre-hospital personnel	Norcross, E.D., Ford, D.W., Cooper, M.E., Zone-Smith, L., Byrne, T.K., Yarbrough III, D.R.	Journal of the American College of Surgeons	1995		Scopus
APPLICATION OF AMERICAN-COLLEGE OF SURGEONS FIELD TRIAGE GUIDELINES BY PREHOSPITAL PERSONNEL	NORCROSS, ED; FORD, DW; COOPER, ME; ZONESMITH, L; BYRNE, TK; YARBROUGH, DR	JOURNAL OF THE AMERICAN COLLEGE OF SURGEONS	1995		WOS
Appropriate use of emergency department thoracotomy: implications for the thoracic surgeon	Mollberg NM, Glenn C, John J, Wise SR, Sullivan R, Vafa A, Snow NJ, Massad MG.	Ann Thorac Surg	2011	10.1016/j.athoracsur.2011.04.042	PubMed
Are ambulatory care–sensitive conditions the fulcrum of hospitalizations for CKD patients?	Fink, J.C.	Clinical Journal of the American Society of Nephrology	2016	10.2215/CJN.09160816	Scopus
Are rural and urban emergency departments equal prepared to reduce avoidable hospitalizations?	Greenwood-Ericksen, M.B., MacY, M.L., Ham, J., Nypaver, M.M., Zochowski, M., Kocher, K.E.	Western Journal of Emergency Medicine	2019	10.5811/westjem.2019.2.42057	Scopus
Are Rural and Urban Emergency Departments Equally Prepared to Reduce Avoidable Hospitalizations?	Greenwood-Ericksen MB, Macy ML, Ham J, Nypaver MM, Zochowski M, Kocher KE.	West J Emerg Med	2019	10.5811/westjem.2019.2.42057	PubMed
Are Rural and Urban Emergency Departments Equally Prepared to Reduce Avoidable Hospitalizations?	Greenwood-Ericksen, MB; Macy, ML; Ham, J; Nypaver, MM; Zochowski, M; Kocher, KE	WESTERN JOURNAL OF EMERGENCY MEDICINE	2019	10.5811/westjem.2019.2.42057	WOS
Assessing Preventable Hospitalisation InDicators (APHID): protocol for a data-linkage study using cohort study and administrative data	Jorm LR, Leyland AH, Blyth FM, Elliott RF, Douglas KM, Redman S; HID Investigators.	BMJ Open	2012	10.1136/bmjopen-2012-002344	PubMed
Assessing Preventable Hospitalisation InDicators (APHID): Protocol for a data-linkage study using cohort study and administrative data	Jorm, L.R., Leyland, A.H., Blyth, F.M., Elliott, R.F., Douglas, K.M.A., Redman, S.	BMJ Open	2012	10.1136/bmjopen-2012-002344	Scopus
Assessing Preventable Hospitalisation InDicators (APHID): protocol for a data-linkage study using cohort study and administrative data	Jorm, LR; Leyland, AH; Blyth, FM; Elliott, RF; Douglas, KMA; Redman, S	BMJ OPEN	2012	10.1136/bmjopen-2012-002344	WOS
Assessing the Associations of Patient-Reported Perceptions of Patient-Centered Care as Supplemental Measures of Health Care Quality in VA	Etingen B, Miskevics S, LaVela SL.	J Gen Intern Med	2016	10.1007/s11606-015-3557-2	PubMed
Assessing the Associations of Patient-Reported Perceptions of Patient-Centered Care as Supplemental Measures of Health Care Quality in VA	Etingen, B., Miskevics, S., LaVela, S.L.	Journal of General Internal Medicine	2016	10.1007/s11606-015-3557-2	Scopus
Assessing the Associations of Patient-Reported Perceptions of Patient-Centered Care as Supplemental Measures of Health Care Quality in VA	Etingen, B; Miskevics, S; LaVela, SL	JOURNAL OF GENERAL INTERNAL MEDICINE	2016	10.1007/s11606-015-3557-2	WOS
Assessing the Causal Impact of Delayed Oral Health Care on Emergency Department Utilization	Gao, L., Rosenberg, M.A.	North American Actuarial Journal	2021	10.1080/10920277.2020.1735448	Scopus
Assessing the Causal Impact of Delayed Oral Health Care on Emergency Department Utilization	Gao, LS; Rosenberg, MA	NORTH AMERICAN ACTUARIAL JOURNAL	2021	10.1080/10920277.2020.1735448	WOS
Assessment of a chronic care program in Gerona (CRONIGICAT) [Evaluación de un programa de atención a la cronicidad en Girona (CRONIGICAT)]	Sabaté, M.Q., Ponsa, M.C., Revuelta, E.A., Requejo, S.R., Rebull, F.G., Peña, E.B.	Atencion Primaria	2014	10.1016/S0212-6567(14)70062-9	Scopus
Assessment of access to primary health care among children and adolescents hospitalized due to avoidable conditions	Ferrer AP, Grisi SJ.	Rev Assoc Med Bras (1992)	2016	10.1590/1806-9282.62.06.513	PubMed
Assessment of access to primary health care among children and adolescents hospitalized due to avoidable conditions	Ferrer, A.P.S., Grisi, S.J.F.E.	Revista da Associacao Medica Brasileira	2016	10.1590/1806-9282.62.06.513	Scopus
Assessment of access to primary health care among children and adolescents hospitalized due to avoidable conditions	Ferrer, APS; Grisi, SJFE	REVISTA DA ASSOCIACAO MEDICA BRASILEIRA	2016	10.1590/1806-9282.62.06.513	WOS
Assessment tools for determining appropriateness of admission to acute care of persons transferred from long-term care facilities: a systematic review	Renom-Guiteras, A; Uhrenfeldt, L; Meyer, G; Mann, E	BMC GERIATRICS	2014	10.1186/1471-2318-14-80	WOS
Association between availability of care providers and healthcare utilizations among adults with asthma	Kim, M; Asche, CV; Tillis, W; Ren, J	CURRENT MEDICAL RESEARCH AND OPINION	2017	10.1080/03007995.2016.1264930	WOS
Association between clinic physician workforce and avoidable readmission: A retrospective database research	Hirota, Y., Kunisawa, S., Fushimi, K., Imanaka, Y.	BMC Health Services Research	2020	10.1186/s12913-020-4966-4	Scopus
Association between Continuity and Team-Based Care and Health Care Utilization: An Observational Study of Medicare-Eligible Veterans in VA Patient Aligned Care Team	Reddy A, Wong E, Canamucio A, Nelson K, Fihn SD, Yoon J, Werner RM.	Health Serv Res	2018	10.1111/1475-6773.13042	PubMed
Association between Continuity and Team-Based Care and Health Care Utilization: An Observational Study of Medicare-Eligible Veterans in VA Patient Aligned Care Team	Reddy, A., Wong, E., Canamucio, A., Nelson, K., Fihn, S.D., Yoon, J., Werner, R.M.	Health Services Research	2018	10.1111/1475-6773.13042	Scopus
Association between Continuity and Team-Based Care and Health Care Utilization: An Observational Study of Medicare-Eligible Veterans in VA Patient Aligned Care Team	Reddy, A; Wong, E; Canamucio, A; Nelson, K; Fihn, SD; Yoon, J; Werner, RM	HEALTH SERVICES RESEARCH	2018	10.1111/1475-6773.13042	WOS
Association between continuity of care and emergency department visits and hospitalization in senior adults with asthma-COPD overlap	Kao, YH; Tseng, TS; Ng, YY; Wu, SC	HEALTH POLICY	2019	10.1016/j.healthpol.2018.11.005	WOS
Association between quality domains and health care spending across physician networks	Rahman F, Guan J, Glazier RH, Brown A, Bierman AS, Croxford R, Stukel TA.	PLoS One	2018	10.1371/journal.pone.0195222	PubMed
Association between quality domains and health care spending across physician networks	Rahman, F., Guan, J., Glazier, R.H., Brown, A., Bierman, A.S., Croxford, R., Stukel, T.A.	PLoS ONE	2018	10.1371/journal.pone.0195222	Scopus
Association between quality domains and health care spending across physician networks	Rahman, F; Guanl, J; Glazier, RH; Brown, A; Bierman, AS; Croxford, R; Stukel, TA	PLOS ONE	2018	10.1371/journal.pone.0195222	WOS
Association between Temporal Changes in Primary Care Workforce and Patient Outcomes	Chang CH, O'Malley AJ, Goodman DC.	Health Serv Res	2017	10.1111/1475-6773.12513	PubMed
Association between Temporal Changes in Primary CareWorkforce and Patient Outcomes	Chang, C.-H., O'Malley, A.J., Goodman, D.C.	Health Services Research	2017	10.1111/1475-6773.12513	Scopus
Association between Temporal Changes in Primary CareWorkforce and Patient Outcomes	Chang, CH; O'Malley, AJ; Goodman, DC	HEALTH SERVICES RESEARCH	2017	10.1111/1475-6773.12513	WOS
Association between trauma quality indicators and outcomes for injured patients	Glance, L.G., Dick, A.W., Mukamel, D.B., Osler, T.M.	Archives of Surgery	2012	10.1001/archsurg.2011.1327	Scopus
Association of a Care Coordination Model With Health Care Costs and Utilization The Johns Hopkins Community Health Partnership (J-CHiP)	Berkowitz, SA; Parashuram, S; Rowan, K; Andon, L; Bass, EB; Bellantoni, M; Brotman, DJ; Deutschendorf, A; Dunbar, L; Durso, SC; Everett, A; Giuriceo, KD; Hebert, L; Hickman, D; Hough, DE; Howell, EE; Huang, X; Lepley, D; Leung, C; Lu, YY; Lyketsos, CG; Murphy, SME; Novak, T; Purnell, L; Sylvester, C; Wu, AW; Zollinger, R; Koenig, K; Ahn, R; Rothman, PB; Brown, PMC	JAMA NETWORK OPEN	2018	10.1001/jamanetworkopen.2018.4273	WOS
Association of a Care Coordination Model With Health Care Costs and Utilization: The Johns Hopkins Community Health Partnership (J-CHiP)	Berkowitz SA, Parashuram S, Rowan K, Andon L, Bass EB, Bellantoni M, Brotman DJ, Deutschendorf A, Dunbar L, Durso SC, Everett A, Giuriceo KD, Hebert L, Hickman D, Hough DE, Howell EE, Huang X, Lepley D, Leung C, Lu Y, Lyketsos CG, Murphy SME, Novak T, Purnell L, Sylvester C, Wu AW, Zollinger R, Koenig K, Ahn R, Rothman PB, Brown PMC; Johns Hopkins Community Health Partnership (J-CHiP) Team.	JAMA Netw Open	2018	10.1001/jamanetworkopen.2018.4273	PubMed
Association of a Care Coordination Model with Health Care Costs and Utilization: The Johns Hopkins Community Health Partnership (J-CHiP)	Berkowitz, S.A., Parashuram, S., Rowan, K., Andon, L., Bass, E.B., Bellantoni, M., Brotman, D.J., Deutschendorf, A., Dunbar, L., Durso, S.C., Everett, A., Giuriceo, K.D., Hebert, L., Hickman, D., Hough, D.E., Howell, E.E., Huang, X., Lepley, D., Leung, C., Lu, Y., Lyketsos, C.G., Murphy, S.M.E., Novak, T., Purnell, L., Sylvester, C., Wu, A.W., Zollinger, R., Koenig, K., Ahn, R., Rothman, P.B., Br…	JAMA Network Open	2018	10.1001/jamanetworkopen.2018.4273	Scopus
Association of a Multisite Interprofessional Education Initiative With Quality of Primary Care	Edwards, ST; Hooker, ER; Brienza, R; O'Brien, B; Kim, H; Gilman, S; Harada, N; Gelberg, L; Shull, S; Niederhausen, M; King, S; Hulen, E; Singh, MK; Tuepker, A	JAMA NETWORK OPEN	2019	10.1001/jamanetworkopen.2019.15943	WOS
Association of Affordable Care Act Implementation With Ambulance Utilization for Asthma Emergencies in New York City, 2008-2018	Peters GA, Ordoobadi AJ, Cash RE, Wong ML, Avillach P, Camargo CA Jr.	JAMA Netw Open	2020	10.1001/jamanetworkopen.2020.25586	PubMed
Association of Affordable Care Act Implementation with Ambulance Utilization for Asthma Emergencies in New York City, 2008-2018	Peters, G.A., Ordoobadi, A.J., Cash, R.E., Wong, M.L., Avillach, P., Camargo, C.A.	JAMA Network Open	2020	10.1001/jamanetworkopen.2020.25586	Scopus
Association of Affordable Care Act Implementation With Ambulance Utilization for Asthma Emergencies in New York City, 2008-2018	Peters, GA; Ordoobadi, AJ; Cash, RE; Wong, ML; Avillach, P; Camargo, CA	JAMA NETWORK OPEN	2020	10.1001/jamanetworkopen.2020.25586	WOS
Association of enrolment in primary care networks with diabetes care and outcomes among First Nations and low-income Albertans	Campbell DJ, Ronksley PE, Hemmelgarn BR, Zhang J, Barnabe C, Tonelli M, Manns B.	Open Med	2012		PubMed
Association of enrolment in primary care networks with diabetes care and outcomes among First Nations and low-income Albertans.	Campbell, D.J., Ronksley, P.E., Hemmelgarn, B.R., Zhang, J., Barnabe, C., Tonelli, M., Manns, B.	Open medicine : a peer-reviewed, independent, open-access journal	2012		Scopus
Association of High-Cost Health Care Utilization With Longitudinal Changes in Patient-Centered Medical Home Implementation	Reddy A, Gunnink E, Taylor L, Wong E, Batten AJ, Fihn SD, Nelson KM.	JAMA Netw Open	2020	10.1001/jamanetworkopen.2019.20500	PubMed
Association of High-Cost Health Care Utilization with Longitudinal Changes in Patient-Centered Medical Home Implementation	Reddy, A., Gunnink, E., Taylor, L., Wong, E., Batten, A.J., Fihn, S.D., Nelson, K.M.	JAMA Network Open	2020	10.1001/jamanetworkopen.2019.20500	Scopus
Association of High-Cost Health Care Utilization With Longitudinal Changes in Patient-Centered Medical Home Implementation	Reddy, A; Gunnink, E; Taylor, L; Wong, E; Batten, AJ; Fihn, SD; Nelson, KM	JAMA NETWORK OPEN	2020	10.1001/jamanetworkopen.2019.20500	WOS
Association of mental health disorders and Medicaid with ED admissions for ambulatory care-sensitive condition conditions	Bergamo C, Juarez-Colunga E, Capp R.	Am J Emerg Med	2016	10.1016/j.ajem.2016.01.023	PubMed
Association of mental health disorders and Medicaid with ED admissions for ambulatory care-sensitive condition conditions	Bergamo, C., Juarez-Colunga, E., Capp, R.	American Journal of Emergency Medicine	2016	10.1016/j.ajem.2016.01.023	Scopus
Association of mental health disorders and Medicaid with ED admissions for ambulatory care-sensitive condition conditions	Bergamo, C; Juarez-Colunga, E; Capp, R	AMERICAN JOURNAL OF EMERGENCY MEDICINE	2016	10.1016/j.ajem.2016.01.023	WOS
Association of Mental Health Disorders With Health Care Utilization and Costs Among Adults With Chronic Disease	Sporinova B, Manns B, Tonelli M, Hemmelgarn B, MacMaster F, Mitchell N, Au F, Ma Z, Weaver R, Quinn A.	JAMA Netw Open	2019	10.1001/jamanetworkopen.2019.9910	PubMed
Association of Mental Health Disorders with Health Care Utilization and Costs among Adults with Chronic Disease	Sporinova, B., Manns, B., Tonelli, M., Hemmelgarn, B., Macmaster, F., Mitchell, N., Au, F., Ma, Z., Weaver, R., Quinn, A.	JAMA Network Open	2019	10.1001/jamanetworkopen.2019.9910	Scopus
Association of Mental Health Disorders With Health Care Utilization and Costs Among Adults With Chronic Disease	Sporinova, B; Manns, B; Tonelli, M; Hemmelgarn, B; MacMaster, F; Mitchell, N; Au, F; Ma, ZH; Weaver, R; Quinn, A	JAMA NETWORK OPEN	2019	10.1001/jamanetworkopen.2019.9910	WOS
Association of Primary Language and Hospitalization for Ambulatory Care Sensitive Conditions	Anderson TS, Karliner LS, Lin GA.	Med Care	2020	10.1097/MLR.0000000000001245	PubMed
Association of Primary Language and Hospitalization for Ambulatory Care Sensitive Conditions	Anderson, T.S., Karliner, L.S., Lin, G.A.	Medical Care	2020	10.1097/MLR.0000000000001245	Scopus
Association of Primary Language and Hospitalization for Ambulatory Care Sensitive Conditions	Anderson, TS; Karliner, LS; Lin, GA	MEDICAL CARE	2020	10.1097/MLR.0000000000001245	WOS
Association of Specialist Physician Payment Model With Visit Frequency, Quality, and Costs of Care for People With Chronic Disease	Quinn AE, Hemmelgarn BR, Tonelli M, McBrien KA, Edwards A, Senior P, Faris P, Au F, Ma Z, Weaver RG, Manns BJ.	JAMA Netw Open	2019	10.1001/jamanetworkopen.2019.14861	PubMed
Association of Specialist Physician Payment Model with Visit Frequency, Quality, and Costs of Care for People with Chronic Disease	Quinn, A.E., Hemmelgarn, B.R., Tonelli, M., McBrien, K.A., Edwards, A., Senior, P., Faris, P., Au, F., Ma, Z., Weaver, R.G., Manns, B.J.	JAMA Network Open	2019	10.1001/jamanetworkopen.2019.14861	Scopus
Association of Specialist Physician Payment Model With Visit Frequency, Quality, and Costs of Care for People With Chronic Disease	Quinn, AE; Hemmelgarn, BR; Tonelli, M; McBrien, KA; Edwards, A; Senior, P; Faris, P; Au, F; Ma, ZH; Weaver, RG; Manns, BJ	JAMA NETWORK OPEN	2019	10.1001/jamanetworkopen.2019.14861	WOS
Associations between maternal age and infant health outcomes among Medicaid-insured infants in South Carolina: mediating effects of socioeconomic factors	Pittard WB 3rd, Laditka JN, Laditka SB.	Pediatrics	2008	10.1542/peds.2007-1314	PubMed
Associations between maternal age and infant health outcomes among medicaid-insured infants in South Carolina: Mediating effects of socioeconomic factors	Pittard III, W.B., Laditka, J.N., Laditka, S.B.	Pediatrics	2008	10.1542/peds.2007-1314	Scopus
Associations between maternal age and infant health outcomes among medicaid-insured infants in South Carolina: Mediating effects of socioeconomic factors	Pittard, WB; Laditka, JN; Laditka, SB	PEDIATRICS	2008	10.1542/peds.2007-1314	WOS
Associations of GP practice characteristics with the rate of ambulatory care sensitive conditions in people living with dementia in England: an ecological analysis of routine data	Eyles E, Redaniel MT, Purdy S, Tilling K, Ben-Shlomo Y.	BMC Health Serv Res	2021	10.1186/s12913-021-06634-7	PubMed
Associations of GP practice characteristics with the rate of ambulatory care sensitive conditions in people living with dementia in England: an ecological analysis of routine data	Eyles, E., Redaniel, M.T., Purdy, S., Tilling, K., Ben-Shlomo, Y.	BMC Health Services Research	2021	10.1186/s12913-021-06634-7	Scopus
Associations of GP practice characteristics with the rate of ambulatory care sensitive conditions in people living with dementia in England: an ecological analysis of routine data	Eyles, E; Redaniel, MT; Purdy, S; Tilling, K; Ben-Shlomo, Y	BMC HEALTH SERVICES RESEARCH	2021	10.1186/s12913-021-06634-7	WOS
Asthma-like symptoms prevalence in five Turkish urban centers	Emri S, Turnagöl H, Başoglu S, Bacanli S, Guven GS, Aslan D.	Allergol Immunopathol (Madr)	2005	10.1157/13080930	PubMed
Asthma-like symptoms prevalence in five Turkish urban centers	Emri, S., Turnagöl, H., Başoǧlu, S., Bacanli, S., Guven, G.S., Aslan, D.	Allergologia et Immunopathologia	2005	10.1157/13080930	Scopus
At-risk characteristics for hospital admissions and ED visits	Hudson SM, Mueller M, Hester WH, Magwood GS, Newman SD, Laken MA.	J Spec Pediatr Nurs	2014	10.1111/jspn.12068	PubMed
At-risk characteristics for hospital admissions and ED visits	Hudson, S.M., Mueller, M., Hester, W.H., Magwood, G.S., Newman, S.D., Laken, M.A.	Journal for specialists in pediatric nursing : JSPN	2014	10.1111/jspn.12068	Scopus
At-risk characteristics for hospital admissions and ED visits	Hudson, SM; Mueller, M; Hester, WH; Magwood, GS; Newman, SD; Laken, MA	JOURNAL FOR SPECIALISTS IN PEDIATRIC NURSING	2014	10.1111/jspn.12068	WOS
Avoidable emergency admissions for ambulatory care sensitive conditions in the Republic of Ireland: analysis of regional determinants	Lynch, BM; Fitzgerald, T; Corcoran, P; Buckley, C; Healy, O; Browne, J	INTERNATIONAL JOURNAL OF INTEGRATED CARE	2018	10.5334/ijic.s2352	WOS
AVOIDABLE EMERGENCY ADMISSIONS IN THE REPUBLIC OF IRELAND: ANALYSIS OF REGIONAL DETERMINANTS	Lynch, B; Fitzgerald, AP; Browne, JP	JOURNAL OF EPIDEMIOLOGY AND COMMUNITY HEALTH	2017	10.1136/jech-2017-SSMAbstracts.174	WOS
Avoidable emergency admissions?	Lillebo B, Dyrstad B, Grimsmo A.	Emerg Med J	2013	10.1136/emermed-2012-201630	PubMed
Avoidable emergency admissions?	Lillebo, B., Dyrstad, B., Grimsmo, A.	Emergency Medicine Journal	2013	10.1136/emermed-2012-201630	Scopus
Avoidable emergency admissions?	Lillebo, B; Dyrstad, B; Grimsmo, A	EMERGENCY MEDICINE JOURNAL	2013	10.1136/emermed-2012-201630	WOS
Avoidable hospitalisation for diabetes mellitus among immigrants and natives: Results from the Italian Network for Longitudinal Metropolitan Studies	Dalla Zuanna, T., Cacciani, L., Barbieri, G., Ferracin, E., Zengarini, N., Di Girolamo, C., Caranci, N., Petrelli, A., Marino, C., Agabiti, N., Canova, C.	Nutrition, Metabolism and Cardiovascular Diseases	2020	10.1016/j.numecd.2020.05.006	Scopus
Avoidable hospitalisation in Aboriginal and non-Aboriginal people in the Northern Territory	Li SQ, Gray NJ, Guthridge SL, Pircher SL.	Med J Aust	2009	10.5694/j.1326-5377.2009.tb02551.x	PubMed
Avoidable hospitalisation in Aboriginal and non-Aboriginal people in the Northern Territory	Li, S.Q., Gray, N.J., Guthridge, S.L., Pircher, S.L.M.	Medical Journal of Australia	2009	10.5694/j.1326-5377.2009.tb02551.x	Scopus
Avoidable hospitalisation in Aboriginal and non-Aboriginal people in the Northern Territory	Li, SQ; Gray, NJ; Guthridge, SL; Pircher, SLM	MEDICAL JOURNAL OF AUSTRALIA	2009	10.5694/j.1326-5377.2009.tb02551.x	WOS
Avoidable Hospitalizations And Observation Stays: Shifts In Racial Disparities	Figueroa JF, Burke LG, Horneffer KE, Zheng J, John Orav E, Jha AK.	Health Aff (Millwood)	2020	10.1377/hlthaff.2019.01019	PubMed
Avoidable hospitalizations due to adverse drug reactions in an acute geriatric unit. Analysis of 3,292 patients	Cabre, M; Elias, L; Garcia, M; Palomera, E; Serra-Prat, M	MEDICINA CLINICA	2018	10.1016/j.medcli.2017.06.075	WOS
Avoidable hospitalizations, substandard care associated with inadequate health insurance	[No author name available]	American Journal of Hospital Pharmacy	1993		Scopus
Avoiding hospital admissions for respiratory system diseases by complying to the final Brazilian air quality standard: an estimate for Brazilian southeast capitals	Fernandes, MAD; Andreao, WL; Maciel, FM; Albuquerque, TTD	ENVIRONMENTAL SCIENCE AND POLLUTION RESEARCH	2020	10.1007/s11356-020-07772-x	WOS
Barriers to eliminating disparities in clinical practice: Lessons from the IOM report "unequal treatment"	Betancourt, J.R., Maina, A.	Eliminating Healthcare Disparities in America: Beyond the IOM Report	2007	10.1007/978-1-59745-485-8_5	Scopus
Barriers to health care among patients admitted to the emergency department for ambulatory care sensitive conditions: a pilot study	Arrieta, M; Mularz, A	ETHNICITY & DISEASE	2007		WOS
Best practices for facilitating access to health care for children of the poor	Stipp, K.F.	Multidimensional Evidence-Based Practice: Synthesizing Knowledge, Research, and Values	2008	10.4324/9780203883723	Scopus
Best Practices for Reducing Unplanned Acute Care for Patients With Cancer	Handley, NR; Schuchter, LM; Bekelman, JE	JOURNAL OF ONCOLOGY PRACTICE	2018	10.1200/JOP.17.00081	WOS
BMJ Open Effectiveness of multidisciplinary team case management: Difference-indifferences analysis	Stokes, J., Kristensen, S.R., Checkland, K., Bower, P.	BMJ Open	2016	10.1136/bmjopen-2015-010468	Scopus
Call to action: APRNs in U.S. nursing homes to improve care and reduce costs	Rantz MJ, Birtley NM, Flesner M, Crecelius C, Murray C.	Nurs Outlook	2017	10.1016/j.outlook.2017.08.011	PubMed
Call to action: APRNs in U.S. nursing homes to improve care and reduce costs	Rantz, M.J., Birtley, N.M., Flesner, M., Crecelius, C., Murray, C.	Nursing Outlook	2017	10.1016/j.outlook.2017.08.011	Scopus
Call to action: APRNs in US nursing homes to improve care and reduce costs	Rantz, MJ; Birtley, NM; Flesner, M; Crecelius, C; Murray, C	NURSING OUTLOOK	2017	10.1016/j.outlook.2017.08.011	WOS
Can accountable care divert the sources of hospitalization?	Yoon J, Oakley LP, Luck J, Harvey SM.	Am J Manag Care	2019		PubMed
Can accountable care divert the sources of hospitalization?	Yoon, J., Oakley, L.P., Luck, J., Marie Harvey, S.	American Journal of Managed Care	2019		Scopus
Can Accountable Care Divert the Sources of Hospitalization?	Yoon, J; Oakley, LP; Luck, J; Harvey, SM	AMERICAN JOURNAL OF MANAGED CARE	2019		WOS
Can big data help us close an epilepsy care gap?	Baca, C.B., Barkley, G.L.	Neurology	2015	10.1212/WNL.0000000000001961	Scopus
Can big data help us close an epilepsy care gap?	Baca, CB; Barkley, GL	NEUROLOGY	2015	10.1212/WNL.0000000000001961	WOS
Can improving working partnerships with primary care prevent avoidable emergency admissions for patients with lung cancer?	Eaton, MA; Clayton, K; Phillips, S; Perkins, T; Griffiths, A; Denby, D; Roberts, J; Maddock, N; Pugh, B; Rees, P; Glover, S; McAdam, J; Rose, P; Anderson, V; Robinson, W; Morgan, SD; Beattie, V; Morley, J	LUNG CANCER	2018	10.1016/S0169-5002(18)30136-3	WOS
Can Improving Working Partnerships with Primary Care Prevent Avoidable Emergency Admissions for Patients with Lung Cancer?	Morley, J; Anderson, V; Beattie, V; Clayton, K; Denby, D; Eaton, M; Glover, S; Griffiths, A; Maddock, N; Mcadam, J; Morgan, S; Perkins, T; Phillips, S; Pugh, B; Rees, P; Roberts, J; Robinson, W; Rose, P	JOURNAL OF THORACIC ONCOLOGY	2018	10.1016/j.jtho.2018.08.1741	WOS
Can primary care access reduce health care utilization for patients with obesity-associated chronic conditions in medically underserved areas?	Dashputre, AA; Surbhi, S; Podila, PSB; Shuvo, SA; Bailey, JE	JOURNAL OF EVALUATION IN CLINICAL PRACTICE	2020	10.1111/jep.13360	WOS
Can the emergency department algorithm detect changes in access to care?	Lowe, RA; Fu, RW	ACADEMIC EMERGENCY MEDICINE	2008	10.1111/j.1553-2712.2008.00108.x	WOS
Canada: Health System Review	Marchildon GP, Allin S, Merkur S.	Health Syst Transit	2020		PubMed
Canada: Health System Review	Marchildon, G.P., Allin, S., Merkur, S.	Health systems in transition	2020		Scopus
Canadian ground ambulance services: Provincial funding and standards for equipment and training	Goldstein, D.H.	Canadian Medical Association Journal	1980		Scopus
Cardiovascular risk reduction in the workforce: Optimizing cholesterol management to reduce the burden of cardiovascular disease	Vogenberg, F.R., Fendrick, A.M.	American Journal of Pharmacy Benefits	2010		Scopus
Care Coordination Models and Tools-Systematic Review and Key Informant Interviews	Duan-Porter W, Ullman K, Majeski B, Miake-Lye I, Diem S, Wilt TJ.	J Gen Intern Med	2021	10.1007/s11606-021-07158-w	PubMed
Care Coordination Models and Tools-Systematic Review and Key Informant Interviews	Duan-Porter, W; Ullman, K; Majeski, B; Miake-Lye, I; Diem, S; Wilt, TJ	JOURNAL OF GENERAL INTERNAL MEDICINE		10.1007/s11606-021-07158-w	WOS
Care Coordination Models and Tools—Systematic Review and Key Informant Interviews	Duan-Porter, W., Ullman, K., Majeski, B., Miake-Lye, I., Diem, S., Wilt, T.J.	Journal of General Internal Medicine	2021	10.1007/s11606-021-07158-w	Scopus
Causes of unplanned hospital admissions: implications for practice and policy	Silver MP, Ferry RJ, Edmonds C.	Home Healthc Nurse	2010	10.1097/NHH.0b013e3181cb57e0	PubMed
Causes of unplanned hospital admissions: Implications for practice and policy	Silver, M.P., Ferry, R.J., Edmonds, C.	Home Healthcare Nurse	2010	10.1097/NHH.0b013e3181cb57e0	Scopus
Change in condition alerts for home care recipients: A stepped wedge cluster randomized trial	Hatfield, LA; Caudry, D; Grabowski, DC	JOURNAL OF THE AMERICAN GERIATRICS SOCIETY	2021	10.1111/jgs.17324	WOS
Changes in Costs of Hospitalizations of Adults Aged 18-64 Through the Emergency Department For Ambulatory Care Sensitive Conditions: 2003-2009	Dresden, S; Feinglass, J; Kang, R; Adams, J	ANNALS OF EMERGENCY MEDICINE	2012	10.1016/j.annemergmed.2012.06.177	WOS
Changes in Primary Care Telehealth Use and Impact on Acute Care Visits for Ambulatory Care-Sensitive Conditions during COVID-19	Li, K; Ng, S; Zhu, ZW; McCullough, J; Kocher, K; Ellimoottil, C	HEALTH SERVICES RESEARCH	2021		WOS
Changing hospital policy from the wards: an introduction to health policy education	Jacobsohn V, DeArman M, Moran P, Cross J, Dietz D, Allen R, Bachofer S, Dow-Velarde L, Kaufman A.	Acad Med	2008	10.1097/ACM.0b013e3181667d6e	PubMed
Changing hospital policy from the wards: An introduction to health policy education	Jacobsohn, V., DeArman, M., Moran, P., Cross, J., Dietz, D., Allen, R., Bachofer, S., Dow-Velarde, L., Kaufman, A.	Academic Medicine	2008	10.1097/ACM.0b013e3181667d6e	Scopus
Changing Hospital Policy from the Wards: An Introduction to Health Policy Education	Jacobsohn, V; DeArman, M; Moran, P; Cross, J; Dietz, D; Allen, R; Bachofer, S; Dow-Velarde, L; Kaufman, A	ACADEMIC MEDICINE	2008	10.1097/ACM.0b013e3181667d6e	WOS
Characteristics of all, occasional, and frequent emergency department visits due to ambulatory care-sensitive conditions in Florida	Chukmaitov AS, Tang A, Carretta HJ, Menachemi N, Brooks RG.	J Ambul Care Manage	2012	10.1097/JAC.0b013e318244d222	PubMed
Characteristics of all, occasional, and frequent emergency department visits due to ambulatory care-sensitive conditions in Florida	Chukmaitov, A.S., Tang, A., Carretta, H.J., Menachemi, N., Brooks, R.G.	Journal of Ambulatory Care Management	2012	10.1097/JAC.0b013e318244d222	Scopus
Characteristics of avoidable hospitalization in Spain	Sanchez, JLA; Vilalta, JS; Pereperez, SB; Martinez, IM	MEDICINA CLINICA	2004		WOS
Characteristics of avoidable hospitalization in Spain [Características de la hospitalización evitable en España]	Alfonso Sánchez, J.L., Sentís Vilalta, J., Blasco Perepérez, S., Martínez Martínez, I.	Medicina Clinica	2004	10.1157/13061386	Scopus
Characteristics of short general internal medicine hospital stays: a multicentre cross-sectional study	Verma AA, Guo Y, Kwan JL, Lapointe-Shaw L, Rawal S, Tang T, Weinerman A, Razak F.	CMAJ Open	2019	10.9778/cmajo.20180181	PubMed
Characteristics of trauma centers and trauma surgeons	Aprahamian, C., Wallace, J.R., Bergstein, J.M., Zeppa, R.	Journal of Trauma - Injury, Infection and Critical Care	1993	10.1097/00005373-199310000-00011	Scopus
Check up before you check out: Retail clinics and emergency room use	Alexander, D., Currie, J., Schnell, M.	Journal of Public Economics	2019	10.1016/j.jpubeco.2019.104050	Scopus
Check up before you check out: Retail clinics and emergency room use	Alexander, D; Currie, J; Schnell, M	JOURNAL OF PUBLIC ECONOMICS	2019	10.1016/j.jpubeco.2019.104050	WOS
Chronic and integrated care in Catalonia	Contel JC, Ledesma A, Blay C, Mestre AG, Cabezas C, Puigdollers M, Zara C, Amil P, Sarquella E, Constante C.	Int J Integr Care	2015	10.5334/ijic.2205	PubMed
Chronic and integrated care in Catalonia	Contel, JC; Ledesma, A; Blay, C; Mestre, AG; Cabezas, C; Puigdollers, M; Zara, C; Amil, P; Sarquella, E; Constante, C	INTERNATIONAL JOURNAL OF INTEGRATED CARE	2015		WOS
Chronic medical illness, depression, and use of acute medical services among Medicare beneficiaries	Himelhoch S, Weller WE, Wu AW, Anderson GF, Cooper LA.	Med Care	2004	10.1097/01.mlr.0000127998.89246.ef	PubMed
Chronic medical illness, depression, and use of acute medical services among medicare beneficiaries	Himelhoch, S., Weller, W.E., Wu, A.W., Anderson, G.F., Cooper, L.A.	Medical Care	2004	10.1097/01.mlr.0000127998.89246.ef	Scopus
Chronic medical illness, depression, and use of acute medical services among medicare beneficiaries	Himelhoch, S; Weller, WE; Wu, AW; Anderson, GF; Cooper, LA	MEDICAL CARE	2004	10.1097/01.mlr.0000127998.89246.ef	WOS
Chronic obstructive pulmonary disease: Emergency care in acute exacerbation	Welniak, T.J., Panzenbeck, A., Koyfman, A., Foran, M.	African Journal of Emergency Medicine	2015	10.1016/j.afjem.2014.08.002	Scopus
Chronic obstructive pulmonary disease: Emergency care in acute exacerbation	Welniak, TJ; Panzenbeck, A; Koyfman, A; Foran, M	AFRICAN JOURNAL OF EMERGENCY MEDICINE	2015	10.1016/j.afjem.2014.08.002	WOS
Clinical characteristics and preventable acute care spending among a high cost inpatient population	Ronksley, P.E., Kobewka, D.M., McKay, J.A., Rothwell, D.M., Mulpuru, S., Forster, A.J.	BMC Health Services Research	2016	10.1186/s12913-016-1418-2	Scopus
Clinical impact of advanced trauma life support	Van Olden, G.D.J., Dik Meeuwis, J., Bolhuis, H.W., Boxma, H., Goris, R.J.A.	American Journal of Emergency Medicine	2004	10.1016/j.ajem.2004.08.013	Scopus
Cluster Analysis of Acute Care Use Yields Insights for Tailored Pediatric Asthma Interventions	Abir, M., Truchil, A., Wiest, D., Nelson, D.B., Goldstick, J.E., Koegel, P., Lozon, M.M., Choi, H., Brenner, J.	Annals of Emergency Medicine	2017	10.1016/j.annemergmed.2017.06.024	Scopus
Co-ordination of health care: the case of hospital emergency admissions	Islam MK, Kjerstad E.	Eur J Health Econ	2019	10.1007/s10198-018-1015-x	PubMed
Co-ordination of health care: the case of hospital emergency admissions	Islam, M.K., Kjerstad, E.	European Journal of Health Economics	2019	10.1007/s10198-018-1015-x	Scopus
Co-ordination of health care: the case of hospital emergency admissions	Islam, MK; Kjerstad, E	EUROPEAN JOURNAL OF HEALTH ECONOMICS	2019	10.1007/s10198-018-1015-x	WOS
Cohort study of medical cannabis authorisation and healthcare utilisation in 2014-2017 in Ontario, Canada	Eurich D, Lee C, Zongo A, Minhas-Sandhu JK, Hanlon JG, Hyshka E, Dyck J.	J Epidemiol Community Health	2020	10.1136/jech-2019-212438	PubMed
Cohort study of medical cannabis authorisation and healthcare utilisation in 2014-2017 in Ontario, Canada	Eurich, D., Lee, C., Zongo, A., Minhas-Sandhu, J.K., Hanlon, J.G., Hyshka, E., Dyck, J.	Journal of epidemiology and community health	2020	10.1136/jech-2019-212438	Scopus
Cohort study of medical cannabis authorisation and healthcare utilisation in 2014-2017 in Ontario, Canada	Eurich, D., Lee, C., Zongo, A., Minhas-Sandhu, J.K., Hanlon, J.G., Hyshka, E., Dyck, J.	Journal of Epidemiology and Community Health	2019	10.1136/jech-2019-212438	Scopus
Cohort study of medical cannabis authorisation and healthcare utilisation in 2014-2017 in Ontario, Canada	Eurich, D; Lee, C; Zongo, A; Minhas-Sandhu, JK; Hanlon, JG; Elaine, H; Dyck, J	JOURNAL OF EPIDEMIOLOGY AND COMMUNITY HEALTH	2020	10.1136/jech-2019-212438	WOS
Cold Weather Conditions and Risk of Hypothermia Among People Experiencing Homelessness: Implications for Prevention Strategies	Zhang P, Wiens K, Wang R, Luong L, Ansara D, Gower S, Bassil K, Hwang SW.	Int J Environ Res Public Health	2019	10.3390/ijerph16183259	PubMed
Cold weather conditions and risk of hypothermia among people experiencing homelessness: Implications for prevention strategies	Zhang, P., Wiens, K., Wang, R., Luong, L., Ansara, D., Gower, S., Bassil, K., Hwang, S.W.	International Journal of Environmental Research and Public Health	2019	10.3390/ijerph16183259	Scopus
Cold Weather Conditions and Risk of Hypothermia Among People Experiencing Homelessness: Implications for Prevention Strategies	Zhang, P; Wiens, K; Wang, R; Luong, L; Ansara, D; Gower, S; Bassil, K; Hwang, SW	INTERNATIONAL JOURNAL OF ENVIRONMENTAL RESEARCH AND PUBLIC HEALTH	2019	10.3390/ijerph16183259	WOS
Commentary on medical group practice characteristics influencing inappropriate emergency department and avoidable hospitalization rates	Clifton G.	J Ambul Care Manage	2013	10.1097/JAC.0b013e3182a3e75b	PubMed
Commentary on medical group practice characteristics influencing Inappropriate Emergency Department and avoidable hospitalization rates	Clifton, G.	Journal of Ambulatory Care Management	2013	10.1097/JAC.0b013e3182a3e75b	Scopus
Community based service providers' perspectives on frequent and/or avoidable admission of older people with chronic disease in rural NSW: a qualitative study	Longman JM, Singer JB, Gao Y, Barclay LM, Passey ME, Pirotta JP, Heathcote KE, Ewald DP, Saberi V, Corben P, Morgan GG.	BMC Health Serv Res	2011	10.1186/1472-6963-11-265	PubMed
Community based service providers' perspectives on frequent and/or avoidable admission of older people with chronic disease in rural NSW: A qualitative study	Longman, J.M., Singer, J.B., Gao, Y., Barclay, L.M., Passey, M.E., Pirotta, J.P., Heathcote, K.E., Ewald, D.P., Saberi, V., Corben, P., Morgan, G.G.	BMC Health Services Research	2011	10.1186/1472-6963-11-265	Scopus
Community based service providers' perspectives on frequent and/or avoidable admission of older people with chronic disease in rural NSW: a qualitative study	Longman, JM; Singer, JB; Gao, Y; Barclay, LM; Passey, ME; Pirotta, JP; Heathcote, KE; Ewald, DP; Saberi, V; Corben, P; Morgan, GG	BMC HEALTH SERVICES RESEARCH	2011	10.1186/1472-6963-11-265	WOS
Comparative 4-year risk and type of hospital admission among homeless and housed emergency department attendees: longitudinal study of hospital records in England 2013-2018	Moss C, Sutton M, Cheraghi-Sohi S, Sanders C, Allen T.	BMJ Open	2021	10.1136/bmjopen-2021-049811	PubMed
Comparative 4-year risk and type of hospital admission among homeless and housed emergency department attendees: Longitudinal study of hospital records in England 2013-2018	Moss, C., Sutton, M., Cheraghi-Sohi, S., Sanders, C., Allen, T.	BMJ Open	2021	10.1136/bmjopen-2021-049811	Scopus
Comparative 4-year risk and type of hospital admission among homeless and housed emergency department attendees: longitudinal study of hospital records in England 2013-2018	Moss, C; Sutton, M; Cheraghi-Sohi, S; Sanders, C; Allen, T	BMJ OPEN	2021	10.1136/bmjopen-2021-049811	WOS
Comparative effectiveness of health centers as regular source of care: application of sentinel ACSC events as performance measures	Falik M, Needleman J, Herbert R, Wells B, Politzer R, Benedict MB.	J Ambul Care Manage	2006	10.1097/00004479-200601000-00004	PubMed
Comparative effectiveness of health centers as regular source of care: Application of sentinel ACSC events as performance measures	Falik, M., Needleman, J., Herbert, R., Wells, B., Politzer, R., Benedict, M.B.	Journal of Ambulatory Care Management	2006	10.1097/00004479-200601000-00004	Scopus
Comparing health care use and costs among new Medicaid enrollees before and during the COVID-19 pandemic	Wright B, Anderson D, Whitaker R, Shrader P, Bettger JP, Wong C, Shafer P.	BMC Health Serv Res	2021	10.1186/s12913-021-07027-6	PubMed
Comparing health care use and costs among new Medicaid enrollees before and during the COVID-19 pandemic	Wright, B., Anderson, D., Whitaker, R., Shrader, P., Bettger, J.P., Wong, C., Shafer, P.	BMC Health Services Research	2021	10.1186/s12913-021-07027-6	Scopus
Comparing health care use and costs among new Medicaid enrollees before and during the COVID-19 pandemic	Wright, B; Anderson, D; Whitaker, R; Shrader, P; Bettger, JP; Wong, C; Shafer, P	BMC HEALTH SERVICES RESEARCH	2021	10.1186/s12913-021-07027-6	WOS
Comparing neighborhood-based indices of socioeconomic risk factors and potentially preventable emergency department utilization	Carlson LC, Kim J, Samuels-Kalow ME, Yun BJ, Terry DF, Weilburg JB, Lee J.	Am J Emerg Med	2021	10.1016/j.ajem.2020.03.035	PubMed
Comparing neighborhood-based indices of socioeconomic risk factors and potentially preventable emergency department utilization	Carlson, L.C., Kim, J., Samuels-Kalow, M.E., Yun, B.J., Terry, D.F., Weilburg, J.B., Lee, J.	American Journal of Emergency Medicine	2021	10.1016/j.ajem.2020.03.035	Scopus
Comparing neighborhood-based indices of socioeconomic risk factors and potentially preventable emergency department utilization	Carlson, LC; Kim, J; Samuels-Kalow, ME; Yun, BJ; Terry, DF; Weilburg, JB; Lee, JE	AMERICAN JOURNAL OF EMERGENCY MEDICINE	2021	10.1016/j.ajem.2020.03.035	WOS
Comparing Preventable Acute Care Use of Rural Versus Urban Americans: an Observational Study of National Rates During 2008-2017	Johnston KJ, Wen H, Kotwal A, Joynt Maddox KE.	J Gen Intern Med	2021	10.1007/s11606-020-06532-4	PubMed
Comparing Preventable Acute Care Use of Rural Versus Urban Americans: an Observational Study of National Rates During 2008-2017	Johnston, KJ; Wen, HF; Kotwal, A; Maddox, KJE	JOURNAL OF GENERAL INTERNAL MEDICINE	2021	10.1007/s11606-020-06532-4	WOS
Comparing Preventable Acute Care Use of Rural Versus Urban Americans: an Observational Study of National Rates During 2008–2017	Johnston, K.J., Wen, H., Kotwal, A., Joynt Maddox, K.E.	Journal of General Internal Medicine	2021	10.1007/s11606-020-06532-4	Scopus
Comparison of deep learning with traditional models to predict preventable acute care use and spending among heart failure patients	Lewis M, Elad G, Beladev M, Maor G, Radinsky K, Hermann D, Litani Y, Geller T, Pines JM, Shapiro NL, Figueroa JF.	Sci Rep	2021	10.1038/s41598-020-80856-3	PubMed
Comparison of deep learning with traditional models to predict preventable acute care use and spending among heart failure patients	Lewis, M., Elad, G., Beladev, M., Maor, G., Radinsky, K., Hermann, D., Litani, Y., Geller, T., Pines, J.M., Shapiro, N., Figueroa, J.F.	Scientific Reports	2021	10.1038/s41598-020-80856-3	Scopus
Comparison of deep learning with traditional models to predict preventable acute care use and spending among heart failure patients	Lewis, M; Elad, G; Beladev, M; Maor, G; Radinsky, K; Hermann, D; Litani, Y; Geller, T; Pines, JM; Shapiro, NL; Figueroa, JF	SCIENTIFIC REPORTS	2021	10.1038/s41598-020-80856-3	WOS
Comparison of quality control for trauma management between Western and Eastern European trauma center	Calderale SM, Sandru R, Tugnoli G, Di Saverio S, Beuran M, Ribaldi S, Coletti M, Gambale G, Paun S, Russo L, Baldoni F.	World J Emerg Surg	2008	10.1186/1749-7922-3-32	PubMed
Comparison of quality control for trauma management between western and eastern European trauma center	Calderale, S.M., Sandru, R., Tugnoli, G., Di Saverio, S., Beuran, M., Ribaldi, S., Coletti, M., Gambale, G., Paun, S., Russo, L., Baldoni, F.	World Journal of Emergency Surgery	2008	10.1186/1749-7922-3-32	Scopus
Comparison of quality control for trauma management between Western and Eastern European trauma center	Calderale, SM; Sandru, R; Tugnoli, G; Di Saverio, S; Beuran, M; Ribaldi, S; Coletti, M; Gambale, G; Paun, S; Russo, L; Baldoni, F	WORLD JOURNAL OF EMERGENCY SURGERY	2008	10.1186/1749-7922-3-32	WOS
Competing health care systems and complex patients: An inter-professional collaboration to improve outcomes and reduce health care costs	Hardin, L., Kilian, A., Spykerman, K.	Journal of Interprofessional Education and Practice	2017	10.1016/j.xjep.2017.01.002	Scopus
Concentration of potentially preventable spending among high-cost medicare subpopulations	Figueroa, J.F., Maddox, K.E.J., Beaulieu, N., Wild, R.C., Jha, A.K.	Annals of Internal Medicine	2017	10.7326/M17-0767	Scopus
Concentration of Potentially Preventable Spending Among High-Cost Medicare Subpopulations An Observational Study	Figueroa, JF; Maddox, KEJ; Beaulieu, N; Wild, RC; Jha, AK	ANNALS OF INTERNAL MEDICINE	2017	10.7326/M17-0767	WOS
Concentration of Potentially Preventable Spending Among High-Cost Medicare Subpopulations: An Observational Study	Figueroa JF, Joynt Maddox KE, Beaulieu N, Wild RC, Jha AK.	Ann Intern Med	2017	10.7326/M17-0767	PubMed
CONECT-6: a case-finding tool to identify patients with complex health needs	Hudon C, Bisson M, Dubois MF, Chiu Y, Chouinard MC, Dubuc N, Elazhary N, Sabourin V, Vanasse A.	BMC Health Serv Res	2021	10.1186/s12913-021-06154-4	PubMed
CONECT-6: a case-finding tool to identify patients with complex health needs	Hudon, C., Bisson, M., Dubois, M.-F., Chiu, Y., Chouinard, M.-C., Dubuc, N., Elazhary, N., Sabourin, V., Vanasse, A.	BMC Health Services Research	2021	10.1186/s12913-021-06154-4	Scopus
CONECT-6: a case-finding tool to identify patients with complex health needs	Hudon, C; Bisson, M; Dubois, MF; Chiu, Y; Chouinard, MC; Dubuc, N; Elazhary, N; Sabourin, V; Vanasse, A	BMC HEALTH SERVICES RESEARCH	2021	10.1186/s12913-021-06154-4	WOS
Consensus-Derived Interventions to Reduce Acute Care Transfer (INTERACT)-Compatible Order Sets for Common Conditions Associated with Potentially Avoidable Hospitalizations	Ouslander, JG; Handler, SM	JOURNAL OF THE AMERICAN MEDICAL DIRECTORS ASSOCIATION	2015	10.1016/j.jamda.2015.02.016	WOS
Constraining Medicare home health reimbursement: What are the outcomes?	McCall, N; Korb, J; Petersons, A; Moore, S	HEALTH CARE FINANCING REVIEW	2002		WOS
Construction of a Frailty Indicator with Partially Ordered Sets: A Multiple-Outcome Proposal Based on Administrative Healthcare Data	Silan, M., Signorin, G., Ferracin, E., Listorti, E., Spadea, T., Costa, G., Boccuzzo, G.	Social Indicators Research	2020	10.1007/s11205-020-02512-7	Scopus
Construction of a Frailty Indicator with Partially Ordered Sets: A Multiple-Outcome Proposal Based on Administrative Healthcare Data	Silan, M; Signorin, G; Ferracin, E; Listorti, E; Spadea, T; Costa, G; Boccuzzo, G	SOCIAL INDICATORS RESEARCH		10.1007/s11205-020-02512-7	WOS
Contact with primary health care physicians before an acute hospitalisation	Skarshaug, LJ; Svedahl, ER; Bjorngaard, JH; Steinsbekk, A; Pape, K	SCANDINAVIAN JOURNAL OF PRIMARY HEALTH CARE	2019	10.1080/02813432.2019.1639900	WOS
Continuity of Care and Avoidable Hospitalizations for Chronic Obstructive Pulmonary Disease (COPD)	Lin, IP; Wu, SAC; Huang, ST	JOURNAL OF THE AMERICAN BOARD OF FAMILY MEDICINE	2015	10.3122/jabfm.2015.02.140141	WOS
Continuity of Care and Health Care Utilization in Older Adults With Dementia in Fee-for-Service Medicare	Amjad H, Carmichael D, Austin AM, Chang CH, Bynum JP.	JAMA Intern Med	2016	10.1001/jamainternmed.2016.3553	PubMed
Continuity of care and health care utilization in older adults with dementia in fee-for-service medicare	Amjad, H., Carmichael, D., Austin, A.M., Chang, C.-H., Bynum, J.P.W.	JAMA Internal Medicine	2016	10.1001/jamainternmed.2016.3553	Scopus
Continuity of Care and Health Care Utilization in Older Adults With Dementia in Fee-for-Service Medicare	Amjad, H; Carmichael, D; Austin, AM; Chang, CH; Bynum, JPW	JAMA INTERNAL MEDICINE	2016	10.1001/jamainternmed.2016.3553	WOS
Continuity of Care and the Risk of Preventable Hospitalization in Older Adults	Nyweide, DJ; Anthony, DL; Bynum, JPW; Strawderman, RL; Weeks, WB; Casalino, LP; Fisher, ES	JAMA INTERNAL MEDICINE	2013	10.1001/jamainternmed.2013.10059	WOS
Continuity of care for newly diagnosed diabetic patients: A population-based study	Li, YC	PLOS ONE	2019	10.1371/journal.pone.0221327	WOS
Continuity of care, measurement and association with hospital admission and mortality: a registry-based longitudinal cohort study	Hetlevik Ø, Holmås TH, Monstad K.	BMJ Open	2021	10.1136/bmjopen-2021-051958	PubMed
Continuity of care, measurement and association with hospital admission and mortality: a registry-based longitudinal cohort study	Hetlevik, O; Holmas, TH; Monstad, K	BMJ OPEN	2021	10.1136/bmjopen-2021-051958	WOS
Continuity of insurance coverage and ambulatory care-sensitive hospitalizations/ED visits: Evidence from the children's health insurance program	Becker, D.J., Blackburn, J.L., Kilgore, M.L., Morrisey, M.A., Sen, B., Caldwell, C., Menachemi, N.	Clinical Pediatrics	2011	10.1177/0009922811410229	Scopus
Continuity of outpatient care and avoidable hospitalization: A systematic review	Kao, Y.-H., Lin, W.-T., Chen, W.-H., Wu, S.-C., Tseng, T.-S.	American Journal of Managed Care	2019		Scopus
Continuity of Outpatient Care and Avoidable Hospitalization: A Systematic Review	Kao, YH; Lin, WT; Chen, WH; Wu, SC; Tseng, TS	AMERICAN JOURNAL OF MANAGED CARE	2019		WOS
Contribution of preventable acute care spending to total spending for high-cost	Joynt, K.E., Gawande, A.A., Orav, E.J., Jha, A.K.	JAMA - Journal of the American Medical Association	2013	10.1001/jama.2013.7103	Scopus
Contribution of preventable acute care spending to total spending for high-cost Medicare patients	Joynt KE, Gawande AA, Orav EJ, Jha AK.	JAMA	2013	10.1001/jama.2013.7103	PubMed
Contribution of Preventable Acute Care Spending to Total Spending for High-Cost Medicare Patients	Joynt, KE; Gawande, AA; Orav, EJ; Jha, AK	JAMA-JOURNAL OF THE AMERICAN MEDICAL ASSOCIATION	2013	10.1001/jama.2013.7103	WOS
Correction to Remdesivir: A Review of Its Discovery and Development Leading to Human Clinical Trials for Treatment of COVID-19	Eastman RT, Roth JS, Brimacombe KR, Simeonov A, Shen M, Patnaik S, Hall MD.	ACS Cent Sci	2020	10.1021/acscentsci.0c00747	PubMed
Cost analysis of the use of emergency departments for primary care services in Charlotte, North Carolina	McWilliams A, Tapp H, Barker J, Dulin M.	N C Med J	2011		PubMed
Cost analysis of the use of emergency departments for primary care services in Charlotte, North Carolina.	McWilliams, A., Tapp, H., Barker, J., Dulin, M.	North Carolina medical journal	2011		Scopus
Cost of non-compliance [Kosten der non-compliance]	Volmer, T., Kielhorn, A.	Gesundheitsokonomie und Qualitatsmanagement	1999		Scopus
Cost, utilization, and quality of care: an evaluation of illinois' medicaid primary care case management program	Phillips RL Jr, Han M, Petterson SM, Makaroff LA, Liaw WR.	Ann Fam Med	2014	10.1370/afm.1690	PubMed
Cost, Utilization, and Quality of Care: An Evaluation of Illinois' Medicaid Primary Care Case Management Program	Phillips, RL; Han, MY; Petterson, SM; Makaroff, L; Liaw, WR	ANNALS OF FAMILY MEDICINE	2014	10.1370/afm.1690	WOS
Cost, utilization, and quality of care: An evaluation of illinois’ medicaid primary care case management program	Phillips, R.L., Han, M., Petterson, S.M., Makaroff, L., Liaw, W.R.	Annals of Family Medicine	2014	10.1370/afm.1690	Scopus
Costs and clinical quality among Medicare beneficiaries: associations with health center penetration of low-income residents	Sharma R, Lebrun-Harris LA, Ngo-Metzger Q.	Medicare Medicaid Res Rev	2014	10.5600/mmrr.004.03.a05	PubMed
Costs and clinical quality among medicare beneficiaries: Associations with health center penetration of low-income residents	Sharma, R.	Medicare and Medicaid Research Review	2014	10.5600/mmrr.004.03.a05	Scopus
Costs associated with ambulatory care sensitive conditions across hospital-based settings	Galarraga JE, Mutter R, Pines JM.	Acad Emerg Med	2015	10.1111/acem.12579	PubMed
Costs associated with ambulatory care sensitive conditions across hospital-based settings	Galarraga, J.E., Mutter, R., Pines, J.M.	Academic Emergency Medicine	2015	10.1111/acem.12579	Scopus
Costs Associated with Ambulatory Care Sensitive Conditions Across Hospital-based Settings	Galarraga, JE; Mutter, R; Pines, JM	ACADEMIC EMERGENCY MEDICINE	2015	10.1111/acem.12579	WOS
Costs of chronic patient management program in a healthcare provider organization [Custos do Programa de Gerenciamento de Doentes Crônicos de uma operadora de saúde]	Silva, S.L., Tolentino, A.C., Santiago, L.C., Marta, C.B., Peregrino, A.A.D.F., Schutz, V.	Revista Enfermagem	2016	10.12957/reuerj.2016.21937	Scopus
Costs of ED episodes of care in the United States	Galarraga JE, Pines JM.	Am J Emerg Med	2016	10.1016/j.ajem.2015.06.001	PubMed
Costs of ED episodes of care in the United States	Galarraga, J.E., Pines, J.M.	American Journal of Emergency Medicine	2016	10.1016/j.ajem.2015.06.001	Scopus
Costs of ED episodes of care in the United States	Galarraga, JE; Pines, JM	AMERICAN JOURNAL OF EMERGENCY MEDICINE	2016	10.1016/j.ajem.2015.06.001	WOS
COVID-19 and emergencies in patients with diabetes: two case reports	Dey RK, Hilmy AI, Imad HA, Yoosuf AA, Latheef AA.	J Med Case Rep	2021	10.1186/s13256-020-02659-4	PubMed
COVID-19 and emergencies in patients with diabetes: two case reports	Dey, R.K., Hilmy, A.I., Imad, H.A., Yoosuf, A.A., Latheef, A.A.	Journal of Medical Case Reports	2021	10.1186/s13256-020-02659-4	Scopus
COVID-19 and emergencies in patients with diabetes: two case reports	Dey, RK; Hilmy, AI; Imad, HA; Yoosuf, AA; Latheef, AA	JOURNAL OF MEDICAL CASE REPORTS	2021	10.1186/s13256-020-02659-4	WOS
COVID-19 as an occupational disease	Alici, NS; Beyan, AC; Simsek, C	EURASIAN JOURNAL OF PULMONOLOGY	2020	10.4103/ejop.ejop_50_20	WOS
COVID-19 pandemic: a wake-up call for lifestyle-related preventable conditions in older adults	Lim MA, Smith L.	Aging Clin Exp Res	2021	10.1007/s40520-021-01915-x	PubMed
COVID-19 pandemic: a wake-up call for lifestyle-related preventable conditions in older adults	Lim, M.A., Smith, L.	Aging Clinical and Experimental Research	2021	10.1007/s40520-021-01915-x	Scopus
COVID-19 pandemic: a wake-up call for lifestyle-related preventable conditions in older adults	Lim, MA; Smith, L	AGING CLINICAL AND EXPERIMENTAL RESEARCH	2021	10.1007/s40520-021-01915-x	WOS
COVID-19 risk: Adult Medicaid beneficiaries with autism, intellectual disability, and mental health conditions	Schott W, Tao S, Shea L.	Autism	2021	10.1177/13623613211039662	PubMed
COVID-19 risk: Adult Medicaid beneficiaries with autism, intellectual disability, and mental health conditions	Schott, W., Tao, S., Shea, L.	Autism	2021	10.1177/13623613211039662	Scopus
COVID-19 risk: Adult Medicaid beneficiaries with autism, intellectual disability, and mental health conditions	Schott, W; Tao, S; Shea, L	AUTISM		10.1177/13623613211039662	WOS
COVID-19-Induced Diabetic Ketoacidosis in an Adult with Latent Autoimmune Diabetes	Omotosho YB, Ying GW, Stolar M, Mallari AJP.	Cureus	2021	10.7759/cureus.12690	PubMed
COVID-19-Induced Diabetic Ketoacidosis in an Adult with Latent Autoimmune Diabetes	Omotosho, YB; Ying, GW; Stolar, M; Mallari, AJP	CUREUS	2021	10.7759/cureus.12690	WOS
Creation and implementation of an emergency general surgery registry modeled after the National Trauma Data Bank	Becher, R.D., Meredith, J.W., Chang, M.C., Hoth, J.J., Beard, H.R., Miller, P.R.	Journal of the American College of Surgeons	2012	10.1016/j.jamcollsurg.2011.11.001	Scopus
Cross-sector collaboration for vulnerable populations reduces utilization and strengthens community partnerships	Hardin, L., Trumbo, S., Wiest, D.	Journal of Interprofessional Education and Practice	2020	10.1016/j.xjep.2019.100291	Scopus
Cumulative social disadvantage and hospitalisations due to ambulatory care-sensitive conditions in Finland in 2011-2013: a register study	Lumme, S; Manderbacka, K; Arffman, M; Karvonen, S; Keskimaki, I	BMJ OPEN	2020	10.1136/bmjopen-2020-038338	WOS
Dangerous Liquidity and the Demand for Health Care Evidence from the 2008 Stimulus Payments	Gross, T; Tobacman, J	JOURNAL OF HUMAN RESOURCES	2014		WOS
Dangerous liquidity and the demand for health care: Evidence from the 2008 stimulus payments	Gross, T., Tobacman, J.	Journal of Human Resources	2014	10.3368/jhr.49.2.424	Scopus
Data envelopment analysis applications on primary health care using exogenous variables and health outcomes	González-De-julián, S., Barrachina-Martínez, I., Vivas-Consuelo, D., Bonet-Pla, Á., Usó-Talamantes, R.	Sustainability (Switzerland)	2021	10.3390/su13031337	Scopus
Data Envelopment Analysis Applications on Primary Health Care Using Exogenous Variables and Health Outcomes	Gonzalez-de-Julian, S; Barrachina-Martinez, I; Vivas-Consuelo, D; Bonet-Pla, A; Uso-Talamantes, R	SUSTAINABILITY	2021	10.3390/su13031337	WOS
Deaths, Hospitalizations, and Emergency Department Visits From Food-Related Anaphylaxis, New York City, 2000-2014: Implications for Fatality Prevention	Poirot E, He F, Gould LH, Hadler JL.	J Public Health Manag Pract	2020	10.1097/PHH.0000000000001137	PubMed
Deaths, hospitalizations, and emergency department visits from food-related anaphylaxis, New York City, 2000-2014: Implications for fatality prevention	Poirot, E., He, F., Hannah Gould, L., Hadler, J.L.	Journal of Public Health Management and Practice	2020	10.1097/PHH.0000000000001137	Scopus
Deaths, Hospitalizations, and Emergency Department Visits From Food-Related Anaphylaxis, New York City, 2000-2014: Implications for Fatality Prevention	Poirot, E; He, FT; Gould, LH; Hadler, JL	JOURNAL OF PUBLIC HEALTH MANAGEMENT AND PRACTICE	2020	10.1097/PHH.0000000000001137	WOS
Decomposing Urban and Rural Disparities of Preventable ED Visits Among Patients With Alzheimer's Disease and Related Dementias: Evidence of the Availability of Health Care Resources	Wang N, Albaroudi A, Chen J.	J Rural Health	2021	10.1111/jrh.12465	PubMed
Decomposing Urban and Rural Disparities of Preventable ED Visits Among Patients With Alzheimer's Disease and Related Dementias: Evidence of the Availability of Health Care Resources	Wang, N., Albaroudi, A., Chen, J.	Journal of Rural Health	2021	10.1111/jrh.12465	Scopus
Decomposing Urban and Rural Disparities of Preventable ED Visits Among Patients With Alzheimer's Disease and Related Dementias: Evidence of the Availability of Health Care Resources	Wang, NY; Albaroudi, A; Chen, J	JOURNAL OF RURAL HEALTH	2021	10.1111/jrh.12465	WOS
Decreasing avoidable hospital admissions with the implementation of an emergency department case management program	Sharieff GQ, Cantonis M, Tressler M, Whitehead M, Russe J, Lovell E.	Am J Med Qual	2014	10.1177/1062860613491822	PubMed
Decreasing Avoidable Hospital Admissions With the Implementation of an Emergency Department Case Management Program	Sharieff, G.Q., Cantonis, M., Tressler, M., Whitehead, M., Russe, J., Lovell, E.	American Journal of Medical Quality	2014	10.1177/1062860613491822	Scopus
Decreasing Avoidable Hospital Admissions With the Implementation of an Emergency Department Case Management Program	Sharieff, GQ; Cantonis, M; Tressler, M; Whitehead, M; Russe, J; Lovell, E	AMERICAN JOURNAL OF MEDICAL QUALITY	2014	10.1177/1062860613491822	WOS
Degree of Implementation of the Interventions to Reduce Acute Care Transfers (INTERACT) Quality Improvement Program Associated with Number of Hospitalizations	Huckfeldt PJ, Kane RL, Yang Z, Engstrom G, Tappen R, Rojido C, Newman D, Reyes B, Ouslander JG.	J Am Geriatr Soc	2018	10.1111/jgs.15476	PubMed
Degree of Implementation of the Interventions to Reduce Acute Care Transfers (INTERACT) Quality Improvement Program Associated with Number of Hospitalizations	Huckfeldt, P.J., Kane, R.L., Yang, Z., Engstrom, G., Tappen, R., Rojido, C., Newman, D., Reyes, B., Ouslander, J.G.	Journal of the American Geriatrics Society	2018	10.1111/jgs.15476	Scopus
Degree of Implementation of the Interventions to Reduce Acute Care Transfers (INTERACT) Quality Improvement Program Associated with Number of Hospitalizations	Huckfeldt, PJ; Kane, RL; Yang, ZY; Engstrom, G; Tappen, R; Rojido, C; Newman, D; Reyes, B; Ouslander, JG	JOURNAL OF THE AMERICAN GERIATRICS SOCIETY	2018	10.1111/jgs.15476	WOS
Delay or Avoidance of Medical Care Because of COVID-19-Related Concerns - United States, June 2020	Czeisler MÉ, Marynak K, Clarke KEN, Salah Z, Shakya I, Thierry JM, Ali N, McMillan H, Wiley JF, Weaver MD, Czeisler CA, Rajaratnam SMW, Howard ME.	MMWR Morb Mortal Wkly Rep	2020	10.15585/mmwr.mm6936a4	PubMed
Delayed emergencies: The composition and magnitude of non-respiratory emergency department visits during the COVID-19 pandemic	Friedman AB, Barfield D, David G, Diller T, Gunnarson C, Liu M, Vicidomina BV, Zhang R, Zhang Y, Nigam SC.	J Am Coll Emerg Physicians Open	2021	10.1002/emp2.12349	PubMed
Delayed emergencies: The composition and magnitude of non-respiratory emergency department visits during the COVID-19 pandemic	Friedman, AB; Barfield, D; David, G; Diller, T; Gunnarson, C; Liu, M; Vicidomina, BV; Zhang, R; Zhang, Y; Nigam, SC	JOURNAL OF THE AMERICAN COLLEGE OF EMERGENCY PHYSICIANS OPEN	2021	10.1002/emp2.12349	WOS
Dental conditions associated with preventable hospital admissions in Australia: a systematic literature review	Acharya A, Khan S, Hoang H, Bettiol S, Goldberg L, Crocombe L.	BMC Health Serv Res	2018	10.1186/s12913-018-3733-2	PubMed
Dental conditions associated with preventable hospital admissions in Australia: a systematic literature review	Acharya, A; Khan, S; Hoang, H; Bettiol, S; Goldberg, L; Crocombe, L	BMC HEALTH SERVICES RESEARCH	2018	10.1186/s12913-018-3733-2	WOS
Dental conditions associated with preventable hospital admissions in Australia: A systematic literature review 11 Medical and Health Sciences 1117 Public Health and Health Services	Acharya, A., Khan, S., Hoang, H., Bettiol, S., Goldberg, L., Crocombe, L.	BMC Health Services Research	2018	10.1186/s12913-018-3733-2	Scopus
Deprivation influences the emergency admission rate of ambulatory care sensitive conditions	Conway R, O'Riordan D, Byrne D, Cournane S, Coveney S, Silke B.	Clin Med (Lond)	2016	10.7861/clinmedicine.16-2-119	PubMed
Deprivation influences the emergency admission rate of ambulatory care sensitive conditions	Conway, R., O'Riordan, D., Byrne, D., Cournane, S., Coveney, S., Silke, B.	Clinical Medicine, Journal of the Royal College of Physicians of London	2016	10.7861/clinmedicine.16-2-119	Scopus
Deprivation influences the emergency admission rate of ambulatory care sensitive conditions	Conway, R; O'Riordan, D; Byrne, D; Cournane, S; Coveney, S; Silke, B	CLINICAL MEDICINE	2016	10.7861/clinmedicine.16-2-119	WOS
Determining when a hospital admission of an older person can be avoided in a subacute setting: a systematic review and concept analysis	Huntley, A.L., Davies, B., Jones, N., Rooney, J., Goyder, P., Purdy, S., Baxter, H.	Journal of Health Services Research and Policy	2020	10.1177/1355819619886885	Scopus
Determining when a hospital admission of an older person can be avoided in a subacute setting: a systematic review and concept analysis	Huntley, AL; Davies, B; Jones, N; Rooney, J; Goyder, P; Purdy, S; Baxter, H	JOURNAL OF HEALTH SERVICES RESEARCH & POLICY	2020	10.1177/1355819619886885	WOS
Development and application of indicators for the reduction of potentially preventable hospital admissions related to medications	Warle-van Herwaarden, MF; Valkhoff, VE; Teichert, M; Koffeman, AR; 't Jong, GW; Sturkenboom, MCJM; De Smet, PAGM	EXPERT OPINION ON DRUG SAFETY	2014	10.1517/14740338.2014.867015	WOS
Development and Validation of the Agency for Healthcare Research and Quality Measures of Potentially Preventable Emergency Department (ED) Visits: The ED Prevention Quality Indicators for General Health Conditions	Davies S, Schultz E, Raven M, Wang NE, Stocks CL, Delgado MK, McDonald KM.	Health Serv Res	2017	10.1111/1475-6773.12687	PubMed
Development and Validation of the Agency for Healthcare Research and Quality Measures of Potentially Preventable Emergency Department (ED) Visits: The ED Prevention Quality Indicators for General Health Conditions	Davies, S., Schultz, E., Raven, M., Wang, N.E., Stocks, C.L., Delgado, M.K., McDonald, K.M.	Health Services Research	2017	10.1111/1475-6773.12687	Scopus
Development and Validation of the Agency for Healthcare Research and Quality Measures of Potentially Preventable Emergency Department (ED) Visits: The ED Prevention QualityIndicators for General Health Conditions	Davies, S; Schultz, E; Raven, M; Wang, NE; Stocks, CL; Delgado, MK; McDonald, KM	HEALTH SERVICES RESEARCH	2017	10.1111/1475-6773.12687	WOS
Development of a Set of Lupus-Specific, Ambulatory Care-Sensitive, Potentially Preventable Adverse Conditions: A Delphi Consensus Study	Feldman, CH; Speyer, C; Ashby, R; Bermas, BL; Bhattacharyya, S; Chakravarty, E; Everett, B; Ferucci, E; Hersh, AO; Marty, FM; Merola, JF; Ramsey-Goldman, R; Rovin, BH; Son, MB; Tarter, L; Waikar, S; Yazdany, J; Weissman, JS; Costenbader, KH	ARTHRITIS CARE & RESEARCH	2021	10.1002/acr.24095	WOS
Development of an automated model to predict the risk of elderly emergency medical admissions within a month following an index hospital visit: a Hong Kong experience	Tsui E, Au SY, Wong CP, Cheung A, Lam P.	Health Informatics J	2015	10.1177/1460458213501095	PubMed
Development of an automated model to predict the risk of elderly emergency medical admissions within a month following an index hospital visit: A Hong Kong experience	Tsui, E., Au, S.Y., Wong, C.P., Cheung, A., Lam, P.	Health Informatics Journal	2015	10.1177/1460458213501095	Scopus
Development of an automated model to predict the risk of elderly emergency medical admissions within a month following an index hospital visit: A Hong Kong experience	Tsui, E; Au, SY; Wong, CP; Cheung, A; Lam, P	HEALTH INFORMATICS JOURNAL	2015	10.1177/1460458213501095	WOS
Development of an Early Warning System to Prevent Crises in the Palliative Home Care Setting of Patients and Their Informal Caregivers: Protocol for a Mixed Method Study	Fringer A, Arrer E, Maier E, Schnepp W, Ulmer T.	JMIR Res Protoc	2019	10.2196/13933	PubMed
Development of an early warning system to prevent crises in the palliative home care setting of patients and their informal caregivers: Protocol for a mixed method study	Fringer, A., Arrer, E., Maier, E., Schnepp, W., Ulmer, T.	JMIR Research Protocols	2019	10.2196/13933	Scopus
Development of an Early Warning System to Prevent Crises in the Palliative Home Care Setting of Patients and Their Informal Caregivers: Protocol for a Mixed Method Study	Fringer, A; Arrer, E; Maier, E; Schnepp, W; Ulmer, T	JMIR RESEARCH PROTOCOLS	2019	10.2196/13933	WOS
Development of an Emergency Department Violence Intervention Program for Youth: An Integrated Knowledge Translation Approach	Snider C, Woodward H, Mordoch E, Chernomas W, Mahmood J, Wiebe F, Cook K, Jiang D, Strome T, Logsetty S.	Prog Community Health Partnersh	2016	10.1353/cpr.2016.0033	PubMed
Development of an emergency department violence intervention program for youth: An integrated knowledge translation approach	Snider, C., Woodward, H., Mordoch, E., Chernomas, W., Mahmood, J., Wiebe, F., Cook, K., Jiang, D., Strome, T., Logsetty, S.	Progress in Community Health Partnerships: Research, Education, and Action	2016	10.1353/cpr.2016.0033	Scopus
Development of an Emergency Department Violence Intervention Program for Youth: An Integrated Knowledge Translation Approach	Snider, C; Woodward, H; Mordoch, E; Chernomas, W; Mahmood, J; Wiebe, F; Cook, K; Jiang, DP; Strome, T; Logsetty, S	PROGRESS IN COMMUNITY HEALTH PARTNERSHIPS-RESEARCH EDUCATION AND ACTION	2016		WOS
Development of an Oncology Acute Care Risk Prediction Model	Csik VP, Li M, Binder AF, Handley NR.	JCO Clin Cancer Inform	2021	10.1200/CCI.20.00146	PubMed
Development of an Oncology Acute Care Risk Prediction Model	Csik, V.P., Li, M., Binder, A.F., Handley, N.R.	JCO clinical cancer informatics	2021	10.1200/CCI.20.00146	Scopus
Development of core outcome sets for effectiveness trials of interventions to prevent and/or treat delirium (Del-COrS): Study protocol	Rose, L., Agar, M., Burry, L.D., Campbell, N., Clarke, M., Lee, J., Siddiqi, N., Page, V.J.	BMJ Open	2017	10.1136/bmjopen-2017-016371	Scopus
Development of the Carers' Alert Thermometer (CAT) to identify family carers struggling with caring for someone dying at home: a mixed method consensus study	Knighting K, O'Brien MR, Roe B, Gandy R, Lloyd-Williams M, Nolan M, Jack BA.	BMC Palliat Care	2015	10.1186/s12904-015-0010-6	PubMed
Development of the Carers' Alert Thermometer (CAT) to identify family carers struggling with caring for someone dying at home: A mixed method consensus study	Knighting, K., O'Brien, M.R., Roe, B., Gandy, R., Lloyd-Williams, M., Nolan, M., Jack, B.A.	BMC Palliative Care	2015	10.1186/s12904-015-0010-6	Scopus
Development of the Carers' Alert Thermometer (CAT) to identify family carers struggling with caring for someone dying at home: a mixed method consensus study	Knighting, K; O'Brien, MR; Roe, B; Gandy, R; Lloyd-Williams, M; Nolan, M; Jack, BA	BMC PALLIATIVE CARE	2015	10.1186/s12904-015-0010-6	WOS
Diabetes mellitus in Mexico. Status of the epidemic	Hernandez-Avila, M; Gutierrez, JP; Reynoso-Noveron, N	SALUD PUBLICA DE MEXICO	2013	10.21149/spm.v55s2.5108	WOS
Diabetes mellitus in Mexico. Status of the epidemic [Diabetes mellitus en México. El estado de la epidemia]	Herańndez-Ávila, M., Gutiérrez Dr., J.P., Reynoso-Noverón, N.	Salud Publica de Mexico	2013	10.21149/spm.v55s2.5108	Scopus
Diabetic Ketoacidosis in COVID-19: Unique Concerns and Considerations	Palermo NE, Sadhu AR, McDonnell ME.	J Clin Endocrinol Metab	2020	10.1210/clinem/dgaa360	PubMed
Diabetic Ketoacidosis in COVID-19: Unique Concerns and Considerations	Palermo, N.E., Sadhu, A.R., McDonnell, M.E.	Journal of Clinical Endocrinology and Metabolism	2020	10.1210/clinem/dgaa360	Scopus
Diabetic Ketoacidosis in COVID-19: Unique Concerns and Considerations	Palermo, NE; Sadhu, AR; McDonnell, ME	JOURNAL OF CLINICAL ENDOCRINOLOGY & METABOLISM	2020	10.1210/clinem/dgaa360	WOS
Did government spending cuts to social care for older people lead to an increase in emergency hospital admissions? An ecological study, England 2005-2016	Seamer P, Brake S, Moore P, Mohammed MA, Wyatt S.	BMJ Open	2019	10.1136/bmjopen-2018-024577	PubMed
Did government spending cuts to social care for older people lead to an increase in emergency hospital admissions? An ecological study, England 2005-2016	Seamer, P., Brake, S., Moore, P., Mohammed, M.A., Wyatt, S.	BMJ Open	2019	10.1136/bmjopen-2018-024577	Scopus
Did government spending cuts to social care for older people lead to an increase in emergency hospital admissions? An ecological study, England 2005-2016	Seamer, P; Brake, S; Moore, P; Mohammed, MA; Wyatt, S	BMJ OPEN	2019	10.1136/bmjopen-2018-024577	WOS
Difference in frequency and outcome of geriatric emergency department utilization between urban and rural areas	Ko, MC; Lien, HY; Woung, LC; Chen, CY; Chen, YL; Chen, CC	JOURNAL OF THE CHINESE MEDICAL ASSOCIATION	2019	10.1097/JCMA.0000000000000053	WOS
Differences in realized access to healthcare among newly arrived refugees in Germany: results from a natural quasi-experiment	Wenner J, Bozorgmehr K, Duwendag S, Rolke K, Razum O.	BMC Public Health	2020	10.1186/s12889-020-08981-2	PubMed
Differences in realized access to healthcare among newly arrived refugees in Germany: Results from a natural quasi-experiment	Wenner, J., Bozorgmehr, K., Duwendag, S., Rolke, K., Razum, O.	BMC Public Health	2020	10.1186/s12889-020-08981-2	Scopus
Differences in realized access to healthcare among newly arrived refugees in Germany: results from a natural quasi-experiment	Wenner, J; Bozorgmehr, K; Duwendag, S; Rolke, K; Razum, O	BMC PUBLIC HEALTH	2020	10.1186/s12889-020-08981-2	WOS
Differences in the prevalence of hospitalizations and utilization of emergency outpatient services for ambulatory care sensitive conditions between asylum-seeking children and children of the general population: a cross-sectional medical records study (2015)	Lichtl C, Lutz T, Szecsenyi J, Bozorgmehr K.	BMC Health Serv Res	2017	10.1186/s12913-017-2672-7	PubMed
Differences in the prevalence of hospitalizations and utilization of emergency outpatient services for ambulatory care sensitive conditions between asylum-seeking children and children of the general population: A cross-sectional medical records study (2015)	Lichtl, C., Lutz, T., Szecsenyi, J., Bozorgmehr, K.	BMC Health Services Research	2017	10.1186/s12913-017-2672-7	Scopus
Differences in the prevalence of hospitalizations and utilization of emergency outpatient services for ambulatory care sensitive conditions between asylum-seeking children and children of the general population: a cross-sectional medical records study (2015)	Lichtl, C; Lutz, T; Szecsenyi, J; Bozorgmehr, K	BMC HEALTH SERVICES RESEARCH	2017	10.1186/s12913-017-2672-7	WOS
Disabling disease codes predict worse outcomes for acute medical admissions	Chotirmall, SH; Picardo, S; Lyons, J; D'Alton, M; O'Riordan, D; Silke, B	INTERNAL MEDICINE JOURNAL	2014	10.1111/imj.12440	WOS
Disease management in chronic kidney disease	Rastogi A, Linden A, Nissenson AR.	Adv Chronic Kidney Dis	2008	10.1053/j.ackd.2007.10.011	PubMed
Disease Management in Chronic Kidney Disease	Rastogi, A., Linden, A., Nissenson, A.R.	Advances in Chronic Kidney Disease	2008	10.1053/j.ackd.2007.10.011	Scopus
Disease management in chronic kidney disease	Rastogi, A; Linden, A; Nissenson, AR	ADVANCES IN CHRONIC KIDNEY DISEASE	2008	10.1053/j.ackd.2007.10.011	WOS
Disease severity at the time of initial cognitive assessment is related to prior health-care resource use burden	Desai U, Kirson NY, Lu Y, Bruemmer V, Andrews JS.	Alzheimers Dement (Amst)	2020	10.1002/dad2.12093	PubMed
Disease severity at the time of initial cognitive assessment is related to prior health-care resource use burden	Desai, U., Kirson, N.Y., Lu, Y., Bruemmer, V., Andrews, J.S.	Alzheimer's and Dementia: Diagnosis, Assessment and Disease Monitoring	2020	10.1002/dad2.12093	Scopus
Disease severity at the time of initial cognitive assessment is related to prior health-care resource use burden	Desai, U; Kirson, NY; Lu, Y; Bruemmer, V; Andrews, JS	ALZHEIMER'S & DEMENTIA: DIAGNOSIS, ASSESSMENT & DISEASE MONITORING	2020	10.1002/dad2.12093	WOS
Disparities in emergency department use between Italians and migrants residing in Rome, Italy: the Rome Dynamic Longitudinal Study from 2005 to 2015	Trappolini, E; Marino, C; Agabiti, N; Giudici, C; Davoli, M; Cacciani, L	BMC PUBLIC HEALTH	2020	10.1186/s12889-020-09280-6	WOS
Disparities in Health Literacy and Healthcare Utilization among Adolescents and Young Adults with Chronic or End-stage Kidney Disease	Levine R, Javalkar K, Nazareth M, Faldowski RA, de Ferris MD, Cohen S, Cuttance J, Hooper SR, Rak E.	J Pediatr Nurs	2018	10.1016/j.pedn.2017.10.008	PubMed
Disparities in Health Literacy and Healthcare Utilization among Adolescents and Young Adults with Chronic or End-stage Kidney Disease	Levine, R., Javalkar, K., Nazareth, M., Faldowski, R.A., de Ferris, M.D.-G., Cohen, S., Cuttance, J., Hooper, S.R., Rak, E.	Journal of Pediatric Nursing	2018	10.1016/j.pedn.2017.10.008	Scopus
Disparities in Health Literacy and Healthcare Utilization among Adolescents and Young Adults with Chronic or End-stage Kidney Disease	Levine, R; Javalkar, K; Nazareth, M; Faldowski, RA; de Ferris, MDG; Cohen, S; Cuttance, J; Hooper, SR; Rak, E	JOURNAL OF PEDIATRIC NURSING-NURSING CARE OF CHILDREN & FAMILIES	2018	10.1016/j.pedn.2017.10.008	WOS
Disparities in Potentially Avoidable Emergency Department (ED) Care ED Visits for Ambulatory Care Sensitive Conditions	Johnson, PJ; Ghildayal, N; Ward, AC; Westgard, BC; Boland, LL; Hokanson, JS	MEDICAL CARE	2012	10.1097/MLR.0b013e318270bad4	WOS
Disparities in potentially avoidable emergency department (ED) care: ED visits for ambulatory care sensitive conditions	Johnson PJ, Ghildayal N, Ward AC, Westgard BC, Boland LL, Hokanson JS.	Med Care	2012	10.1097/MLR.0b013e318270bad4	PubMed
Disparities in potentially avoidable emergency department (ED) care: ED visits for ambulatory care sensitive conditions	Johnson, P.J., Ghildayal, N., Ward, A.C., Westgard, B.C., Boland, L.L., Hokanson, J.S.	Medical Care	2012	10.1097/MLR.0b013e318270bad4	Scopus
Do care plans and annual reviews of physical health influence unplanned hospital utilisation for people with serious mental illness? Analysis of linked longitudinal primary and secondary healthcare records in England	Ride J, Kasteridis P, Gutacker N, Kronenberg C, Doran T, Mason A, Rice N, Gravelle H, Goddard M, Kendrick T, Siddiqi N, Gilbody S, Dare CR, Aylott L, Williams R, Jacobs R.	BMJ Open	2018	10.1136/bmjopen-2018-023135	PubMed
Do care plans and annual reviews of physical health influence unplanned hospital utilisation for people with serious mental illness? Analysis of linked longitudinal primary and secondary healthcare records in England	Ride, J., Kasteridis, P., Gutacker, N., Kronenberg, C., Doran, T., Mason, A., Rice, N., Gravelle, H., Goddard, M., Kendrick, T., Siddiqi, N., Gilbody, S., Dare, C.R.J., Aylott, L., Williams, R., Jacobs, R.	BMJ Open	2018	10.1136/bmjopen-2018-023135	Scopus
Do care plans and annual reviews of physical health influence unplanned hospital utilisation for people with serious mental illness? Analysis of linked longitudinal primary and secondary healthcare records in England	Ride, J; Kasteridis, P; Gutacker, N; Kronenberg, C; Doran, T; Mason, A; Rice, N; Gravelle, H; Goddard, M; Kendrick, T; Siddiqi, N; Gilbody, S; Dare, CRJ; Aylott, L; Williams, R; Jacobs, R	BMJ OPEN	2018	10.1136/bmjopen-2018-023135	WOS
Do general practice management and/or team care arrangements reduce avoidable hospitalisations in Central and Eastern Sydney, Australia?	Welberry H, Barr ML, Comino EJ, Harris-Roxas BF, Harris E, Dutton S, Jackson T, Donnelly D, Harris MF.	BMC Health Serv Res	2019	10.1186/s12913-019-4663-3	PubMed
Do general practice management and/or team care arrangements reduce avoidable hospitalisations in Central and Eastern Sydney, Australia?	Welberry, H., Barr, M.L., Comino, E.J., Harris-Roxas, B.F., Harris, E., Dutton, S., Jackson, T., Donnelly, D., Harris, M.F.	BMC Health Services Research	2019	10.1186/s12913-019-4663-3	Scopus
Do general practice management and/or team care arrangements reduce avoidable hospitalisations in Central and Eastern Sydney, Australia?	Welberry, H; Barr, ML; Comino, EJ; Harris-Roxas, BF; Harris, E; Dutton, S; Jackson, T; Donnelly, D; Harris, MF	BMC HEALTH SERVICES RESEARCH	2019	10.1186/s12913-019-4663-3	WOS
Do health checks for adults with intellectual disability reduce emergency hospital admissions? Evaluation of a natural experiment	Carey IM, Hosking FJ, Harris T, DeWilde S, Beighton C, Shah SM, Cook DG.	J Epidemiol Community Health	2017	10.1136/jech-2016-207557	PubMed
Do health checks for adults with intellectual disability reduce emergency hospital admissions? Evaluation of a natural experiment	Carey, I.M., Hosking, F.J., Harris, T., DeWilde, S., Beighton, C., Shah, S.M., Cook, D.G.	Journal of Epidemiology and Community Health	2016	10.1136/jech-2016-207557	Scopus
Do health checks for adults with intellectual disability reduce emergency hospital admissions? Evaluation of a natural experiment	Carey, IM; Hosking, FJ; Harris, T; DeWilde, S; Beighton, C; Shah, SM; Cook, DG	JOURNAL OF EPIDEMIOLOGY AND COMMUNITY HEALTH	2017	10.1136/jech-2016-207557	WOS
Do hospitalisations for ambulatory care sensitive conditions reflect low access to primary care? An observational cohort study of primary care usage prior to hospitalisation	Vuik SI, Fontana G, Mayer E, Darzi A.	BMJ Open	2017	10.1136/bmjopen-2016-015704	PubMed
Do hospitalisations for ambulatory care sensitive conditions reflect low access to primary care? An observational cohort study of primary care usage prior to hospitalisation	Vuik, S.I., Fontana, G., Mayer, E., Darzi, A.	BMJ Open	2017	10.1136/bmjopen-2016-015704	Scopus
Do hospitalisations for ambulatory care sensitive conditions reflect low access to primary care? An observational cohort study of primary care usage prior to hospitalisation	Vuik, SI; Fontana, G; Mayer, E; Darzit, A	BMJ OPEN	2017	10.1136/bmjopen-2016-015704	WOS
Do hospitals influence geographic variation in admission for preventable hospitalisation? A data linkage study in New South Wales, Australia	Falster MO, Leyland AH, Jorm LR.	BMJ Open	2019	10.1136/bmjopen-2018-027639	PubMed
Do hospitals influence geographic variation in admission for preventable hospitalisation? A data linkage study in New South Wales, Australia	Falster, M.O., Leyland, A.H., Jorm, L.R.	BMJ Open	2019	10.1136/bmjopen-2018-027639	Scopus
Do hospitals influence geographic variation in admission for preventable hospitalisation? A data linkage study in New South Wales, Australia	Falster, MO; Leyland, AH; Jorm, LR	BMJ OPEN	2019	10.1136/bmjopen-2018-027639	WOS
Do nurse navigators bring about fewer patient hospitalisations?	Gordon LG, Spooner AJ, Booth N, Downer TR, Hudson A, Yates P, Geary A, O'Donnell C, Chan R.	J Health Organ Manag	2019	10.1108/JHOM-02-2018-0063	PubMed
Do nurse navigators bring about fewer patient hospitalisations?	Gordon, L.G., Spooner, A.J., Booth, N., Downer, T.-R., Hudson, A., Yates, P., Geary, A., O’Donnell, C., Chan, R.	Journal of Health Organization and Management	2019	10.1108/JHOM-02-2018-0063	Scopus
Do nurse navigators bring about fewer patient hospitalisations?	Gordon, LG; Spooner, AJ; Booth, N; Downer, TR; Hudson, A; Yates, P; Geary, A; O'Donnell, C; Chan, R	JOURNAL OF HEALTH ORGANIZATION AND MANAGEMENT	2019	10.1108/JHOM-02-2018-0063	WOS
Do public health clinics reduce rehospitalizations? The urban diabetes study	Robbins, JM; Valdmanis, VG; Webb, DA	JOURNAL OF HEALTH CARE FOR THE POOR AND UNDERSERVED	2008	10.1353/hpu.0.0013	WOS
Does better disease management in primary care reduce hospital costs? Evidence from English primary care	Dusheiko, M., Gravelle, H., Martin, S., Rice, N., Smith, P.C.	Journal of Health Economics	2011	10.1016/j.jhealeco.2011.08.001	Scopus
Does better disease management in primary care reduce hospital costs? Evidence from English primary care	Dusheiko, M; Gravelle, H; Martin, S; Rice, N; Smith, PC	JOURNAL OF HEALTH ECONOMICS	2011	10.1016/j.jhealeco.2011.08.001	WOS
Does Greater Continuity of Veterans Administration Primary Care Reduce Emergency Department Visits and Hospitalization in Older Veterans?	Katz, DA; McCoy, KD; Vaughan-Sarrazin, MS	JOURNAL OF THE AMERICAN GERIATRICS SOCIETY	2015	10.1111/jgs.13841	WOS
Does higher quality of diabetes management in family practice reduce unplanned hospital admissions?	Dusheiko, M., Doran, T., Gravelle, H., Fullwood, C., Roland, M.	Health Services Research	2011	10.1111/j.1475-6773.2010.01184.x	Scopus
Does Higher Quality of Diabetes Management in Family Practice Reduce Unplanned Hospital Admissions?	Dusheiko, M; Doran, T; Gravelle, H; Fullwood, C; Roland, M	HEALTH SERVICES RESEARCH	2011	10.1111/j.1475-6773.2010.01184.x	WOS
Does practice analysis agree with the ambulatory care sensitive conditions' list of avoidable unplanned admissions?: a cross-sectional study in the East of England	Fleetcroft R, Hardcastle A, Steel N, Price GM, Purdy S, Lipp A, Myint PK, Howe A.	BMJ Open	2018	10.1136/bmjopen-2017-020756	PubMed
Does practice analysis agree with the ambulatory care sensitive conditions' list of avoidable unplanned admissions?: A cross-sectional study in the East of England	Fleetcroft, R., Hardcastle, A., Steel, N., Price, G.M., Purdy, S., Lipp, A., Myint, P.K., Howe, A.	BMJ Open	2018	10.1136/bmjopen-2017-020756	Scopus
Does practice analysis agree with the ambulatory care sensitive conditions' list of avoidable unplanned admissions?: a cross-sectional study in the East of England	Fleetcroft, R; Hardcastle, A; Steel, N; Price, GM; Purdy, S; Lipp, A; Myint, PK; Howe, A	BMJ OPEN	2018	10.1136/bmjopen-2017-020756	WOS
Does prevention-focused integration lead to the triple aim? An evaluation of two new care models in England	Stokes J, Shah V, Goldzahl L, Kristensen SR, Sutton M.	J Health Serv Res Policy	2021	10.1177/1355819620963500	PubMed
Does prevention-focused integration lead to the triple aim? An evaluation of two new care models in England	Stokes, J., Shah, V., Goldzahl, L., Kristensen, S.R., Sutton, M.	Journal of Health Services Research and Policy	2021	10.1177/1355819620963500	Scopus
Does prevention-focused integration lead to the triple aim? An evaluation of two new care models in England	Stokes, J; Shah, V; Goldzahl, L; Kristensen, SR; Sutton, M	JOURNAL OF HEALTH SERVICES RESEARCH & POLICY	2021	10.1177/1355819620963500	WOS
Does Spatial Access to Primary Care Affect Emergency Department Utilization for Nonemergent Conditions?	Fishman J, McLafferty S, Galanter W.	Health Serv Res	2018	10.1111/1475-6773.12617	PubMed
Does Spatial Access to Primary Care Affect Emergency Department Utilization for Nonemergent Conditions?	Fishman, J., McLafferty, S., Galanter, W.	Health Services Research	2018	10.1111/1475-6773.12617	Scopus
Does Spatial Access to Primary Care Affect Emergency Department Utilization for Nonemergent Conditions?	Fishman, J; McLafferty, S; Galanter, W	HEALTH SERVICES RESEARCH	2018	10.1111/1475-6773.12617	WOS
Does the quality and outcomes framework reduce psychiatric admissions in people with serious mental illness? A regression analysis	Gutacker, N; Mason, AR; Kendrick, T; Goddard, M; Gravelle, H; Gilbody, S; Aylott, L; Wainwright, J; Jacobs, R	BMJ OPEN	2015	10.1136/bmjopen-2014-007342	WOS
Does the Supplemental Nutrition Assistance Program Affect Hospital Utilization Among Older Adults? The Case of Maryland	Samuel, LJ; Szanton, SL; Cahill, R; Wolff, JL; Ong, P; Zielinskie, G; Betley, C	POPULATION HEALTH MANAGEMENT	2018	10.1089/pop.2017.0055	WOS
Drivers of potentially avoidable emergency admissions in Ireland: an ecological analysis	Lynch B, Fitzgerald AP, Corcoran P, Buckley C, Healy O, Browne J.	BMJ Qual Saf	2019	10.1136/bmjqs-2018-008002	PubMed
Drivers of potentially avoidable emergency admissions in Ireland: An ecological analysis	Lynch, B., Fitzgerald, A.P., Corcoran, P., Buckley, C., Healy, O., Browne, J.	BMJ Quality and Safety	2019	10.1136/bmjqs-2018-008002	Scopus
Drivers of potentially avoidable emergency admissions in Ireland: an ecological analysis	Lynch, B; Fitzgerald, AP; Corcoran, P; Buckley, C; Healy, O; Browne, J	BMJ QUALITY & SAFETY	2019	10.1136/bmjqs-2018-008002	WOS
Early and periodic screening, diagnosis, and treatment and infant health outcomes in Medicaid-insured infants in South Carolina	Pittard WB 3rd, Laditka JN, Laditka SB.	J Pediatr	2007	10.1016/j.jpeds.2007.04.006	PubMed
Early and Periodic Screening, Diagnosis, and Treatment and Infant Health Outcomes in Medicaid-Insured Infants in South Carolina	Pittard III, W.B., Laditka, J.N., Laditka, S.B.	Journal of Pediatrics	2007	10.1016/j.jpeds.2007.04.006	Scopus
Early and periodic screening, diagnosis, and treatment and infant health outcomes in medicaid-insured infants in south Carolina	Pittard, WB; Laditka, JN; Laditka, SB	JOURNAL OF PEDIATRICS	2007	10.1016/j.jpeds.2007.04.006	WOS
Early changes in VA medical home components and utilization	Yoon J, Liu CF, Lo J, Schectman G, Stark R, Rubenstein LV, Yano EM.	Am J Manag Care	2015		PubMed
Early changes in VA medical home components and utilization	Yoon, J., Liu, C.-F., Lo, J., Schectman, G., Stark, R., Rubenstein, L.V., Yano, E.M.	American Journal of Managed Care	2015		Scopus
Early Changes in VA Medical Home Components and Utilization	Yoon, J; Liu, CF; Lo, J; Schectman, G; Stark, R; Rubenstein, LV; Yano, EM	AMERICAN JOURNAL OF MANAGED CARE	2015		WOS
Early Impact of the State Innovation Models Initiative on Diagnosed Diabetes Prevalence among Adults and Hospitalizations among Diagnosed Adults	Fulton, B.D., Hong, N., Rodriguez, H.P.	Medical Care	2019	10.1097/MLR.0000000000001161	Scopus
Early performance in medicaid accountable care organizations a comparison of Oregon and Colorado	McConnell, K.J., Renfro, S., Chan, B.K.S., Meath, T.H.A., Mendelson, A., Cohen, D., Waxmonsky, J., McCarty, D., Wallace, N., Lindrooth, R.C.	JAMA Internal Medicine	2017	10.1001/jamainternmed.2016.9098	Scopus
Early Performance in Medicaid Accountable Care Organizations A Comparison of Oregon and Colorado	McConnell, KJ; Renfro, S; Chan, BKS; Meath, THA; Mendelson, A; Cohen, D; Waxmonsky, J; McCarty, D; Wallace, N; Lindrooth, RC	JAMA INTERNAL MEDICINE	2017	10.1001/jamainternmed.2016.9098	WOS
Early Performance in Medicaid Accountable Care Organizations: A Comparison of Oregon and Colorado	McConnell KJ, Renfro S, Chan BK, Meath TH, Mendelson A, Cohen D, Waxmonsky J, McCarty D, Wallace N, Lindrooth RC.	JAMA Intern Med	2017	10.1001/jamainternmed.2016.9098	PubMed
Economic and financial crisis based on Troika's intervention and potentially avoidable hospitalizations: an ecological study in Portugal	Loureiro da Silva C, Rocha JV, Santana R.	BMC Health Serv Res	2021	10.1186/s12913-021-06475-4	PubMed
Economic and financial crisis based on Troika's intervention and potentially avoidable hospitalizations: an ecological study in Portugal	da Silva, CL; Rocha, JV; Santana, R	BMC HEALTH SERVICES RESEARCH	2021	10.1186/s12913-021-06475-4	WOS
Economic and financial crisis based on Troika’s intervention and potentially avoidable hospitalizations: an ecological study in Portugal	Loureiro da Silva, C., Rocha, J.V., Santana, R.	BMC Health Services Research	2021	10.1186/s12913-021-06475-4	Scopus
Economic burden of dehydration among hospitalized elderly patients	Xiao H, Barber J, Campbell ES.	Am J Health Syst Pharm	2004	10.1093/ajhp/61.23.2534	PubMed
Economic burden of dehydration among hospitalized elderly patients	Xiao, H., Barber, J., Campbell, E.S.	American Journal of Health-System Pharmacy	2004	10.1093/ajhp/61.23.2534	Scopus
Economic burden of dehydration among hospitalized elderly patients	Xiao, H; Barber, J; Campbell, ES	AMERICAN JOURNAL OF HEALTH-SYSTEM PHARMACY	2004	10.1093/ajhp/61.23.2534	WOS
Economic Impact of Oritavancin for the Treatment of Acute Bacterial Skin and Skin Structure Infections in the Emergency Department or Observation Setting: Cost Savings Associated with Avoidable Hospitalizations	Lodise TP, Fan W, Sulham KA.	Clin Ther	2016	10.1016/j.clinthera.2015.11.014	PubMed
Economic Impact of Oritavancin for the Treatment of Acute Bacterial Skin and Skin Structure Infections in the Emergency Department or Observation Setting: Cost Savings Associated with Avoidable Hospitalizations	Lodise, T.P., Fan, W., Sulham, K.A.	Clinical Therapeutics	2016	10.1016/j.clinthera.2015.11.014	Scopus
Economic Impact of Oritavancin for the Treatment of Acute Bacterial Skin and Skin Structure Infections in the Emergency Department or Observation Setting: Cost Savings Associated with Avoidable Hospitalizations	Lodise, TP; Fan, WH; Sulham, KA	CLINICAL THERAPEUTICS	2016	10.1016/j.clinthera.2015.11.014	WOS
ED visits by older adults for ambulatory care-sensitive and supply-sensitive conditions	Carter, M.W., Datti, B., Winters, J.M.	American Journal of Emergency Medicine	2006	10.1016/j.ajem.2005.12.012	Scopus
ED visits by older adults for ambulatory care-sensitive and supply-sensitive conditions	Carter, MW; Datti, B; Winters, JM	AMERICAN JOURNAL OF EMERGENCY MEDICINE	2006	10.1016/j.ajem.2005.12.012	WOS
Effect of a copayment on use of the emergency department in a health maintenance organization	Selby JV, Fireman BH, Swain BE.	N Engl J Med	1996	10.1056/NEJM199603073341006	PubMed
Effect of a copayment on use of the emergency department in a health maintenance organization	Selby, J.V., Fireman, B.H., Swain, B.E.	New England Journal of Medicine	1996	10.1056/NEJM199603073341006	Scopus
Effect of a copayment on use of the emergency department in a health maintenance organization	Selby, JV; Fireman, BH; Swain, BE	NEW ENGLAND JOURNAL OF MEDICINE	1996	10.1056/NEJM199603073341006	WOS
Effect of a Multidisciplinary Approach for the Management of Patients With Atrial Fibrillation in the Emergency Department on Hospital Admission Rate and Length of Stay	Ptaszek LM, White B, Lubitz SA, Carnicelli AP, Heist EK, Ellinor PT, Machado M, Wasfy JH, Ruskin JN, Armstrong K, Brown DF, Biddinger PD, Mansour M.	Am J Cardiol	2016	10.1016/j.amjcard.2016.04.014	PubMed
Effect of a multidisciplinary approach for the management of patients with atrial fibrillation in the emergency department on hospital admission rate and length of stay	Ptaszek, L.M., White, B., Lubitz, S.A., Carnicelli, A.P., Heist, E.K., Ellinor, P.T., MacHado, M., Wasfy, J.H., Ruskin, J.N., Armstrong, K., Brown, D.F., Biddinger, P.D., Mansour, M.	American Journal of Cardiology	2016	10.1016/j.amjcard.2016.04.014	Scopus
Effect of a Multidisciplinary Approach for the Management of Patients With Atrial Fibrillation in the Emergency Department on Hospital Admission Rate and Length of Stay	Ptaszek, LM; White, B; Lubitz, SA; Carnicelli, AP; Heist, EK; Ellinor, PT; Machado, M; Wasfy, JH; Ruskin, JN; Armstrong, K; Brown, DF; Biddinger, PD; Mansour, M	AMERICAN JOURNAL OF CARDIOLOGY	2016	10.1016/j.amjcard.2016.04.014	WOS
Effect of a national primary care pay for performance scheme on emergency hospital admissions for ambulatory care sensitive conditions: controlled longitudinal study	Harrison MJ, Dusheiko M, Sutton M, Gravelle H, Doran T, Roland M.	BMJ	2014	10.1136/bmj.g6423	PubMed
Effect of a national primary care pay for performance scheme on emergency hospital admissions for ambulatory care sensitive conditions: Controlled longitudinal study	Harrison, M.J., Dusheiko, M., Sutton, M., Gravelle, H., Doran, T., Roland, M.	BMJ (Online)	2014	10.1136/bmj.g6423	Scopus
Effect of a national primary care pay for performance scheme on emergency hospital admissions for ambulatory care sensitive conditions: controlled longitudinal study	Harrison, MJ; Dusheiko, M; Sutton, M; Gravelle, H; Doran, T; Roland, M	BMJ-BRITISH MEDICAL JOURNAL	2014	10.1136/bmj.g6423	WOS
Effect of Continuity of Care on Emergency Department Visits in Elderly Patients with Asthma in Taiwan	Kao, YH; Wu, SC	JOURNAL OF THE AMERICAN BOARD OF FAMILY MEDICINE	2017	10.3122/jabfm.2017.03.160285	WOS
Effect of reducing cost sharing for outpatient care on children's inpatient services in Japan	Kato H, Goto R.	Health Econ Rev	2017	10.1186/s13561-017-0165-3	PubMed
Effect of reducing cost sharing for outpatient care on children's inpatient services in Japan	Kato, H; Goto, R	HEALTH ECONOMICS REVIEW	2017	10.1186/s13561-017-0165-3	WOS
Effect of reducing cost sharing for outpatient care on children’s inpatient services in Japan	Kato, H., Goto, R.	Health Economics Review	2017	10.1186/s13561-017-0165-3	Scopus
Effect of single follow-up home visit on readmission in a group of frail elderly patients - a Danish randomized clinical trial	Lembeck MA, Thygesen LC, Sørensen BD, Rasmussen LL, Holm EA.	BMC Health Serv Res	2019	10.1186/s12913-019-4528-9	PubMed
Effect of single follow-up home visit on readmission in a group of frail elderly patients - A Danish randomized clinical trial	Lembeck, M.A., Thygesen, L.C., Sørensen, B.D., Rasmussen, L.L., Holm, E.A.	BMC Health Services Research	2019	10.1186/s12913-019-4528-9	Scopus
Effect of single follow-up home visit on readmission in a group of frail elderly patients - a Danish randomized clinical trial	Lembeck, MA; Thygesen, LC; Sorensen, BD; Rasmussen, LL; Holm, EA	BMC HEALTH SERVICES RESEARCH	2019	10.1186/s12913-019-4528-9	WOS
Effect of the 2011 Revisions to the Field Triage Guidelines on Under- and Over-Triage Rates for Pediatric Trauma Patients	Lerner EB, Cushman JT, Drendel AL, Badawy M, Shah MN, Guse CE, Cooper A.	Prehosp Emerg Care	2017	10.1080/10903127.2017.1300717	PubMed
Effect of the 2016 Kumamoto earthquakes on preventable hospital admissions: a retrospective cohort study in Japan	Sasabuchi Y, Matsui H, Kotani K, Lefor AK, Yasunaga H.	BMJ Open	2018	10.1136/bmjopen-2017-021294	PubMed
Effect of the 2016 Kumamoto earthquakes on preventable hospital admissions: A retrospective cohort study in Japan	Sasabuchi, Y., Matsui, H., Kotani, K., Lefor, A.K., Yasunaga, H.	BMJ Open	2018	10.1136/bmjopen-2017-021294	Scopus
Effect of the 2016 Kumamoto earthquakes on preventable hospital admissions: a retrospective cohort study in Japan	Sasabuchi, Y; Matsui, H; Kotani, K; Lefor, AK; Yasunaga, H	BMJ OPEN	2018	10.1136/bmjopen-2017-021294	WOS
Effect on secondary care of providing enhanced support to residential and nursing home residents: a subgroup analysis of a retrospective matched cohort study	Lloyd T, Conti S, Santos F, Steventon A.	BMJ Qual Saf	2019	10.1136/bmjqs-2018-009130	PubMed
Effect on secondary care of providing enhanced support to residential and nursing home residents: A subgroup analysis of a retrospective matched cohort study	Lloyd, T., Conti, S., Santos, F., Steventon, A.	BMJ Quality and Safety	2019	10.1136/bmjqs-2018-009130	Scopus
Effect on secondary care of providing enhanced support to residential and nursing home residents: a subgroup analysis of a retrospective matched cohort study	Lloyd, T; Conti, S; Santos, F; Steventon, A	BMJ QUALITY & SAFETY	2019	10.1136/bmjqs-2018-009130	WOS
Effectiveness of a Wellness Program for Individuals With Spina Bifida and Spinal Cord Injury Within an Integrated Delivery System	Dicianno BE, Lovelace J, Peele P, Fassinger C, Houck P, Bursic A, Boninger ML.	Arch Phys Med Rehabil	2016	10.1016/j.apmr.2016.05.014	PubMed
Effectiveness of a Wellness Program for Individuals With Spina Bifida and Spinal Cord Injury Within an Integrated Delivery System	Dicianno, B.E., Lovelace, J., Peele, P., Fassinger, C., Houck, P., Bursic, A., Boninger, M.L.	Archives of Physical Medicine and Rehabilitation	2016	10.1016/j.apmr.2016.05.014	Scopus
Effectiveness of a Wellness Program for Individuals With Spina Bifida and Spinal Cord Injury Within an Integrated Delivery System	Dicianno, BE; Lovelace, J; Peele, P; Fassinger, C; Houck, P; Bursic, A; Boninger, ML	ARCHIVES OF PHYSICAL MEDICINE AND REHABILITATION	2016	10.1016/j.apmr.2016.05.014	WOS
Effectiveness of multidisciplinary team case management: difference-in-differences analysis	Stokes J, Kristensen SR, Checkland K, Bower P.	BMJ Open	2016	10.1136/bmjopen-2015-010468	PubMed
Effectiveness of multidisciplinary team case management: difference-in-differences analysis	Stokes, J; Kristensen, SR; Checkland, K; Bower, P	BMJ OPEN	2016	10.1136/bmjopen-2015-010468	WOS
Effects of a Behavioral Health and Chronic Illness Care Intervention on Patient Outcomes in Primary Care Practices in the Dakotas	Zurovac J, Peterson GG, Stewart KA, Kranker K, Wells K, Gilman B, Blue L, Day T, Hoag S, Moreno L.	J Health Care Poor Underserved	2019	10.1353/hpu.2019.0051	PubMed
Effects of a behavioral health and chronic illness care intervention on patient outcomes in primary care practices in the dakotas	Zurovac, J., Peterson, G.G., Stewart, K.A., Kranker, K., Wells, K., Gilman, B., Blue, L., Day, T., Hoag, S., Moreno, L.	Journal of Health Care for the Poor and Underserved	2019	10.1353/hpu.2019.0051	Scopus
Effects of a Behavioral Health and Chronic Illness Care Intervention on Patient Outcomes in Primary Care Practices in the Dakotas	Zurovac, J; Peterson, GG; Stewart, KA; Kranker, K; Wells, K; Gilman, B; Blue, L; Day, T; Hoag, S; Moreno, L	JOURNAL OF HEALTH CARE FOR THE POOR AND UNDERSERVED	2019	10.1353/hpu.2019.0051	WOS
Effects of ambulatory emergency care on organisational and patient outcomes	Baker J.	Nurs Manag (Harrow)	2018	10.7748/nm.2018.e1728	PubMed
Effects of ambulatory emergency care on organisational and patient outcomes	Baker, J.	Nursing Management	2018	10.7748/nm.2018.e1728	Scopus
Effects of an Intervention to Reduce Hospitalizations From Nursing Homes A Randomized Implementation Trial of the INTERACT Program	Kane, RL; Huckfeldt, P; Tappen, R; Engstrom, G; Rojido, C; Newman, D; Yang, ZY; Ouslander, JG	JAMA INTERNAL MEDICINE	2017	10.1001/jamainternmed.2017.2657	WOS
Effects of an Intervention to Reduce Hospitalizations From Nursing Homes: A Randomized Implementation Trial of the INTERACT Program	Kane RL, Huckfeldt P, Tappen R, Engstrom G, Rojido C, Newman D, Yang Z, Ouslander JG.	JAMA Intern Med	2017	10.1001/jamainternmed.2017.2657	PubMed
Effects of an intervention to reduce hospitalizations from nursing homes: A randomized implementation trial of the INTERACT program	Kane, R.L., Huckfeldt, P., Tappen, R., Engstrom, G., Rojido, C., Newman, D., Yang, Z., Ouslander, J.G.	JAMA Internal Medicine	2017	10.1001/jamainternmed.2017.2657	Scopus
Effects of long-term high continuity of care on avoidable hospitalizations of chronic obstructive pulmonary disease patients	Lin, IP; Wu, SC	HEALTH POLICY	2017	10.1016/j.healthpol.2017.06.010	WOS
Effects of mode and time of EMS transport on the rate and distribution of dead on arrival among trauma population transported to ACSCOT-verified trauma centers in the United States	Elkbuli A, Boserup B, Sen-Crowe B, Autrey C, McKenney M.	Am J Emerg Med	2021	10.1016/j.ajem.2021.08.035	PubMed
Effects of mode and time of EMS transport on the rate and distribution of dead on arrival among trauma population transported to ACSCOT-verified trauma centers in the United States	Elkbuli, A., Boserup, B., Sen-Crowe, B., Autrey, C., McKenney, M.	American Journal of Emergency Medicine	2021	10.1016/j.ajem.2021.08.035	Scopus
Effects of mode and time of EMS transport on the rate and distribution of dead on arrival among trauma population transported to ACSCOT-verified trauma centers in the United States	Elkbuli, A; Boserup, B; Sen-Crowe, B; Autrey, C; McKenney, M	AMERICAN JOURNAL OF EMERGENCY MEDICINE	2021	10.1016/j.ajem.2021.08.035	WOS
Effects of self-care behaviors on medical utilization of the elderly with chronic diseases - A representative sample study	Chen IH, Chi MJ.	Arch Gerontol Geriatr	2015	10.1016/j.archger.2015.01.014	PubMed
Effects of self-care behaviors on medical utilization of the elderly with chronic diseases - A representative sample study	Chen, I.-H., Chi, M.-J.	Archives of Gerontology and Geriatrics	2015	10.1016/j.archger.2015.01.014	Scopus
Effects of self-care behaviors on medical utilization of the elderly with chronic diseases - A representative sample study	Chen, IH; Chi, MJ	ARCHIVES OF GERONTOLOGY AND GERIATRICS	2015	10.1016/j.archger.2015.01.014	WOS
Efficacy of interventions led by staff with geriatrics expertise in reducing hospitalisation in nursing home residents: A systematic review	Santosaputri, E; Laver, K; To, T	AUSTRALASIAN JOURNAL ON AGEING	2019	10.1111/ajag.12593	WOS
EMANet: A regional network for health services research in emergency and acute medicine	Schmiedhofer, M; Inhoff, T; Krobisch, V; Schenk, L; Rose, M; Holzinger, F; Keil, T; Muller-Werdan, U; Gunster, C; Mockel, M	ZEITSCHRIFT FUR EVIDENZ FORTBILDUNG UND QUALITAET IM GESUNDHEITSWESEN	2018	10.1016/j.zefq.2018.07.009	WOS
EMANet: A regional network for health services research in emergency and acute medicine [EMANET - Regionales Netzwerk für Versorgungsforschung in der Notfall- und Akutmedizin]	Schmiedhofer, M., Inhoff, T., Krobisch, V., Schenk, L., Rose, M., Holzinger, F., Keil, T., Müller-Werdan, U., Günster, C., Möckel, M.	Zeitschrift fur Evidenz, Fortbildung und Qualitat im Gesundheitswesen	2018	10.1016/j.zefq.2018.07.009	Scopus
Emergency admissions for coronary heart disease: a cross-sectional study of general practice, population and hospital factors in England	Purdy S, Griffin T, Salisbury C, Sharp D.	Public Health	2011	10.1016/j.puhe.2010.07.006	PubMed
Emergency admissions for coronary heart disease: A cross-sectional study of general practice, population and hospital factors in England	Purdy, S., Griffin, T., Salisbury, C., Sharp, D.	Public Health	2011	10.1016/j.puhe.2010.07.006	Scopus
Emergency admissions for coronary heart disease: A cross-sectional study of general practice, population and hospital factors in England	Purdy, S; Griffin, T; Salisbury, C; Sharp, D	PUBLIC HEALTH	2011	10.1016/j.puhe.2010.07.006	WOS
Emergency admissions of ambulatory care sensitive conditions at a Japanese local hospital: An observational study	Shinotsuka M, Matsumura S, Okada T.	J Gen Fam Med	2020	10.1002/jgf2.352	PubMed
Emergency admissions of ambulatory care sensitive conditions at a Japanese local hospital: An observational study	Shinotsuka, M., Matsumura, S., Okada, T.	Journal of General and Family Medicine	2020	10.1002/jgf2.352	Scopus
Emergency admissions of ambulatory care sensitive conditions at a Japanese local hospital: An observational study	Shinotsuka, M; Matsumura, S; Okada, T	JOURNAL OF GENERAL AND FAMILY MEDICINE	2020	10.1002/jgf2.352	WOS
Emergency ambulance service involvement with residential care homes in the support of older people with dementia: an observational study	Amador S, Goodman C, King D, Machen I, Elmore N, Mathie E, Iliffe S.	BMC Geriatr	2014	10.1186/1471-2318-14-95	PubMed
Emergency ambulance service involvement with residential care homes in the support of older people with dementia: An observational study	Amador, S., Goodman, C., King, D., Machen, I., Elmore, N., Mathie, E., Iliffe, S.	BMC Geriatrics	2014	10.1186/1471-2318-14-95	Scopus
Emergency ambulance service involvement with residential care homes in the support of older people with dementia: an observational study	Amador, S; Goodman, C; King, D; Machen, I; Elmore, N; Mathie, E; Iliffe, S	BMC GERIATRICS	2014	10.1186/1471-2318-14-95	WOS
Emergency Care of Children with Ambulatory Care Sensitive Conditions in the United States	Jaeger MW, Ambadwar PB, King AJ, Onukwube JI, Robbins JM.	J Emerg Med	2015	10.1016/j.jemermed.2015.03.001	PubMed
Emergency Care of Children with Ambulatory Care Sensitive Conditions in the United States	Jaeger, M.W., Ambadwar, P.B., King, A.J., Onukwube, J.I., Robbins, J.M.	Journal of Emergency Medicine	2015	10.1016/j.jemermed.2015.03.001	Scopus
EMERGENCY CARE OF CHILDREN WITH AMBULATORY CARE SENSITIVE CONDITIONS IN THE UNITED STATES	Jaeger, MW; Ambadwar, PB; King, AJ; Onukwube, JI; Robbins, JM	JOURNAL OF EMERGENCY MEDICINE	2015	10.1016/j.jemermed.2015.03.001	WOS
Emergency department and inpatient hospital use by Medicare beneficiaries in patient-centered medical homes	Pines JM, Keyes V, van Hasselt M, McCall N.	Ann Emerg Med	2015	10.1016/j.annemergmed.2015.01.002	PubMed
Emergency department and inpatient hospital use by medicare beneficiaries in patient-centered medical homes	Pines, J.M., Keyes, V., Van Hasselt, M., McCall, N.	Annals of Emergency Medicine	2015	10.1016/j.annemergmed.2015.01.002	Scopus
Emergency Department and Inpatient Hospital Use by Medicare Beneficiaries in Patient-Centered Medical Homes	Pines, JM; Keyes, V; van Hasselt, M; McCall, N	ANNALS OF EMERGENCY MEDICINE	2015	10.1016/j.annemergmed.2015.01.002	WOS
Emergency department and inpatient hospitalizations for young people with fragile X syndrome	McDermott S, Hardin JW, Royer JA, Mann JR, Tong X, Ozturk OD, Ouyang L.	Am J Intellect Dev Disabil	2015	10.1352/1944-7558-120.3.230	PubMed
Emergency department and inpatient hospitalizations for young people with fragile X syndrome	McDermott, S., Hardin, J.W., Royer, J.A., Mann, J.R., Tong, X., Ozturk, O.D., Ouyang, L.	American journal on intellectual and developmental disabilities	2015	10.1352/1944-7558-120.3.230	Scopus
Emergency Department and Inpatient Hospitalizations for Young People With Fragile X Syndrome	McDermott, S; Hardin, JW; Royer, JA; Mann, JR; Tong, X; Ozturk, OD; Ouyang, LJ	AJIDD-AMERICAN JOURNAL ON INTELLECTUAL AND DEVELOPMENTAL DISABILITIES	2015	10.1352/1944-7558-120.3.230	WOS
Emergency department and inpatient utilization among U.S. older adults with multiple chronic conditions: a post-reform update	Ahn S, Hussein M, Mahmood A, Smith ML.	BMC Health Serv Res	2020	10.1186/s12913-020-4902-7	PubMed
Emergency department and inpatient utilization among U.S. older adults with multiple chronic conditions: A post-reform update	Ahn, S., Hussein, M., Mahmood, A., Smith, M.L.	BMC Health Services Research	2020	10.1186/s12913-020-4902-7	Scopus
Emergency department and inpatient utilization among US older adults with multiple chronic conditions: a post-reform update	Ahn, S; Hussein, M; Mahmood, A; Smith, ML	BMC HEALTH SERVICES RESEARCH	2020	10.1186/s12913-020-4902-7	WOS
Emergency department interventions for persons with dementia presenting with ambulatory care-sensitive conditions: a scoping review protocol	Temple BA, Krishnan P, O'Connell B, Grant LG, Demczuk L.	JBI Database System Rev Implement Rep	2017	10.11124/JBISRIR-2016-003263	PubMed
Emergency department interventions for persons with dementia presenting with ambulatory care-sensitive conditions: A scoping review protocol	Temple, B.A., Krishnan, P., O’Connell, B., Grant, L.G., Demczuk, L.	JBI Database of Systematic Reviews and Implementation Reports	2017	10.11124/JBISRIR-2016-003263	Scopus
Emergency department presentations of patients from CALDB receiving chemotherapy in day oncology settings	Craike, M.J., Livingston, P.M., Considine, J.	Australasian Emergency Nursing Journal	2010	10.1016/j.aenj.2010.08.088	Scopus
Emergency department usage by adults with cerebral palsy: A retrospective cohort study	Gill J, Morgan P, Enticott J.	Emerg Med Australas	2021	10.1111/1742-6723.13832	PubMed
Emergency department usage by adults with cerebral palsy: A retrospective cohort study	Gill, J., Morgan, P., Enticott, J.	EMA - Emergency Medicine Australasia	2021	10.1111/1742-6723.13832	Scopus
Emergency department usage by adults with cerebral palsy: A retrospective cohort study	Gill, J; Morgan, P; Enticott, J	EMERGENCY MEDICINE AUSTRALASIA		10.1111/1742-6723.13832	WOS
Emergency Department Use Among Older Adults With Dementia	LaMantia, MA; Stump, TE; Messina, FC; Miller, DK; Callahan, CM	ALZHEIMER DISEASE & ASSOCIATED DISORDERS	2016	10.1097/WAD.0000000000000118	WOS
Emergency Department Use among Patients with CKD: A Population-Based Analysis	Ronksley PE, Tonelli M, Manns BJ, Weaver RG, Thomas CM, MacRae JM, Ravani P, Quinn RR, James MT, Lewanczuk R, Hemmelgarn BR.	Clin J Am Soc Nephrol	2017	10.2215/CJN.06280616	PubMed
Emergency department use among patients with CKD: A Population-Based Analysis	Ronksley, P.E., Tonelli, M., Manns, B.J., Weaver, R.G., Thomas, C.M., Macrae, J.M., Ravani, P., Quinn, R.R., James, M.T., Lewanczuk, R., Hemmelgarn, B.R.	Clinical Journal of the American Society of Nephrology	2017	10.2215/CJN.06280616	Scopus
Emergency Department Use among Patients with CKD: A Population-Based Analysis	Ronksley, PE; Tonelli, M; Manns, BJ; Weaver, RG; Thomas, CM; MacRae, JM; Ravani, P; Quinn, RR; James, MT; Lewanczuk, R; Hemmelgarn, BR	CLINICAL JOURNAL OF THE AMERICAN SOCIETY OF NEPHROLOGY	2017	10.2215/CJN.06280616	WOS
Emergency Department use by nursing home residents: Effect of severity of cognitive impairment	Stephens, C.E., Newcomer, R., Blegen, M., Miller, B., Harrington, C.	Gerontologist	2012	10.1093/geront/gnr109	Scopus
Emergency Department Use by Nursing Home Residents: Effect of Severity of Cognitive Impairment	Stephens, CE; Newcomer, R; Blegen, M; Miller, B; Harrington, C	GERONTOLOGIST	2012	10.1093/geront/gnr109	WOS
Emergency department use by people with HIV in Ontario: a population-based cohort study	Ng R, Kendall CE, Burchell AN, Bayoumi AM, Loutfy MR, Raboud J, Glazier RH, Rourke S, Antoniou T.	CMAJ Open	2016	10.9778/cmajo.20150087	PubMed
Emergency department use for acute rhinosinusitis: Insurance dependent for children and adults	Bergmark RW, Ishman SL, Phillips KM, Cunningham MJ, Sedaghat AR.	Laryngoscope	2018	10.1002/lary.26671	PubMed
Emergency department use for acute rhinosinusitis: Insurance dependent for children and adults	Bergmark, R.W., Ishman, S.L., Phillips, K.M., Cunningham, M.J., Sedaghat, A.R.	Laryngoscope	2018	10.1002/lary.26671	Scopus
Emergency Department Use for Acute Rhinosinusitis: Insurance Dependent for Children and Adults	Bergmark, RW; Ishman, SL; Phillips, KM; Cunningham, MJ; Sedaghat, AR	LARYNGOSCOPE	2018	10.1002/lary.26671	WOS
Emergency department use in people who experience imprisonment in Ontario, Canada	Tuinema J, Orkin AM, Cheng SY, Fung K, Kouyoumdjian FG.	CJEM	2020	10.1017/cem.2019.401	PubMed
Emergency department use in people who experience imprisonment in Ontario, Canada	Tuinema, J., Orkin, A.M., Cheng, S.Y., Fung, K., Kouyoumdjian, F.G.	Canadian Journal of Emergency Medicine	2020	10.1017/cem.2019.401	Scopus
Emergency department use in people who experience imprisonment in Ontario, Canada	Tuinema, J; Orkin, AM; Cheng, SY; Fung, K; Kouyoumdjian, FG	CANADIAN JOURNAL OF EMERGENCY MEDICINE	2020	10.1017/cem.2019.401	WOS
Emergency department use: a reflection of poor primary care access?	Weisz D, Gusmano MK, Wong G, Trombley J.	Am J Manag Care	2015		PubMed
Emergency department use: a reflection of poor primary care access?	Weisz, D., Gusmano, M.K., Wong, G., Trombley, J.	The American journal of managed care	2015		Scopus
Emergency Department Use: A Reflection of Poor Primary Care Access?	Weisz, D; Gusmano, MK; Wong, G; Trombley, J	AMERICAN JOURNAL OF MANAGED CARE	2015		WOS
Emergency department utilization among people with disabilities in Korea	Kim AM, Lee JY, Kim J.	Disabil Health J	2018	10.1016/j.dhjo.2018.03.001	PubMed
Emergency department utilization among people with disabilities in Korea	Kim, A.M., Lee, J.Y., Kim, J.	Disability and Health Journal	2018	10.1016/j.dhjo.2018.03.001	Scopus
Emergency department utilization among people with disabilities in Korea	Kim, AM; Lee, JY; Kim, J	DISABILITY AND HEALTH JOURNAL	2018	10.1016/j.dhjo.2018.03.001	WOS
Emergency department utilization among recently released prisoners: a retrospective cohort study	Frank JW, Andrews CM, Green TC, Samuels AM, Trinh TT, Friedmann PD.	BMC Emerg Med	2013	10.1186/1471-227X-13-16	PubMed
Emergency department utilization among recently released prisoners: A retrospective cohort study	Frank, J.W., Andrews, C.M., Green, T.C., Samuels, A.M., Trinh, T.T., Friedmann, P.D.	BMC Emergency Medicine	2013	10.1186/1471-227X-13-16	Scopus
Emergency department utilization and capacity	Delia D, Cantor JC.	Synth Proj Res Synth Rep	2009		PubMed
Emergency department utilization by noninstitutionalized elders	Shah, MN; Rathouz, PJ; Chin, MH	ACADEMIC EMERGENCY MEDICINE	2001	10.1111/j.1553-2712.2001.tb01303.x	WOS
Emergency Department Utilization of Adolescents and Young Adults with Autism Spectrum Disorder	Iannuzzi D, Hall M, Oreskovic NM, Aryee E, Broder-Fingert S, Perrin JM, Kuhlthau KA.	J Autism Dev Disord	2021	10.1007/s10803-021-04969-y	PubMed
Emergency Department Utilization of Adolescents and Young Adults with Autism Spectrum Disorder	Iannuzzi, D., Hall, M., Oreskovic, N.M., Aryee, E., Broder-Fingert, S., Perrin, J.M., Kuhlthau, K.A.	Journal of Autism and Developmental Disorders	2021	10.1007/s10803-021-04969-y	Scopus
Emergency Department Utilization of Adolescents and Young Adults with Autism Spectrum Disorder	Iannuzzi, D; Hall, M; Oreskovic, NM; Aryee, E; Broder-Fingert, S; Perrin, JM; Kuhlthau, KA	JOURNAL OF AUTISM AND DEVELOPMENTAL DISORDERS		10.1007/s10803-021-04969-y	WOS
Emergency department visits among people with cancer: Frequency, symptoms, and characteristics	Gallaway, MS; Idaikkadar, N; Tai, E; Momin, B; Rohan, EA; Townsend, J; Puckett, M; Stewart, SL	JOURNAL OF THE AMERICAN COLLEGE OF EMERGENCY PHYSICIANS OPEN	2021	10.1002/emp2.12438	WOS
Emergency Department Visits and Disease Burden Attributable to Ambulatory Care Sensitive Conditions in Elderly Adults	Hsieh VC, Hsieh ML, Chiang JH, Chien A, Hsieh MS.	Sci Rep	2019	10.1038/s41598-019-40206-4	PubMed
Emergency Department Visits and Disease Burden Attributable to Ambulatory Care Sensitive Conditions in Elderly Adults	Hsieh, V.C.-R., Hsieh, M.-L., Chiang, J.-H., Chien, A., Hsieh, M.-S.	Scientific Reports	2019	10.1038/s41598-019-40206-4	Scopus
Emergency Department Visits and Disease Burden Attributable to Ambulatory Care Sensitive Conditions in Elderly Adults	Hsieh, VCR; Hsieh, ML; Chiang, JH; Chien, A; Hsieh, MS	SCIENTIFIC REPORTS	2019	10.1038/s41598-019-40206-4	WOS
Emergency department visits and hospitalizations by tube-fed nursing home residents with varying degrees of cognitive impairment: a national study	Stephens, CE; Sackett, N; Govindarajan, P; Lee, SJ	BMC GERIATRICS	2014	10.1186/1471-2318-14-35	WOS
Emergency department visits and primary care among adults with chronic conditions	McCusker J, Roberge D, Lévesque JF, Ciampi A, Vadeboncoeur A, Larouche D, Sanche S.	Med Care	2010	10.1097/MLR.0b013e3181eaf86d	PubMed
Emergency department visits and primary care among adults with chronic conditions	McCusker, J., Roberge, D., Lévesque, J.-F., Ciampi, A., Vadeboncoeur, A., Larouche, D., Sanche, S.	Medical Care	2010	10.1097/MLR.0b013e3181eaf86d	Scopus
Emergency Department Visits and Primary Care Among Adults With Chronic Conditions	McCusker, J; Roberge, D; Levesque, JF; Ciampi, A; Vadeboncoeur, A; Larouche, D; Sanche, S	MEDICAL CARE	2010	10.1097/MLR.0b013e3181eaf86d	WOS
Emergency department visits and resulting hospitalizations by elderly nursing home residents, 2001-2008	Hsiao CJ, Hing E.	Res Aging	2014	10.1177/0164027512473488	PubMed
Emergency Department Visits and Resulting Hospitalizations by Elderly Nursing Home Residents, 2001-2008	Hsiao, C.-J., Hing, E.	Research on Aging	2014	10.1177/0164027512473488	Scopus
Emergency Department Visits and Resulting Hospitalizations by Elderly Nursing Home Residents, 2001-2008	Hsiao, CJ; Hing, E	RESEARCH ON AGING	2014	10.1177/0164027512473488	WOS
Emergency department visits for ambulatory care sensitive conditions	Lima ACMG, Nichiata LYI, Bonfim D.	Rev Esc Enferm USP	2019	10.1590/S1980-220X2017042103414	PubMed
Emergency department visits for ambulatory care sensitive conditions	de Lima, A.C.M.G., Nichiata, L.Y.I., Bonfim, D.	Revista da Escola de Enfermagem	2019	10.1590/S1980-220X2017042103414	Scopus
Emergency department visits for ambulatory care sensitive conditions	de Lima, ACMG; Nichiata, LYI; Bonfim, D	REVISTA DA ESCOLA DE ENFERMAGEM DA USP	2019	10.1590/S1980-220X2017042103414	WOS
Emergency department visits for ambulatory care sensitive conditions - Insights into preventable hospitalizations	Oster, A; Bindman, AB	MEDICAL CARE	2003	10.1097/00005650-200302000-00002	WOS
Emergency department visits for ambulatory care sensitive conditions insights into preventable hospitalizations	Oster, A., Bindman, A.B.	Medical Care	2003	10.1097/00005650-200302000-00002	Scopus
Emergency department visits for ambulatory care sensitive conditions: insights into preventable hospitalizations	Oster A, Bindman AB.	Med Care	2003	10.1097/01.MLR.0000045021.70297.9F	PubMed
Emergency department visits for ambulatory care sensitive conditions: Insights into preventable hospitalizations.	Oster, A; Bindman, AB	JOURNAL OF GENERAL INTERNAL MEDICINE	2002		WOS
Emergency Department Visits for Ambulatory Care Sensitive Conditions: The Role of County-Level Primary Care Provider Density and Payer Status	Terp, S; Mehta, R; Romley, J; Goldman, D; Arora, S; Seabury, S; Menchine, M	ANNALS OF EMERGENCY MEDICINE	2013		WOS
Emergency medical services transport decisions in posttraumatic circulatory arrest: are national practices congruent?	Brywczynski J, McKinney J, Pepe PE, Eckstein M, Myers JB, Fowler RL, Slovis CM; Writing Group for U.S. Metropolitan Municipalities EMS Medical Directors Consortium.	J Trauma	2010	10.1097/TA.0b013e3181eda9aa	PubMed
Emergency medical services transport decisions in posttraumatic circulatory arrest: Are national practices congruent?	Brywczynski, J., McKinney, J., Pepe, P.E., Eckstein, M., Myers, J.B., Fowler, R.L., Slovis, C.M.	Journal of Trauma - Injury, Infection and Critical Care	2010	10.1097/TA.0b013e3181eda9aa	Scopus
Emergency Medical Services Transport Decisions in Posttraumatic Circulatory Arrest: Are National Practices Congruent?	Brywczynski, J; McKinney, J; Pepe, PE; Eckstein, M; Myers, JB; Fowler, RL; Slovis, CM	JOURNAL OF TRAUMA-INJURY INFECTION AND CRITICAL CARE	2010	10.1097/TA.0b013e3181eda9aa	WOS
Emergency Room Visits by Uninsured Child and Adult Residents in Ontario, Canada: What Diagnoses, Severity and Visit Disposition Reveal About the Impact of Being Uninsured	Hynie M, Ardern CI, Robertson A.	J Immigr Minor Health	2016	10.1007/s10903-016-0351-0	PubMed
Emergency Room Visits by Uninsured Child and Adult Residents in Ontario, Canada: What Diagnoses, Severity and Visit Disposition Reveal About the Impact of Being Uninsured	Hynie, M., Ardern, C.I., Robertson, A.	Journal of Immigrant and Minority Health	2016	10.1007/s10903-016-0351-0	Scopus
Emergency Room Visits by Uninsured Child and Adult Residents in Ontario, Canada: What Diagnoses, Severity and Visit Disposition Reveal About the Impact of Being Uninsured	Hynie, M; Ardern, CI; Robertson, A	JOURNAL OF IMMIGRANT AND MINORITY HEALTH	2016	10.1007/s10903-016-0351-0	WOS
EMS Immobilization Techniques	Feller R, Furin M, Alloush A, Reynolds C.	StatPearls	2021		PubMed
Enhanced primary care provided by a nurse practitioner candidate to aged care facility residents: A mixed methods study	Craswell, A., Wallis, M., Coates, K., Marsden, E., Taylor, A., Broadbent, M., Nguyen, K.-H., Johnston-Devin, C., Glenwright, A., Crilly, J.	Collegian	2020	10.1016/j.colegn.2019.08.009	Scopus
Enriched Medical Home Intervention Using Community Health Worker Home Visitation and ED Use	Anugu M, Braksmajer A, Huang J, Yang J, Ladowski KL, Pati S.	Pediatrics	2017	10.1542/peds.2016-1849	PubMed
Enriched medical home intervention using community health worker home visitation and ED use	Anugu, M., Braksmajer, A., Huang, J., Yang, J., Ladowski, K.L., Pati, S.	Pediatrics	2017	10.1542/peds.2016-1849	Scopus
Enriched Medical Home Intervention Using Community Health Worker Home Visitation and ED Use	Anugu, M; Braksmajer, A; Huang, JY; Yang, J; Ladowski, KL; Pati, S	PEDIATRICS	2017	10.1542/peds.2016-1849	WOS
Enrolment in primary care networks: impact on outcomes and processes of care for patients with diabetes	Manns BJ, Tonelli M, Zhang J, Campbell DJ, Sargious P, Ayyalasomayajula B, Clement F, Johnson JA, Laupacis A, Lewanczuk R, McBrien K, Hemmelgarn BR.	CMAJ	2012	10.1503/cmaj.110755	PubMed
Enrolment in primary care networks: Impact on outcomes and processes of care for patients with diabetes	Manns, B.J., Tonelli, M., Zhang, J., Campbell, D.J.T., Sargious, P., Ayyalasomayajula, B., Clement, F., Johnson, J.A., Laupacis, A., Lewanczuk, R., McBrien, K., Hemmelgarn, B.R.	CMAJ	2012	10.1503/cmaj.110755	Scopus
Enrolment in primary care networks: impact on outcomes and processes of care for patients with diabetes	Manns, BJ; Tonelli, M; Zhang, JG; Campbell, DJT; Sargious, P; Ayyalasomayajula, B; Clement, F; Johnson, JA; Laupacis, A; Lewanczuk, R; McBrien, K; Hemmelgarn, BR	CANADIAN MEDICAL ASSOCIATION JOURNAL	2012	10.1503/cmaj.110755	WOS
Epidemiologic study in hospitalized patients with head injuries	Aras Y, Sabanci PA, Unal TC, Aydoseli A, Izgi N.	Eur J Trauma Emerg Surg	2017	10.1007/s00068-016-0668-3	PubMed
Epidemiologic study in hospitalized patients with head injuries	Aras, Y., Sabanci, P.A., Unal, T.C., Aydoseli, A., Izgi, N.	European Journal of Trauma and Emergency Surgery	2017	10.1007/s00068-016-0668-3	Scopus
Epidemiologic study in hospitalized patients with head injuries	Aras, Y; Sabanci, PA; Unal, TC; Aydoseli, A; Izgi, N	EUROPEAN JOURNAL OF TRAUMA AND EMERGENCY SURGERY	2017	10.1007/s00068-016-0668-3	WOS
Epidemiology of Pediatric Musculoskeletal Injuries and Their Pattern in a Tertiary Care Center of North India	Singh O, Gupta S, Din Darokhan MAU, Ahmad S, Charak SS, Sen A.	Indian J Orthop	2018	10.4103/ortho.IJOrtho_516_17	PubMed
Epidemiology of pediatric musculoskeletal injuries and their pattern in a tertiary care center of North India	Singh, O., Gupta, S., Darokhan, M.D., Ahmad, S., Charak, S.S., Sen, A.	Indian Journal of Orthopaedics	2018	10.4103/ortho.IJOrtho_516_17	Scopus
Epidemiology of Pediatric Musculoskeletal Injuries and Their Pattern in a Tertiary Care Center of North India	Singh, O; Gupta, S; Darokhan, MAUD; Ahmad, S; Charak, SS; Sen, A	INDIAN JOURNAL OF ORTHOPAEDICS	2018	10.4103/ortho.IJOrtho_516_17	WOS
Erratum regarding missing Declaration of Competing Interest statements in previously published articles (Preventive Medicine Reports (2018) 10 (136–143), (S2211335518300378), (10.1016/j.pmedr.2018.02.018))	[No author name available]	Preventive Medicine Reports	2020	10.1016/j.pmedr.2020.101282	Scopus
Erratum: Remdesivir: A review of its discovery and development leading to human clinical trials for treatment of COVID-19 (ACS Central Science (2020) 6:5 (672-683) DOI: 10.1021/acscentsci.0c00489)	Eastman, R.T., Roth, J.S., Brimacombe, K.R., Simeonov, A., Shen, M., Patnaik, S., Hall, M.D.	ACS Central Science	2020	10.1021/acscentsci.0c00747	Scopus
Estimating air quality change-associated health benefits by reducing PM10 in Bogotá [Estimación de los beneficios económicos en salud asociados a la reducción de PM10 en Bogotá]	Ortiz-Durán, E.Y., Rojas-Roa, N.Y.	Revista de Salud Publica	2013		Scopus
Estimating cost implications of potentially avoidable hospitalizations among oncology care model patients with prostate cancer	Smith, W.H., Parikh, A.B., Li, L., Sanderson, M., Liu, M., Mazumdar, M., Isola, L.M., Dharmarajan, K.V.	Journal of Cancer Policy	2020	10.1016/j.jcpo.2020.100218	Scopus
Ethnic disparities in preventable hospitalisation in England: an analysis of 916 375 emergency admissions	Petersen J, Kandt J, Longley P.	J Epidemiol Community Health	2022	10.1136/jech-2020-216005	PubMed
Ethnic disparities in preventable hospitalisation in England: An analysis of 916 375 emergency admissions	Petersen, J., Kandt, J., Longley, P.	Journal of Epidemiology and Community Health	2021	10.1136/jech-2020-216005	Scopus
Evaluating health care of the immigrant population in Italy through indicators of a national monitoring system	Di Napoli, A; Rossi, A; Battisti, L; Cacciani, L; Caranci, N; Cernigliaro, A; De Giorgi, M; Fanolla, A; Fateh-Moghadam, P; Franchini, D; Lazzeretti, M; Melani, C; Mininni, M; Mondo, L; Recine, M; Rosaia, EM; Rusciani, R; Scondotto, S; Silvestri, C; Trappolini, E; Petrelli, A	EPIDEMIOLOGIA & PREVENZIONE	2020	10.19191/EP20.5-6.S1.P085.077	WOS
Evaluating health care of the immigrant population in Italy through indicators of a national monitoring system [Valutazione dell’assistenza sanitaria della popolazione immigrata in Italia attraverso alcuni indicatori di un sistema nazionale di monitoraggio]	Di Napoli, A., Rossi, A., Battisti, L., Cacciani, L., Caranci, N., Cernigliaro, A., De Giorgi, M., Fanolla, A., Fateh-Moghadam, P., Franchini, D., Lazzeretti, M., Melani, C., Mininni, M., Mondo, L., Recine, M., Rosaia, E.M., Rusciani, R., Scondotto, S., Silvestri, C., Trappolini, E., Petrelli, A.	Epidemiologia e Prevenzione	2020	10.19191/EP20.5-6.S1.P085.077	Scopus
Evaluation and Comparison of Different Prehospital Triage Scores of Trauma Patients on In-Hospital Mortality	Cassignol, A., Markarian, T., Cotte, J., Marmin, J., Nguyen, C., Cardinale, M., Pauly, V., Kerbaul, F., Meaudre, E., Bobbia, X.	Prehospital Emergency Care	2019	10.1080/10903127.2018.1549627	Scopus
Evaluation of a community-based inner-city disease management program for postmyocardial infarction patients: a randomized controlled trial	Young, W; Rewa, G; Goodman, SG; Jaglal, SB; Cash, L; Lefkowitz, C; Coyte, PC	CANADIAN MEDICAL ASSOCIATION JOURNAL	2003		WOS
Evaluation of a novel decision guide “go to the hospital or stay here?” for nursing home residents and families a randomized trial	Tappen, R.M., Worch, S.M., Newman, D.O., Hain, D.	Research in Gerontological Nursing	2020	10.3928/19404921-20201002-01	Scopus
Evaluation of appropriate management of chronic obstructive pulmonary disease in Korea: Based on Health Insurance Review and Assessment Service (HIRA) Claims	Chung, S.M., Lee, S.Y.	Tuberculosis and Respiratory Diseases	2017	10.4046/trd.2017.80.3.241	Scopus
Evaluation of Care Processes and Health Care Utilization in Newly Implemented Medical Homes in Italy: A Population-Based Cross-sectional Study	Alcusky M, Singer D, Keith SW, Hegarty SE, Lombardi M, Saccenti E, Maio V.	Am J Med Qual	2020	10.1177/1062860619860590	PubMed
Evaluation of Care Processes and Health Care Utilization in Newly Implemented Medical Homes in Italy: A Population-Based Cross-sectional Study	Alcusky, M., Singer, D., Keith, S.W., Hegarty, S.E., Lombardi, M., Saccenti, E., Maio, V.	American Journal of Medical Quality	2020	10.1177/1062860619860590	Scopus
Evaluation of Care Processes and Health Care Utilization in Newly Implemented Medical Homes in Italy: A Population-Based Cross-sectional Study	Alcusky, M; Singer, D; Keith, SW; Hegarty, SE; Lombardi, M; Saccenti, E; Maio, V	AMERICAN JOURNAL OF MEDICAL QUALITY	2020	10.1177/1062860619860590	WOS
Evaluation of comprehensive annual care plans by pharmacists in Alberta for patients with complex conditions	Necyk C, Johnson JA, Minhas-Sandhu J, Tsuyuki RT, Eurich DT.	J Am Pharm Assoc (2003)	2020	10.1016/j.japh.2020.08.025	PubMed
Evaluation of comprehensive annual care plans by pharmacists in Alberta for patients with complex conditions	Necyk, C., Johnson, J.A., Minhas-Sandhu, J., Tsuyuki, R.T., Eurich, D.T.	Journal of the American Pharmacists Association	2020	10.1016/j.japh.2020.08.025	Scopus
Evaluation of comprehensive annual care plans by pharmacists in Alberta for patients with complex conditions	Necyk, C; Johnson, JA; Minhas-Sandhu, J; Tsuyuki, RT; Eurich, DT	JOURNAL OF THE AMERICAN PHARMACISTS ASSOCIATION	2020	10.1016/j.japh.2020.08.025	WOS
Evaluation of Hospital Admission Status for Emergency Department Patients Seen for Chronic Obstructive Pulmonary Disease Exacerbation: A Retrospective Observational Study	Smith HL, Ellis CS.	Ochsner J	2021	10.31486/toj.19.0121	PubMed
Evaluation of hospital admission status for emergency department patients seen for chronic obstructive pulmonary disease exacerbation: A retrospective observational study	Smith, H.L., Ellis, C.S.	Ochsner Journal	2021	10.31486/toj.19.0121	Scopus
Evaluation of Hospital Admission Status for Emergency Department Patients Seen for Chronic Obstructive Pulmonary Disease Exacerbation: A Retrospective Observational Study	Smith, HL; Ellis, CS	OCHSNER JOURNAL	2021	10.31486/toj.19.0121	WOS
Evaluation of Hospitalizations Preventable with Idealized Outpatient Care and Continuity of Care	Li, SX; del Carmen, MG; Thompson, RW; Cafiero-Fonseca, ET; Rockett, H; Ferris, TG; Terry, DF; Warner, AS; Yu, A; Wasfy, JH	JOURNAL FOR HEALTHCARE QUALITY	2021	10.1097/JHQ.0000000000000259	WOS
Evidence Brief: Effectiveness of Intensive Primary Care Programs	Peterson K, Helfand M, Humphrey L, Christensen V, Carson S.	VA Evidence Synthesis Program Evidence Briefs	2011		PubMed
Exertional heat stroke in athletes	Kjertakov, M., Epstein, Y.	Macedonian Journal of Medical Sciences	2013	10.3889/MJMS.1857-5773.2013.0308	Scopus
Exertional heat stroke in navy and marine personnel: a hot topic	Goforth CW, Kazman JB.	Crit Care Nurse	2015	10.4037/ccn2015257	PubMed
Exertional heat stroke in Navy and Marine personnel: A hot topic	Goforth, C.W., Kazman, J.B.	Critical Care Nurse	2015	10.4037/ccn2015257	Scopus
Exertional Heat Stroke in Navy and Marine Personnel: A Hot Topic	Goforth, CW; Kazman, JB	CRITICAL CARE NURSE	2015	10.4037/ccn2015257	WOS
Exertional heatstroke: a preventable condition	Epstein Y, Sohar E, Shapiro Y.	Isr J Med Sci	1995		PubMed
Expanding the universe of universal coverage: the population health argument for increasing coverage for immigrants	Nandi A, Loue S, Galea S.	J Immigr Minor Health	2009	10.1007/s10903-009-9267-2	PubMed
Expanding the universe of universal coverage: The population health argument for increasing coverage for immigrants	Nandi, A., Loue, S., Galea, S.	Journal of Immigrant and Minority Health	2009	10.1007/s10903-009-9267-2	Scopus
Expanding the Universe of Universal Coverage: The Population Health Argument for Increasing Coverage for Immigrants	Nandi, A; Loue, S; Galea, S	JOURNAL OF IMMIGRANT AND MINORITY HEALTH	2009	10.1007/s10903-009-9267-2	WOS
Explaining variation in emergency admissions: a mixed-methods study of emergency and urgent care systems	O’Cathain A, Knowles E, Turner J, Maheswaran R, Goodacre S, Hirst E, Nicholl J.	Explaining variation in emergency admissions: a mixed-methods study of emergency and urgent care systems	2014	10.3310/hsdr02480	PubMed
Exploring factors impacting early childhood health among Aboriginal and Torres Strait Islander families and communities: protocol for a population-based cohort study using data linkage (the 'Defying the Odds' study)	McNamara B, Gubhaju L, Jorm L, Preen D, Jones J, Joshy G, Shepherd C, McAullay D, Eades S; Defying the Odds project investigators..	BMJ Open	2018	10.1136/bmjopen-2017-021236	PubMed
Exploring factors impacting early childhood health among Aboriginal and Torres Strait Islander families and communities: Protocol for a population-based cohort study using data linkage (the 'Defying the Odds' study)	McNamara, B., Gubhaju, L., Jorm, L., Preen, D., Jones, J., Joshy, G., Shepherd, C., McAullay, D., Eades, S.	BMJ Open	2018	10.1136/bmjopen-2017-021236	Scopus
Exploring factors impacting early childhood health among Aboriginal and Torres Strait Islander families and communities: protocol for a population-based cohort study using data linkage (the 'Defying the Odds' study)	McNamara, B; Gubhaju, L; Jorm, L; Preen, D; Jones, J; Joshy, G; Shepherd, C; McAullay, D; Eades, S	BMJ OPEN	2018	10.1136/bmjopen-2017-021236	WOS
Exploring hospital-based health information technology functions for patients with Alzheimer's Disease and related Dementias	Wang N, Albaroudi A, Benjenk I, Chen J.	Prev Med Rep	2021	10.1016/j.pmedr.2021.101459	PubMed
Exploring hospital-based health information technology functions for patients with Alzheimer's Disease and related Dementias	Wang, N., Albaroudi, A., Benjenk, I., Chen, J.	Preventive Medicine Reports	2021	10.1016/j.pmedr.2021.101459	Scopus
Exploring hospital-based health information technology functions for patients with Alzheimer's Disease and related Dementias	Wang, NAY; Albaroudi, A; Benjenk, I; Chen, J	PREVENTIVE MEDICINE REPORTS	2021	10.1016/j.pmedr.2021.101459	WOS
Exposure to natural cold and heat: Hypothermia and hyperthermia medicare claims, United States, 2004-2005	Noe, R.S., Jin, J.O., Wolkin, A.F.	American Journal of Public Health	2012	10.2105/AJPH.2011.300557	Scopus
Factors associated with ambulatory care sensitive emergency department visits for South Carolina Medicaid members with intellectual disability	McDermott S, Royer J, Mann JR, Armour BS.	J Intellect Disabil Res	2018	10.1111/jir.12429	PubMed
Factors associated with ambulatory care sensitive emergency department visits for South Carolina Medicaid members with intellectual disability	McDermott, S., Royer, J., Mann, J.R., Armour, B.S.	Journal of Intellectual Disability Research	2018	10.1111/jir.12429	Scopus
Factors associated with ambulatory care sensitive emergency department visits for South Carolina Medicaid members with intellectual disability	McDermott, S; Royer, J; Mann, JR; Armour, BS	JOURNAL OF INTELLECTUAL DISABILITY RESEARCH	2018	10.1111/jir.12429	WOS
Factors Associated With Emergency Department Visits by People With Dementia Near the End of Life: A Systematic Review	Williamson, LE; Evans, CJ; Cripps, RL; Leniz, J; Yorganci, E; Sleeman, KE	JOURNAL OF THE AMERICAN MEDICAL DIRECTORS ASSOCIATION	2021	10.1016/j.jamda.2021.06.012	WOS
Factors associated with low-acuity hospital admissions in a public safety-net setting: a cross-sectional study	Eslami, NP; Nguyen, J; Navarro, L; Douglas, M; Bann, M	BMC HEALTH SERVICES RESEARCH	2020	10.1186/s12913-020-05456-3	WOS
Factors Associated with Potentially Inappropriate Transfer to the Emergency Department among Nursing Home Residents	Rolland, Y; Mathieu, C; Tavassoli, N; Berard, E; Mazieres, CLD; Hermabessiere, S; Houles, M; Perrin, A; Krams, T; Qassemi, S; Cambon, A; Magre, E; Cantet, C; Charpentier, S; Lauque, D; Azema, O; Chicoulaa, B; Oustric, S; McCambridge, C; Gombault-Datzenko, E; Molinier, L; Costa, N; Barreto, PD	JOURNAL OF THE AMERICAN MEDICAL DIRECTORS ASSOCIATION	2021	10.1016/j.jamda.2021.04.002	WOS
Factors Influencing Hospital Admission of Non-critically Ill Patients Presenting to the Emergency Department: a Cross-sectional Study	Hunter, AEL; Spatz, ES; Bernstein, SL; Rosenthal, MS	JOURNAL OF GENERAL INTERNAL MEDICINE	2016	10.1007/s11606-015-3438-8	WOS
Factors influencing hospital conveyance following ambulance attendance for people with diabetes: A retrospective observational study	van Woerden, H., Bucholc, M., Clubbs Coldron, B., Coates, V., Heaton, J., McCann, M., Perrin, N., Waterson, R., Watson, A., MacRury, S.	Diabetic Medicine	2021	10.1111/dme.14384	Scopus
Factors predisposing nursing home resident to inappropriate transfer to emergency department. The FINE study protocol	Perrin, A; Tavassoli, N; Mathieu, C; Hermabessiere, S; Houles, M; McCambridge, C; Magre, E; Fernandez, S; Caquelard, A; Charpentier, S; Lauque, D; Azema, O; Bismuth, S; Chicoulaa, B; Oustric, S; Costa, N; Molinier, L; Vellas, B; Berard, E; Rolland, Y	CONTEMPORARY CLINICAL TRIALS COMMUNICATIONS	2017	10.1016/j.conctc.2017.07.005	WOS
Falls and fall prevention in the elderly	Carpenter, C.	Geriatric Emergency Medicine: Principles and Practice	2014	10.1017/CBO9781139250986.033	Scopus
Family caregivers' reports of hospitalizations and emergency department visits in community-dwelling individuals with dementia	Benner M, Steiner V, Pierce LL.	Dementia (London)	2018	10.1177/1471301216653537	PubMed
Family caregivers' reports of hospitalizations and emergency department visits in community-dwelling individuals with dementia	Benner, M; Steiner, V; Pierce, LL	DEMENTIA-INTERNATIONAL JOURNAL OF SOCIAL RESEARCH AND PRACTICE	2018	10.1177/1471301216653537	WOS
Family caregivers’ reports of hospitalizations and emergency department visits in community-dwelling individuals with dementia	Benner, M., Steiner, V., Pierce, L.L.	Dementia	2018	10.1177/1471301216653537	Scopus
Family Health Program and ambulatory care-sensitive conditions in Southern Brazil	Nedel FB, Facchini LA, Martín-Mateo M, Vieira LA, Thumé E.	Rev Saude Publica	2008	10.1590/s0034-89102008000600010	PubMed
Family Health Program and ambulatory care-sensitive conditions in Southern Brazil	Nedel, FB; Facchini, LA; Martin-Mateo, M; Vieira, LAS; Thume, E	REVISTA DE SAUDE PUBLICA	2008		WOS
Family Health Program and ambulatory care-sensitive conditions in Southern Brazil [Programa Saúde da Família e condições sensíveis à atençtião primária, Bagé (RS)]	Nedel, F.B., Facchini, L.A., Martín-Mateo, M., Vieira, L.A.S., Thumé, E.	Revista de Saude Publica	2008	10.1590/s0034-89102008000600010	Scopus
Feasibility of Using Mobile Health to Promote Self-Management in Spina Bifida	Dicianno, BE; Fairman, AD; Mccue, M; Parmanto, B; Yih, E; Mccoy, A; Pramana, G; Yu, DX; McClelland, J; Collins, DM; Brienza, DM	AMERICAN JOURNAL OF PHYSICAL MEDICINE & REHABILITATION	2016	10.1097/PHM.0000000000000400	WOS
Federally Qualified Health Center Access and Emergency Department Use Among Children	Nath, JB; Costigan, S; Lin, F; Vittinghoff, E; Hsia, RY	PEDIATRICS	2016	10.1542/peds.2016-0479	WOS
Federally Qualified Health Center Use Among Dual Eligibles: Rates Of Hospitalizations And Emergency Department Visits	Wright B, Potter AJ, Trivedi A.	Health Aff (Millwood)	2015	10.1377/hlthaff.2014.0823	PubMed
Federally qualified health center use among dual eligibles: Rates of hospitalizations and emergency department visits	Wright, B., Potter, A.J., Trivedi, A.	Health Affairs	2015	10.1377/hlthaff.2014.0823	Scopus
Federally Qualified Health Center Use Among Dual Eligibles: Rates Of Hospitalizations And Emergency Department Visits	Wright, B; Potter, AJ; Trivedi, A	HEALTH AFFAIRS	2015	10.1377/hlthaff.2014.0823	WOS
Female health care during Operation Desert Storm: the Eighth Evacuation Hospital experience	Markenson G, Raez E, Colavita M.	Mil Med	1992		PubMed
FEMALE HEALTH-CARE DURING OPERATION DESERT STORM - THE 8TH EVACUATION HOSPITAL EXPERIENCE	MARKENSON, G; RAEZ, E; COLAVITA, M	MILITARY MEDICINE	1992	10.1093/milmed/157.11.610	WOS
First Nations’ hospital readmission ending in death: a potential sentinel indicator of inequity?	Lavoie, J., Phillips-Beck, W., Kinew, K.A., Kyoon-Achan, G., Katz, A.	International Journal of Circumpolar Health	2021	10.1080/22423982.2020.1859824	Scopus
Forecasting of ionospheric TEC for different latitudes, seasons and solar activity conditions based on OKSM	Mukesh, R., Karthikeyan, V., Soma, P., Sindhu, P.	Astrophysics and Space Science	2020	10.1007/s10509-020-3730-x	Scopus
Forecasting of ionospheric TEC for different latitudes, seasons and solar activity conditions based on OKSM	Mukesh, R; Karthikeyan, V; Soma, P; Sindhu, P	ASTROPHYSICS AND SPACE SCIENCE	2020	10.1007/s10509-020-3730-x	WOS
Fragmentation in acute and emergency care: Causes, consequences, and solutions	Pines, J.M., Zocchi, M.S., Dietrich, C.N., Benoit, M.	Value and Quality Innovations in Acute and Emergency Care	2017	10.1017/9781316779965.004	Scopus
Frequency and costs of hospital transfers for ambulatory care-sensitive conditions	Axon RN, Gebregziabher M, Craig J, Zhang J, Mauldin P, Moran WP.	Am J Manag Care	2015		PubMed
Frequency and costs of hospital transfers for ambulatory care-sensitive conditions	Neal Axon, R., Gebregziabher, M., Craig, J., Zhang, J., Mauldin, P., Moran, W.P.	American Journal of Managed Care	2015		Scopus
Frequency and Costs of Hospital Transfers for Ambulatory Care-Sensitive Conditions	Axon, RN; Gebregziabher, M; Craig, J; Zhang, JW; Mauldin, P; Moran, WP	AMERICAN JOURNAL OF MANAGED CARE	2015		WOS
Frequency and pattern of emergency department visits by long-term care residents - A population-based study	Gruneir, A., Bell, C.M., Bronskill, S.E., Schull, M., Anderson, G.M., Rochon, P.A.	Journal of the American Geriatrics Society	2010	10.1111/j.1532-5415.2010.02736.x	Scopus
Frequency and pattern of emergency department visits by long-term care residents--a population-based study	Gruneir A, Bell CM, Bronskill SE, Schull M, Anderson GM, Rochon PA.	J Am Geriatr Soc	2010	10.1111/j.1532-5415.2010.02736.x	PubMed
Frequency and Pattern of Emergency Department Visits by Long-Term Care Residents-A Population-Based Study	Gruneir, A; Bell, CM; Bronskill, SE; Schull, M; Anderson, GM; Rochon, PA	JOURNAL OF THE AMERICAN GERIATRICS SOCIETY	2010	10.1111/j.1532-5415.2010.02736.x	WOS
Frequent emergency department use by older adults with ambulatory care sensitive conditions: A population-based cohort study	Dufour I, Chiu Y, Courteau J, Chouinard MC, Dubuc N, Hudon C.	Geriatr Gerontol Int	2020	10.1111/ggi.13875	PubMed
Frequent emergency department use by older adults with ambulatory care sensitive conditions: A population-based cohort study	Dufour, I., Chiu, Y., Courteau, J., Chouinard, M.-C., Dubuc, N., Hudon, C.	Geriatrics and Gerontology International	2020	10.1111/ggi.13875	Scopus
Frequent emergency department use by older adults with ambulatory care sensitive conditions: A population-based cohort study	Dufour, I; Chiu, Y; Courteau, J; Chouinard, MC; Dubuc, N; Hudon, C	GERIATRICS & GERONTOLOGY INTERNATIONAL	2020	10.1111/ggi.13875	WOS
Frequent hospital admission of older people with chronic disease: a cross-sectional survey with telephone follow-up and data linkage	Longman, JM; Rolfe, MI; Passey, MD; Heathcote, KE; Ewald, DP; Dunn, T; Barclay, LM; Morgan, GG	BMC HEALTH SERVICES RESEARCH	2012	10.1186/1472-6963-12-373	WOS
Frequent use of hospital inpatient services during a nine year period: a retrospective cohort study	Springer, AM; Condon, JR; Li, SQ; Guthridge, SL	BMC HEALTH SERVICES RESEARCH	2017	10.1186/s12913-017-2285-1	WOS
General practitioner consultation after a visit to the emergency department: an observational study	Rotival J, Yordanov Y, Thiebaud PC, Pelletier-Fleury N, Jacquet E, Debuc E, Pateron D, Naouri D.	Fam Pract	2019	10.1093/fampra/cmy054	PubMed
General practitioner consultation after a visit to the emergency department: An observational study	Rotival, J., Yordanov, Y., Thiebaud, P.-C., Pelletier-Fleury, N., Jacquet, E., Debuc, E., Pateron, D., Naouri, D.	Family Practice	2018	10.1093/fampra/cmy054	Scopus
General practitioner consultation after a visit to the emergency department: an observational study	Rotival, J; Yordanov, Y; Thiebaud, PC; Pelletier-Fleury, N; Jacquet, E; Debuc, E; Pateron, D; Naouri, D	FAMILY PRACTICE	2019	10.1093/fampra/cmy054	WOS
Geographic Variance in Maryland's Potentially Preventable Emergency Visits: Comparison of Explanatory Models	Rowe GC.	West J Nurs Res	2020	10.1177/0193945919867938	PubMed
Geographic Variance in Maryland's Potentially Preventable Emergency Visits: Comparison of Explanatory Models	Rowe, GC	WESTERN JOURNAL OF NURSING RESEARCH	2020	10.1177/0193945919867938	WOS
Geographic Variance in Maryland’s Potentially Preventable Emergency Visits: Comparison of Explanatory Models	Rowe, G.C.	Western Journal of Nursing Research	2020	10.1177/0193945919867938	Scopus
Geographic variation in potentially avoidable hospitalizations in France	Mercier, G., Georgescu, V., Bousquet, J.	Health Affairs	2015	10.1377/hlthaff.2014.1065	Scopus
Geographical variation of emergency hospital admissions for ambulatory care sensitive conditions in older adults in Ireland 2012-2016	Walsh ME, Cronin S, Boland F, Ebell MH, Fahey T, Wallace E.	BMJ Open	2021	10.1136/bmjopen-2020-042779	PubMed
Geographical variation of emergency hospital admissions for ambulatory care sensitive conditions in older adults in Ireland 2012-2016	Walsh, M.E., Cronin, S., Boland, F., Ebell, M.H., Fahey, T., Wallace, E.	BMJ Open	2021	10.1136/bmjopen-2020-042779	Scopus
Geographical variation of emergency hospital admissions for ambulatory care sensitive conditions in older adults in Ireland 2012-2016	Walsh, ME; Cronin, S; Boland, F; Ebell, MH; Fahey, T; Wallace, E	BMJ OPEN	2021	10.1136/bmjopen-2020-042779	WOS
GEOGRAPHICAL VARIATION OF EMERGENCY HOSPITAL ADMISSIONS FOR AMBULATORY CARE SENSITIVE CONDITIONS IN OLDER ADULTS IN THE REPUBLIC OF IRELAND	Walsh, M; Cronin, S; Boland, F; Ebell, M; Wallace, E; Fahey, T	AGE AND AGEING	2019	10.1093/ageing/afz103.51	WOS
Geospatial and Clinical Factors Associated with Frequent Emergency Department Use at a Washington DC Safety Net Hospital	Pines JM, Zocchi MS, Larbi A, Ittickathra P, Elias NK.	J Health Care Poor Underserved	2020	10.1353/hpu.2020.0034	PubMed
Geospatial and clinical factors associated with frequent emergency department use at a Washington DC safety net hospital	Pines, J.M., Zocchi, M.S., Larbi, A., Ittickathra, P., Elias, N.K.	Journal of Health Care for the Poor and Underserved	2020	10.1353/hpu.2020.0034	Scopus
Geospatial and Clinical Factors Associated with Frequent Emergency Department Use at a Washington DC Safety Net Hospital	Pines, JM; Zocchi, MS; Larbi, A; Ittickathra, P; Elias, NK	JOURNAL OF HEALTH CARE FOR THE POOR AND UNDERSERVED	2020	10.1353/hpu.2020.0034	WOS
Geriatric Screening Tools to Select Older Adults Susceptible for Direct Transfer From the Emergency Department to Subacute Intermediate-Care Hospitalization	Inzitari M, Gual N, Roig T, Colprim D, Pérez-Bocanegra C, San-José A, Jimenez X.	J Am Med Dir Assoc	2015	10.1016/j.jamda.2015.04.009	PubMed
Geriatric Screening Tools to Select Older Adults Susceptible for Direct Transfer From the Emergency Department to Subacute Intermediate-Care Hospitalization	Inzitari, M., Gual, N., Roig, T., Colprim, D., Pérez-Bocanegra, C., San-José, A., Jimenez, X.	Journal of the American Medical Directors Association	2015	10.1016/j.jamda.2015.04.009	Scopus
Geriatric Screening Tools to Select Older Adults Susceptible for Direct Transfer From the Emergency Department to Subacute Intermediate-Care Hospitalization	Inzitari, M; Gual, N; Roig, T; Colprim, D; Perez-Bocanegra, C; San-Jose, A; Jimenez, X	JOURNAL OF THE AMERICAN MEDICAL DIRECTORS ASSOCIATION	2015	10.1016/j.jamda.2015.04.009	WOS
Geriatrics and the triple aim: defining preventable hospitalizations in the long-term care population	Ouslander JG, Maslow K.	J Am Geriatr Soc	2012	10.1111/jgs.12002	PubMed
Geriatrics and the triple aim: Defining preventable hospitalizations in the long-term care population	Ouslander, J.G., Maslow, K.	Journal of the American Geriatrics Society	2012	10.1111/jgs.12002	Scopus
Geriatrics and the Triple Aim: Defining Preventable Hospitalizations in the Long-Term Care Population	Ouslander, JG; Maslow, K	JOURNAL OF THE AMERICAN GERIATRICS SOCIETY	2012	10.1111/jgs.12002	WOS
GP FINES FOR AVOIDABLE EMERGENCY ADMISSIONS Rise in emergency admissions is multifactorial	Lewis, LS	BMJ-BRITISH MEDICAL JOURNAL	2013	10.1136/bmj.f2144	WOS
GP supply, deprivation and emergency admission to hospital for COPD and diabetes complications in counties across Ireland: an exploratory analysis	Sexton E, Bedford D.	Ir J Med Sci	2016	10.1007/s11845-015-1359-5	PubMed
GP supply, deprivation and emergency admission to hospital for COPD and diabetes complications in counties across Ireland: an exploratory analysis	Sexton, E., Bedford, D.	Irish Journal of Medical Science	2016	10.1007/s11845-015-1359-5	Scopus
GP supply, deprivation and emergency admission to hospital for COPD and diabetes complications in counties across Ireland: an exploratory analysis	Sexton, E; Bedford, D	IRISH JOURNAL OF MEDICAL SCIENCE	2016	10.1007/s11845-015-1359-5	WOS
GP Training practices in England: a description of their unique features based on national data	Weston C, Ahluwalia S, Bassett P, Lock J, Durbaba S, Ashworth M.	Educ Prim Care	2017	10.1080/14739879.2017.1345649	PubMed
GP Training practices in England: A description of their unique features based on national data	Weston, C., Ahluwalia, S., Bassett, P., Lock, J., Durbaba, S., Ashworth, M.	Education for Primary Care	2017	10.1080/14739879.2017.1345649	Scopus
GP Training practices in England: a description of their unique features based on national data	Weston, C; Ahluwalia, S; Bassett, P; Lock, J; Durbaba, S; Ashworth, M	EDUCATION FOR PRIMARY CARE	2017	10.1080/14739879.2017.1345649	WOS
Guidelines for Field Triage of Injured Patients: In conjunction with the Morbidity and Mortality Weekly Report published by the Center for Disease Control and Prevention	McCoy CE, Chakravarthy B, Lotfipour S.	West J Emerg Med	2013	10.5811/westjem.2013.1.15981	PubMed
Guidelines for field triage of injured patients: recommendations of the National Expert Panel on Field Triage, 2011	Sasser SM, Hunt RC, Faul M, Sugerman D, Pearson WS, Dulski T, Wald MM, Jurkovich GJ, Newgard CD, Lerner EB; Centers for Disease Control and Prevention (CDC).	MMWR Recomm Rep	2012		PubMed
Health care for children and youth in the United States: Annual report on patterns of coverage, utilization, quality, and expenditures by income	Simpson, L; Owens, PL; Zodet, MW; Chevarley, FM; Dougherty, D; Elixhauser, A; McCormick, MC	AMBULATORY PEDIATRICS	2005	10.1367/A04-119R.1	WOS
Health care services utilization stratified by virological and immunological markers of HIV: evidence from a universal health care setting	Druyts, EF; Yip, B; Lima, VD; Burke, TA; Lesovski, D; Fernandes, KA; McInnes, CW; Rustad, CA; Montaner, JSG; Hogg, RS	HIV MEDICINE	2009	10.1111/j.1468-1293.2008.00656.x	WOS
Health Equity Indicators for the English NHS: a longitudinal whole-population study at the small-area level	Cookson R, Asaria M, Ali S, Ferguson B, Fleetcroft R, Goddard M, Goldblatt P, Laudicella M, Raine R.	Health Equity Indicators for the English NHS: a longitudinal whole-population study at the small-area level	2016	10.3310/hsdr04260	PubMed
Health equity monitoring for healthcare quality assurance	Cookson R, Asaria M, Ali S, Shaw R, Doran T, Goldblatt P.	Soc Sci Med	2018	10.1016/j.socscimed.2018.01.004	PubMed
Health equity monitoring for healthcare quality assurance	Cookson, R., Asaria, M., Ali, S., Shaw, R., Doran, T., Goldblatt, P.	Social Science and Medicine	2018	10.1016/j.socscimed.2018.01.004	Scopus
Health equity monitoring for healthcare quality assurance	Cookson, R; Asaria, M; Ali, S; Shaw, R; Doran, T; Goldblatt, P	SOCIAL SCIENCE & MEDICINE	2018	10.1016/j.socscimed.2018.01.004	WOS
Health inequities in unscheduled healthcare for children with intellectual disabilities in Ireland: a study protocol	Nicholson E, Doherty E, Somanadhan S, Guerin S, Schreiber J, Bury G, Kroll T, Raley M, McAuliffe E.	HRB Open Res	2020	10.12688/hrbopenres.12973.2	PubMed
Health information exchange and healthcare utilization	Vest JR.	J Med Syst	2009	10.1007/s10916-008-9183-3	PubMed
Health information exchange and healthcare utilization	Vest, J.R.	Journal of Medical Systems	2009	10.1007/s10916-008-9183-3	Scopus
Health Information Exchange and Healthcare Utilization	Vest, JR	JOURNAL OF MEDICAL SYSTEMS	2009	10.1007/s10916-008-9183-3	WOS
Health insurance, primary care, and preventable hospitalization of children in a large state	Friedman B, Basu J.	Am J Manag Care	2001		PubMed
Health insurance, primary care, and preventable hospitalization of children in a large state	Friedman, B., Basu, J.	American Journal of Managed Care	2001		Scopus
Health insurance, primary care, and preventable hospitalization of children in a large state	Friedman, B; Basu, J	AMERICAN JOURNAL OF MANAGED CARE	2001		WOS
Health literacy of recently hospitalised patients: a cross-sectional survey using the Health Literacy Questionnaire (HLQ)	Jessup RL, Osborne RH, Beauchamp A, Bourne A, Buchbinder R.	BMC Health Serv Res	2017	10.1186/s12913-016-1973-6	PubMed
Health literacy of recently hospitalised patients: a cross-sectional survey using the Health Literacy Questionnaire (HLQ)	Jessup, R.L., Osborne, R.H., Beauchamp, A., Bourne, A., Buchbinder, R.	BMC Health Services Research	2017	10.1186/s12913-016-1973-6	Scopus
Health literacy of recently hospitalised patients: a cross-sectional survey using the Health Literacy Questionnaire (HLQ)	Jessup, RL; Osborne, RH; Beauchamp, A; Bourne, A; Buchbinder, R	BMC HEALTH SERVICES RESEARCH	2017	10.1186/s12913-016-1973-6	WOS
Health Service Utilization Patterns Among Medicaid-Insured Adults With Intellectual and Developmental Disabilities Implications for Access Needs in Outpatient Community-Based Medical Services	Lauer, E; Lindgren, S; Momany, E; Cope, T; Royer, J; Cogan, L; McDermott, S; Armour, B	JOURNAL OF AMBULATORY CARE MANAGEMENT	2021	10.1097/JAC.0000000000000373	WOS
Health Service Utilization Patterns Among Medicaid-Insured Adults With Intellectual and Developmental Disabilities: Implications for Access Needs in Outpatient Community-Based Medical Services	Lauer E, Lindgren S, Momany E, Cope T, Royer J, Cogan L, McDermott S, Armour B.	J Ambul Care Manage	2021	10.1097/JAC.0000000000000373	PubMed
Health Service Utilization Patterns among Medicaid-Insured Adults with Intellectual and Developmental Disabilities: Implications for Access Needs in Outpatient Community-Based Medical Services	Lauer, E., Lindgren, S., Momany, E., Cope, T., Royer, J., Cogan, L., McDermott, S., Armour, B.	Journal of Ambulatory Care Management	2021	10.1097/JAC.0000000000000373	Scopus
Health system influences on potentially avoidable hospital admissions by secondary mental health service use: A national ecological study	Woodhead, C; Martin, P; Osborn, D; Barratt, H; Raine, R	JOURNAL OF HEALTH SERVICES RESEARCH & POLICY		10.1177/13558196211036739	WOS
Heart failure observation units: optimizing care	Peacock WF 4th, Young J, Collins S, Diercks D, Emerman C.	Ann Emerg Med	2006	10.1016/j.annemergmed.2005.07.006	PubMed
Heart failure observation units: Optimizing care	Peacock IV, W.F., Young, J., Collins, S., Diercks, D., Emerman, C.	Annals of Emergency Medicine	2006	10.1016/j.annemergmed.2005.07.006	Scopus
Heart failure observation units: Optimizing care	Peacock, WF; Young, J; Collins, S; Diercks, D; Emerman, C	ANNALS OF EMERGENCY MEDICINE	2006	10.1016/j.annemergmed.2005.07.006	WOS
Heatstroke. A review of clinical manifestations and management	Stanford, J.F.	Missouri Medicine	1986		Scopus
Help is just a phone call away: after-hours support for palliative care patients wishing to die at home	Baird-Bower D, Roach J, Andrews M, Onslow F, Curnin E.	Int J Palliat Nurs	2016	10.12968/ijpn.2016.22.6.286	PubMed
Help is just a phone call away: After-hours support for palliative care patients wishing to die at home	Baird-Bower, D., Roach, J., Andrews, M., Onslow, F., Curnin, E.	International Journal of Palliative Nursing	2016	10.12968/ijpn.2016.22.6.286	Scopus
Help is just a phone call away: after-hours support for palliative care patients wishing to die at home	Baird-Bower, D; Roach, J; Andrews, M; Onslow, F; Curnin, E	INTERNATIONAL JOURNAL OF PALLIATIVE NURSING	2016	10.12968/ijpn.2016.22.6.286	WOS
High rates of premature and potentially preventable death among patients surviving melioidosis in Tropical Australia	Hanson, J., Smith, S.	American Journal of Tropical Medicine and Hygiene	2019	10.4269/ajtmh.19-0375	Scopus
High-cost high-need patients in Medicaid_ segmenting the population eligible for a national complex case management program	Quinton, J.K., Duru, O.K., Jackson, N., Vasilyev, A., Ross-Degnan, D., O’Shea, D.L., Mangione, C.M.	BMC Health Services Research	2021	10.1186/s12913-021-07116-6	Scopus
High-cost high-need patients in Medicaid: segmenting the population eligible for a national complex case management program	Quinton JK, Duru OK, Jackson N, Vasilyev A, Ross-Degnan D, O'Shea DL, Mangione CM.	BMC Health Serv Res	2021	10.1186/s12913-021-07116-6	PubMed
High-cost high-need patients in Medicaid: segmenting the population eligible for a national complex case management program	Quinton, JK; Duru, OK; Jackson, N; Vasilyev, A; Ross-Degnan, D; O'Shea, DL; Mangione, CM	BMC HEALTH SERVICES RESEARCH	2021	10.1186/s12913-021-07116-6	WOS
High-Deductible Insurance: Two-Year Emergency Department and Hospital Use	Wharam, JF; Landon, BE; Zhang, F; Soumerai, SB; Ross-Degnan, D	AMERICAN JOURNAL OF MANAGED CARE	2011		WOS
High-Intensity Telemedicine Decreases Emergency Department Use for Ambulatory Care Sensitive Conditions by Older Adult Senior Living Community Residents	Shah MN, Wasserman EB, Gillespie SM, Wood NE, Wang H, Noyes K, Nelson D, Dozier A, McConnochie KM.	J Am Med Dir Assoc	2015	10.1016/j.jamda.2015.07.009	PubMed
High-Intensity Telemedicine Decreases Emergency Department Use for Ambulatory Care Sensitive Conditions by Older Adult Senior Living Community Residents	Shah, M.N., Wasserman, E.B., Gillespie, S.M., Wood, N.E., Wang, H., Noyes, K., Nelson, D., Dozier, A., McConnochie, K.M.	Journal of the American Medical Directors Association	2015	10.1016/j.jamda.2015.07.009	Scopus
High-Intensity Telemedicine Decreases Emergency Department Use for Ambulatory Care Sensitive Conditions by Older Adult Senior Living Community Residents	Shah, MN; Wasserman, EB; Gillespie, SM; Wood, NE; Wang, HY; Noyes, K; Nelson, D; Dozier, A; McConnochie, KM	JOURNAL OF THE AMERICAN MEDICAL DIRECTORS ASSOCIATION	2015	10.1016/j.jamda.2015.07.009	WOS
Home or hospital for people with dementia and one or more other multimorbidities: What is the potential to reduce avoidable emergency admissions? The HOMEWARD Project Protocol	Voss S, Black S, Brandling J, Buswell M, Cheston R, Cullum S, Kirby K, Purdy S, Solway C, Taylor H, Benger J.	BMJ Open	2017	10.1136/bmjopen-2017-016651	PubMed
Home or hospital for people with dementia and one or more other multimorbidities: What is the potential to reduce avoidable emergency admissions? the HOMEWARD Project Protocol	Voss, S., Black, S., Brandling, J., Buswell, M., Cheston, R., Cullum, S., Kirby, K., Purdy, S., Solway, C., Taylor, H., Benger, J.	BMJ Open	2017	10.1136/bmjopen-2017-016651	Scopus
Home or hospital for people with dementia and one or more other multimorbidities: What is the potential to reduce avoidable emergency admissions? The HOMEWARD Project Protocol	Voss, S; Black, S; Brandling, J; Buswell, M; Cheston, R; Cullum, S; Kirby, K; Purdy, S; Solway, C; Taylor, H; Benger, J	BMJ OPEN	2017	10.1136/bmjopen-2017-016651	WOS
Hospital admissions and emergency department presentations for dental conditions indicate access to hospital, rather than poor access to dental health care in the community	Yap M, Kok MR, Nanda S, Vickery A, Whyatt D.	Aust J Prim Health	2018	10.1071/PY17044	PubMed
Hospital admissions and emergency department presentations for dental conditions indicate access to hospital, rather than poor access to dental health care in the community	Yap, M., Kok, M.-R., Nanda, S., Vickery, A., Whyatt, D.	Australian Journal of Primary Health	2018	10.1071/PY17044	Scopus
Hospital admissions and emergency department presentations for dental conditions indicate access to hospital, rather than poor access to dental health care in the community	Yap, M; Kok, MR; Nanda, S; Vickery, A; Whyatt, D	AUSTRALIAN JOURNAL OF PRIMARY HEALTH	2018	10.1071/PY17044	WOS
Hospital admissions and place of death of residents of care homes receiving specialist healthcare services: A systematic review without meta-analysis	Buck, D; Tucker, S; Roe, B; Hughes, J; Challis, D	JOURNAL OF ADVANCED NURSING		10.1111/jan.15043	WOS
Hospital And ED Use Among Medicare Beneficiaries With Dementia Varies By Setting And Proximity To Death	Feng, ZL; Coots, LA; Kaganova, Y; Wiener, JM	HEALTH AFFAIRS	2014	10.1377/hlthaff.2013.1179	WOS
Hospital care for viral gastroenteritis in socio-economic and geographical context in Sweden 2006-2013	Lind J, Schollin Ask L, Juarez S, Hjern A.	Acta Paediatr	2018	10.1111/apa.14429	PubMed
Hospital care for viral gastroenteritis in socio-economic and geographical context in Sweden 2006-2013	Lind, J; Ask, LS; Juarez, S; Hjern, A	ACTA PAEDIATRICA	2018	10.1111/apa.14429	WOS
Hospital care for viral gastroenteritis in socio-economic and geographical context in Sweden 2006–2013	Lind, J., Schollin Ask, L., Juarez, S., Hjern, A.	Acta Paediatrica, International Journal of Paediatrics	2018	10.1111/apa.14429	Scopus
Hospital characteristics affecting potentially avoidable emergency admissions: national ecological study	O'Cathain A, Knowles E, Maheswaran R, Turner J, Hirst E, Goodacre S, Pearson T, Nicholl J.	Health Serv Manage Res	2013	10.1177/0951484814525357	PubMed
Hospital characteristics affecting potentially avoidable emergency admissions: National ecological study	O'Cathain, A., Knowles, E., Maheswaran, R., Turner, J., Hirst, E., Goodacre, S., Pearson, T., Nicholl, J.	Health Services Management Research	2013	10.1177/0951484814525357	Scopus
Hospital charges of potentially preventable pediatric hospitalizations	Lu S, Kuo DZ.	Acad Pediatr	2012	10.1016/j.acap.2012.06.006	PubMed
Hospital charges of potentially preventable pediatric hospitalizations	Lu, S., Kuo, D.Z.	Academic Pediatrics	2012	10.1016/j.acap.2012.06.006	Scopus
Hospital Charges of Potentially Preventable Pediatric Hospitalizations	Lu, S; Kuo, DZ	ACADEMIC PEDIATRICS	2012	10.1016/j.acap.2012.06.006	WOS
Hospital readmissions necessary evil or preventable target for quality improvement	Brown, E.G., Burgess, D., Li, C.S., Canter, R.J., Bold, R.J.	Annals of Surgery	2014	10.1097/SLA.0000000000000923	Scopus
Hospital Readmissions Necessary Evil or Preventable Target for Quality Improvement	Brown, EG; Burgess, D; Li, CS; Canter, RJ; Bold, RJ	ANNALS OF SURGERY	2014	10.1097/SLA.0000000000000923	WOS
Hospital readmissions: necessary evil or preventable target for quality improvement	Brown EG, Burgess D, Li CS, Canter RJ, Bold RJ.	Ann Surg	2014	10.1097/SLA.0000000000000923	PubMed
Hospital Transfer Rates Among US Nursing Home Residents With Advanced Illness Before and After Initiatives to Reduce Hospitalizations	McCarthy, EP; Ogarek, JA; Loomer, L; Gozalo, PL; Mor, V; Hamel, MB; Mitchell, SL	JAMA INTERNAL MEDICINE	2020	10.1001/jamainternmed.2019.6130	WOS
Hospital Transfers of Skilled Nursing Facility (SNF) Patients Within 48 Hours and 30 Days After SNF Admission	Ouslander, JG; Naharci, I; Engstrom, G; Shutes, J; Wolf, DG; Rojido, M; Tappen, R; Newman, D	JOURNAL OF THE AMERICAN MEDICAL DIRECTORS ASSOCIATION	2016	10.1016/j.jamda.2016.05.021	WOS
Hospital Utilization and Characteristics of Patients Experiencing Recurrent Readmissions Within Children's Hospitals	Berry, JG; Hall, DE; Kuo, DZ; Cohen, E; Agrawal, R; Feudtner, C; Hall, M; Kueser, J; Kaplan, W; Neff, J	JAMA-JOURNAL OF THE AMERICAN MEDICAL ASSOCIATION	2011	10.1001/jama.2011.122	WOS
Hospitalization for ambulatory-care-sensitive conditions in Taiwan following the SARS outbreak: A population-based interrupted time series study	Huang, Y.-T., Lee, Y.-C., Hsiao, C.-J.	Journal of the Formosan Medical Association	2009	10.1016/S0929-6646(09)60082-6	Scopus
Hospitalization for Ambulatory-care-sensitive Conditions in Taiwan Following the SARS Outbreak: A Population-based Interrupted Time Series Study	Huang, YT; Lee, YC; Hsiao, CJ	JOURNAL OF THE FORMOSAN MEDICAL ASSOCIATION	2009	10.1016/S0929-6646(09)60082-6	WOS
Hospitalization for uncomplicated hypertension: An ambulatory care sensitive condition	Walker, R.L., Chen, G., McAlister, F.A., Campbell, N.R.C., Hemmelgarn, B.R., Dixon, E., Ghali, W., Rabi, D., Tu, K., Jette, N., Quan, H.	Canadian Journal of Cardiology	2013	10.1016/j.cjca.2013.05.002	Scopus
Hospitalization for urinary tract infections and the quality of preventive health care received by people with spina bifida	Armour, BS; Ouyang, LJ; Thibadeau, J; Grosse, SD; Campbell, VA; Joseph, D	DISABILITY AND HEALTH JOURNAL	2009	10.1016/j.dhjo.2009.02.001	WOS
Hospitalizations and emergency room visits for adolescents and young adults with muscular dystrophy living in South Carolina	Mann JR, Royer JA, Mcdermott S, Hardin JW, Ozturk O, Street N.	Muscle Nerve	2015	10.1002/mus.24599	PubMed
Hospitalizations and emergency room visits for adolescents and young adults with muscular dystrophy living in South Carolina	Mann, J.R., Royer, J.A., Mcdermott, S., Hardin, J.W., Ozturk, O., Street, N.	Muscle and Nerve	2015	10.1002/mus.24599	Scopus
Hospitalizations and emergency room visits for adolescents and young adults with muscular dystrophy living in South Carolina	Mann, JR; Royer, JA; McDermott, S; Hardin, JW; Ozturk, O; Street, N	MUSCLE & NERVE	2015	10.1002/mus.24599	WOS
How a universal health system reduces inequalities: lessons from England	Asaria M, Ali S, Doran T, Ferguson B, Fleetcroft R, Goddard M, Goldblatt P, Laudicella M, Raine R, Cookson R.	J Epidemiol Community Health	2016	10.1136/jech-2015-206742	PubMed
How a universal health system reduces inequalities: Lessons from England	Asaria, M., Ali, S., Doran, T., Ferguson, B., Fleetcroft, R., Goddard, M., Goldblatt, P., Laudicella, M., Raine, R., Cookson, R.	Journal of Epidemiology and Community Health	2016	10.1136/jech-2015-206742	Scopus
How a universal health system reduces inequalities: lessons from England	Asaria, M; Ali, S; Doran, T; Ferguson, B; Fleetcroft, R; Goddard, M; Goldblatt, P; Laudicella, M; Raine, R; Cookson, R	JOURNAL OF EPIDEMIOLOGY AND COMMUNITY HEALTH	2016	10.1136/jech-2015-206742	WOS
How does the type of remunerati on affect physi ci an behavi or? Fixed salary versus fee-for-service	Brekke, K.R., Holmås, T.H., Monstad, K., Straume, O.R.	American Journal of Health Economics	2020	10.1086/706624	Scopus
How Does The Type of Remuneration Affect Physician Behavior? Fixed Salary versus Fee-for-Service	Brekke, KR; Holmas, TH; Monstad, K; Straume, OR	AMERICAN JOURNAL OF HEALTH ECONOMICS	2020	10.1086/706624	WOS
How much emergency department use by vulnerable populations is potentially preventable?: A period prevalence study of linked public hospital data in South Australia	Banham D, Karnon J, Densley K, Lynch JW.	BMJ Open	2019	10.1136/bmjopen-2018-022845	PubMed
How much emergency department use by vulnerable populations is potentially preventable?: A period prevalence study of linked public hospital data in South Australia	Banham, D., Karnon, J., Densley, K., Lynch, J.W.	BMJ Open	2019	10.1136/bmjopen-2018-022845	Scopus
How much emergency department use by vulnerable populations is potentially preventable?: A period prevalence study of linked public hospital data in South Australia	Banham, D; Karnon, J; Densley, K; Lynch, JW	BMJ OPEN	2019	10.1136/bmjopen-2018-022845	WOS
How to save a bundle hospital readmissions	Butcher, L.	Managed Care	2009		Scopus
Hypothyroidism-Related Cardiac Tamponade	Kaur H, Chakwop Ngassa H, Elmenawi KA, Anil V, Gosal H, Mohammed L.	Cureus	2021	10.7759/cureus.18611	PubMed
Hypothyroidism-Related Cardiac Tamponade	Kaur, H; Ngassa, HC; Elmenawi, KA; Anil, V; Gosal, H; Mohammed, L	CUREUS	2021	10.7759/cureus.18611	WOS
Identification of appropriate and potentially avoidable emergency department referrals in a tertiary cancer care center	Duflos C, Antoun S, Loirat P, DiPalma M, Minvielle E.	Support Care Cancer	2017	10.1007/s00520-017-3611-1	PubMed
Identification of appropriate and potentially avoidable emergency department referrals in a tertiary cancer care center	Duflos, C., Antoun, S., Loirat, P., DiPalma, M., Minvielle, E.	Supportive Care in Cancer	2017	10.1007/s00520-017-3611-1	Scopus
Identification of appropriate and potentially avoidable emergency department referrals in a tertiary cancer care center	Duflos, C; Antoun, S; Loirat, P; DiPalma, M; Minvielle, E	SUPPORTIVE CARE IN CANCER	2017	10.1007/s00520-017-3611-1	WOS
Identification of institutional characteristics that may drive (avoidable) hospitalization of nursing home residents	Hong, Z., Seidmann, A.	Proceedings of the Annual Hawaii International Conference on System Sciences	2020		Scopus
Identification of potentially avoidable hospitalizations in patients with GI cancer	Brooks, G.A., Abrams, T.A., Meyerhardt, J.A., Enzinger, P.C., Sommer, K., Dalby, C.K., Uno, H., Jacobson, J.O., Fuchs, C.S., Schrag, D.	Journal of Clinical Oncology	2014	10.1200/JCO.2013.52.4330	Scopus
Identifying Older Patients at High Risk for Emergency Department Visits and Hospitalization	Salzman BE, Knuth RV, Cunningham AT, LaNoue MD.	Popul Health Manag	2019	10.1089/pop.2018.0136	PubMed
Identifying Older Patients at High Risk for Emergency Department Visits and Hospitalization	Salzman, B.E., Knuth, R.V., Cunningham, A.T., Lanoue, M.D.	Population Health Management	2019	10.1089/pop.2018.0136	Scopus
Identifying Older Patients at High Risk for Emergency Department Visits and Hospitalization	Salzman, BE; Knuth, RV; Cunningham, AT; LaNoue, MD	POPULATION HEALTH MANAGEMENT	2019	10.1089/pop.2018.0136	WOS
Identifying patients at high risk of emergency hospital admissions: a logistic regression analysis	Bottle A, Aylin P, Majeed A.	J R Soc Med	2006	10.1258/jrsm.99.8.406	PubMed
Identifying patients at high risk of emergency hospital admissions: A logistic regression analysis	Bottle, A., Aylin, P., Majeed, A.	Journal of the Royal Society of Medicine	2006	10.1258/jrsm.99.8.406	Scopus
Identifying patients at high risk of emergency hospital admissions: a logistic regression analysis	Bottle, A; Aylin, P; Majeed, A	JOURNAL OF THE ROYAL SOCIETY OF MEDICINE	2006	10.1258/jrsm.99.8.406	WOS
Identifying potentially avoidable hospital admissions from canadian long-term care facilities	Walker, J.D., Teare, G.F., Hogan, D.B., Lewis, S., Maxwell, C.J.	Medical Care	2009	10.1097/MLR.0b013e3181847588	Scopus
Identifying Potentially Preventable Emergency Department Visits by Nursing Home Residents in the United States	Burke, RE; Rooks, SP; Levy, C; Schwartz, R; Ginde, AA	JOURNAL OF THE AMERICAN MEDICAL DIRECTORS ASSOCIATION	2015	10.1016/j.jamda.2015.01.076	WOS
Impact Evaluation of a System-Wide Chronic Disease Management Program on Health Service Utilisation: A Propensity-Matched Cohort Study	Billot L, Corcoran K, McDonald A, Powell-Davies G, Feyer AM.	PLoS Med	2016	10.1371/journal.pmed.1002035	PubMed
Impact Evaluation of a System-Wide Chronic Disease Management Program on Health Service Utilisation: A Propensity-Matched Cohort Study	Billot, L., Corcoran, K., McDonald, A., Powell-Davies, G., Feyer, A.-M.	PLoS Medicine	2016	10.1371/journal.pmed.1002035	Scopus
Impact Evaluation of a System-Wide Chronic Disease Management Program on Health Service Utilisation: A Propensity-Matched Cohort Study	Billot, L; Corcoran, K; McDonald, A; Powell-Davies, G; Feyer, AM	PLOS MEDICINE	2016	10.1371/journal.pmed.1002035	WOS
Impact of a Medicaid primary care provider and preventive care on pediatric hospitalization	Gadomski A, Jenkins P, Nichols M.	Pediatrics	1998	10.1542/peds.101.3.e1	PubMed
Impact of a Medicaid primary care provider and preventive care on pediatric hospitalization	Gadomski, A; Jenkins, P; Nichols, M	PEDIATRICS	1998	10.1542/peds.101.3.e1	WOS
Impact of a Medicaid primary care provider and preventive care on pediatric hospitalization.	Gadomski, A., Jenkins, P., Nichols, M.	Pediatrics	1998	10.1542/peds.101.3.e1	Scopus
Impact of a Multidisciplinary Treatment Pathway for Atrial Fibrillation in the Emergency Department on Hospital Admissions and Length of Stay: Results of a Multi-Center Study	Ptaszek LM, Baugh CW, Lubitz SA, Ruskin JN, Ha G, Forsch M, DeOliveira SA, Baig S, Heist EK, Wasfy JH, Brown DF, Biddinger PD, Raja AS, Scirica B, White BA, Mansour M.	J Am Heart Assoc	2019	10.1161/JAHA.119.012656	PubMed
Impact of a multidisciplinary treatment pathway for atrial fibrillation in the emergency department on hospital admissions and length of stay: Results of a multi-center study	Ptaszek, L.M., Baugh, C.W., Lubitz, S.A., Ruskin, J.N., Ha, G., Forsch, M., Deoliveira, S.A., Baig, S., Heist, E.K., Wasfy, J.H., Brown, D.F., Biddinger, P.D., Raja, A.S., Scirica, B., White, B.A., Mansour, M.	Journal of the American Heart Association	2019	10.1161/JAHA.119.012656	Scopus
Impact of a Multidisciplinary Treatment Pathway for Atrial Fibrillation in the Emergency Department on Hospital Admissions and Length of Stay: Results of a Multi-Center Study	Ptaszek, LM; Baugh, CW; Lubitz, SA; Ruskin, JN; Ha, G; Forsch, M; DeOliveira, SA; Baig, S; Heist, EK; Wasfy, JH; Brown, DF; Biddinger, PD; Raja, AS; Scirica, B; White, BA; Mansour, M	JOURNAL OF THE AMERICAN HEART ASSOCIATION	2019	10.1161/JAHA.119.012656	WOS
Impact of a provincial quality-improvement program on primary health care in Ontario: a population-based controlled before-and-after study	Green ME, Harris SB, Webster-Bogaert S, Han H, Kotecha J, Kopp A, Ho MM, Birtwhistle RV, Glazier RH.	CMAJ Open	2017	10.9778/cmajo.20160104	PubMed
Impact of Critical Illness on Resource Utilization: A Comparison of Use in the Year Before and After ICU Admission	Hirshberg EL, Wilson EL, Stanfield V, Kuttler KG, Majercik S, Beesley SJ, Orme J, Hopkins RO, Brown SM.	Crit Care Med	2019	10.1097/CCM.0000000000003970	PubMed
Impact of Critical Illness on Resource Utilization: A Comparison of Use in the Year Before and After ICU Admission	Hirshberg, E.L., Wilson, E.L., Stanfield, V., Kuttler, K.G., Majercik, S., Beesley, S.J., Orme, J., Hopkins, R.O., Brown, S.M.	Critical care medicine	2019	10.1097/CCM.0000000000003970	Scopus
Impact of Critical Illness on Resource Utilization: A Comparison of Use in the Year Before and After ICU Admission*	Hirshberg, EL; Wilson, EL; Stanfield, V; Kuttler, KG; Majercik, S; Beesley, SJ; Orme, J; Hopkins, RO; Brown, SM	CRITICAL CARE MEDICINE	2019	10.1097/CCM.0000000000003970	WOS
Impact of electronic diabetes registry 'Meaningful Use' on quality of care and hospital utilization	Han W, Sharman R, Heider A, Maloney N, Yang M, Singh R.	J Am Med Inform Assoc	2016	10.1093/jamia/ocv040	PubMed
Impact of electronic diabetes registry 'meaningful use' on quality of care and hospital utilization	Han, W., Sharman, R., Heider, A., Maloney, N., Yang, M., Singh, R.	Journal of the American Medical Informatics Association	2016	10.1093/jamia/ocv040	Scopus
Impact of electronic diabetes registry 'Meaningful Use' on quality of care and hospital utilization	Han, WC; Sharman, R; Heider, A; Maloney, N; Yang, M; Singh, R	JOURNAL OF THE AMERICAN MEDICAL INFORMATICS ASSOCIATION	2016	10.1093/jamia/ocv040	WOS
Impact of emerging health insurance arrangements on diabetes outcomes and disparities: rationale and study design	Wharam JF, Soumerai S, Trinacty C, Eggleston E, Zhang F, LeCates R, Canning C, Ross-Degnan D.	Prev Chronic Dis	2013	10.5888/pcd10.120147	PubMed
Impact of emerging health insurance arrangements on diabetes outcomes and disparities: Rationale and study design	Frank Wharam, J., Soumerai, S., Trinacty, C., Eggleston, E., Zhang, F., LeCates, R., Canning, C., Ross-Degnan, D.	Preventing Chronic Disease	2013	10.5888/pcd10.120147	Scopus
Impact of Emerging Health Insurance Arrangements on Diabetes Outcomes and Disparities: Rationale and Study Design	Wharam, JF; Soumerai, S; Trinacty, C; Eggleston, E; Zhang, F; LeCates, R; Canning, C; Ross-Degnan, D	PREVENTING CHRONIC DISEASE	2013	10.5888/pcd10.120147	WOS
Impact of family physician integrated care program on decreasing utilization of emergency department visit and hospital admission: a population-based retrospective cohort study	Huang, PT; Kung, PT; Kuo, WY; Tsai, WC	BMC HEALTH SERVICES RESEARCH	2020	10.1186/s12913-020-05347-7	WOS
Impact of family practice continuity of care on unplanned hospital use for people with serious mental illness	Ride J, Kasteridis P, Gutacker N, Doran T, Rice N, Gravelle H, Kendrick T, Mason A, Goddard M, Siddiqi N, Gilbody S, Williams R, Aylott L, Dare C, Jacobs R.	Health Serv Res	2019	10.1111/1475-6773.13211	PubMed
Impact of family practice continuity of care on unplanned hospital use for people with serious mental illness	Ride, J., Kasteridis, P., Gutacker, N., Doran, T., Rice, N., Gravelle, H., Kendrick, T., Mason, A., Goddard, M., Siddiqi, N., Gilbody, S., Williams, R., Aylott, L., Dare, C., Jacobs, R.	Health Services Research	2019	10.1111/1475-6773.13211	Scopus
Impact of family practice continuity of care on unplanned hospital use for people with serious mental illness	Ride, J; Kasteridis, P; Gutacker, N; Doran, T; Rice, N; Gravelle, H; Kendrick, T; Mason, A; Goddard, M; Siddiqi, N; Gilbody, S; Williams, R; Aylott, L; Dare, C; Jacobs, R	HEALTH SERVICES RESEARCH	2019	10.1111/1475-6773.13211	WOS
Impact of individualized pain plan on the emergency management of children with sickle cell disease	Krishnamurti L, Smith-Packard B, Gupta A, Campbell M, Gunawardena S, Saladino R.	Pediatr Blood Cancer	2014	10.1002/pbc.25024	PubMed
Impact of individualized pain plan on the emergency management of children with sickle cell disease	Krishnamurti, L., Smith-Packard, B., Gupta, A., Campbell, M., Gunawardena, S., Saladino, R.	Pediatric Blood and Cancer	2014	10.1002/pbc.25024	Scopus
Impact of Individualized Pain Plan on the Emergency Management of Children With Sickle Cell Disease	Krishnamurti, L; Smith-Packard, B; Gupta, A; Campbell, M; Gunawardena, S; Saladino, R	PEDIATRIC BLOOD & CANCER	2014	10.1002/pbc.25024	WOS
Impact of mental illness on care for somatic comorbidities in France: a nation-wide hospital-based observational study	Gervaix J, Haour G, Michel M, Chevreul K.	Epidemiol Psychiatr Sci	2019	10.1017/S2045796018000203	PubMed
Impact of mental illness on care for somatic comorbidities in France: A nation-wide hospital-based observational study	Gervaix, J., Haour, G., Michel, M., Chevreul, K.	Epidemiology and Psychiatric Sciences	2019	10.1017/S2045796018000203	Scopus
Impact of mental illness on care for somatic comorbidities in France: a nation-wide hospital-based observational study	Gervaix, J; Haour, G; Michel, M; Chevreul, K	EPIDEMIOLOGY AND PSYCHIATRIC SCIENCES	2019	10.1017/S2045796018000203	WOS
Impact of minimal injuries on a level I trauma center	Hoff WS, Tinkoff GH, Lucke JF, Lehr S.	J Trauma	1992	10.1097/00005373-199209000-00012	PubMed
Impact of minimal injuries on a level i trauma center	Hoff, W.S., Tinkoff, G.H., Lucke, J.F., Lehr, S.	Journal of Trauma - Injury, Infection and Critical Care	1992	10.1097/00005373-199209000-00012	Scopus
IMPACT OF MINIMAL INJURIES ON A LEVEL-I TRAUMA CENTER	HOFF, WS; TINKOFF, GH; LUCKE, JF; LEHR, S	JOURNAL OF TRAUMA-INJURY INFECTION AND CRITICAL CARE	1992	10.1097/00005373-199209000-00012	WOS
Impact of Post-hospital Syndrome on Outcomes Following Elective, Ambulatory Surgery	Brownlee, SA; Blackwell, RH; Blanco, BA; Zapf, MAC; Kliethermes, S; Gupta, GN; Kuo, PC; Kothari, AN	ANNALS OF SURGERY	2017	10.1097/SLA.0000000000001965	WOS
Impact of the Affordable Care Act Medicaid expansion on emergency department high utilizers with ambulatory care sensitive conditions: A cross-sectional study	Gingold DB, Pierre-Mathieu R, Cole B, Miller AC, Khaldun JS.	Am J Emerg Med	2017	10.1016/j.ajem.2017.01.014	PubMed
Impact of the Affordable Care Act Medicaid expansion on emergency department high utilizers with ambulatory care sensitive conditions: A cross-sectional study	Gingold, D.B., Pierre-Mathieu, R., Cole, B., Miller, A.C., Khaldun, J.S.	American Journal of Emergency Medicine	2017	10.1016/j.ajem.2017.01.014	Scopus
Impact of the Affordable Care Act Medicaid expansion on emergency department high utilizers with ambulatory care sensitive conditions: A cross-sectional study	Gingold, DB; Pierre-Mathieu, R; Cole, B; Miller, AC; Khaldun, JS	AMERICAN JOURNAL OF EMERGENCY MEDICINE	2017	10.1016/j.ajem.2017.01.014	WOS
Impact of the Southwark and Lambeth Integrated Care Older People's Programme on hospital utilisation and costs: controlled time series and cost-consequence analysis	Exley J, Abel GA, Fernandez JL, Pitchforth E, Mendonca S, Yang M, Roland M, McGuire A.	BMJ Open	2019	10.1136/bmjopen-2018-024220	PubMed
Impact of the Southwark and Lambeth Integrated Care Older People's Programme on hospital utilisation and costs: Controlled time series and cost-consequence analysis	Exley, J., Abel, G.A., Fernandez, J.-L., Pitchforth, E., Mendonca, S., Yang, M., Roland, M., McGuire, A.	BMJ Open	2019	10.1136/bmjopen-2018-024220	Scopus
Impact of the Southwark and Lambeth Integrated Care Older People's Programme on hospital utilisation and costs: controlled time series and cost-consequence analysis	Exley, J; Abel, GA; Fernandez, JL; Pitchforth, E; Mendonca, S; Yang, MQ; Roland, M; McGuire, A	BMJ OPEN	2019	10.1136/bmjopen-2018-024220	WOS
Impact on seniors of the patient-centered medical home: evidence from a pilot study	Fishman PA, Johnson EA, Coleman K, Larson EB, Hsu C, Ross TR, Liss D, Tufano J, Reid RJ.	Gerontologist	2012	10.1093/geront/gnr158	PubMed
Impact on seniors of the patient-centered medical home: Evidence from a pilot study	Fishman, P.A., Johnson, E.A., Coleman, K., Larson, E.B., Hsu, C., Ross, T.R., Liss, D., Tufano, J., Reid, R.J.	Gerontologist	2012	10.1093/geront/gnr158	Scopus
Impact on Seniors of the Patient-Centered Medical Home: Evidence From a Pilot Study	Fishman, PA; Johnson, EA; Coleman, K; Larson, EB; Hsu, C; Ross, TR; Liss, D; Tufano, J; Reid, RJ	GERONTOLOGIST	2012	10.1093/geront/gnr158	WOS
Implementation and Effect of a Pharmacist-to-Pharmacist Transitions of Care Initiative on Ambulatory Care Sensitive Conditions	McFarland MS, Thomas AM, Young E, Bryant C, Hughes JC, Hoffman J, Baker JW.	J Manag Care Spec Pharm	2020	10.18553/jmcp.2020.26.4.513	PubMed
Implementation and effect of a pharmacist-to-pharmacist transitions of care initiative on ambulatory care sensitive conditions	McFarland, M.S., Thomas, A.M., Young, E., Bryant, C., Hughes, J.C., Hoffman, J., Baker, J.W.	Journal of Managed Care and Specialty Pharmacy	2020	10.18553/jmcp.2020.26.4.513	Scopus
Implementation and Effect of a Pharmacist-to-Pharmacist Transitions of Care Initiative on Ambulatory Care Sensitive Conditions	McFarland, MS; Thomas, AM; Young, E; Bryant, C; Hughes, JC; Hoffman, J; Baker, JW	JOURNAL OF MANAGED CARE & SPECIALTY PHARMACY	2020		WOS
Implementation of a Protocol to Manage Patients at Risk for Hospitalization Due to an Ambulatory Care Sensitive Condition	Kuecker CM, Kashyap A, Seckel E.	Fed Pract	2020	10.12788/fp.0030	PubMed
Implementation of an outpatient electronic health record and emergency department visits, hospitalizations, and office visits among patients with diabetes	Reed M, Huang J, Brand R, Graetz I, Neugebauer R, Fireman B, Jaffe M, Ballard DW, Hsu J.	JAMA	2013	10.1001/jama.2013.276733	PubMed
Implementation of an outpatient electronic health record and emergency department visits, hospitalizations, and office visits among patients with diabetes	Reed, M., Huang, J., Brand, R., Graetz, I., Neugebauer, R., Fireman, B., Jaffe, M., Ballard, D.W., Hsu, J.	JAMA - Journal of the American Medical Association	2013	10.1001/jama.2013.276733	Scopus
Implementation of an Outpatient Electronic Health Record and Emergency Department Visits, Hospitalizations, and Office Visits Among Patients With Diabetes	Reed, M; Huang, J; Brand, R; Graetz, I; Neugebauer, R; Fireman, B; Jaffe, M; Ballard, DW; Hsu, J	JAMA-JOURNAL OF THE AMERICAN MEDICAL ASSOCIATION	2013	10.1001/jama.2013.276733	WOS
Implementation of complex adaptive chronic care: the Patient Journey Record system (PaJR)	Martin CM, Vogel C, Grady D, Zarabzadeh A, Hederman L, Kellett J, Smith K, O' Shea B.	J Eval Clin Pract	2012	10.1111/j.1365-2753.2012.01880.x	PubMed
Implementation of complex adaptive chronic care: The Patient Journey Record system (PaJR)	Martin, C.M., Vogel, C., Grady, D., Zarabzadeh, A., Hederman, L., Kellett, J., Smith, K., O'Shea, B.	Journal of Evaluation in Clinical Practice	2012	10.1111/j.1365-2753.2012.01880.x	Scopus
Implementation of complex adaptive chronic care: the Patient Journey Record system (PaJR)	Martin, CM; Vogel, C; Grady, D; Zarabzadeh, A; Hederman, L; Kellett, J; Smith, K; O' Shea, B	JOURNAL OF EVALUATION IN CLINICAL PRACTICE	2012	10.1111/j.1365-2753.2012.01880.x	WOS
Implementation of Health Links coordinated care plans for adults with intellectual and developmental disabilities Cross-sectoral pilot program	Martin, M.I., Grier, E., Bobbette, N., Casson, I., Durbin, J., Gemmill, M., Lunsky, Y., Ouellette-Kuntz, H.	Canadian Family Physician	2019		Scopus
Implementation of Health Links coordinated care plans for adults with intellectual and developmental disabilities Cross-sectoral pilot program	Martin, MI; Grier, E; Bobbette, N; Casson, I; Durbin, J; Gemmill, M; Lunsky, Y; Ouellette-Kuntz, H	CANADIAN FAMILY PHYSICIAN	2019		WOS
Implementation of Health Links coordinated care plans for adults with intellectual and developmental disabilities: Cross-sectoral pilot program	Martin MI, Grier E, Bobbette N, Casson I, Durbin J, Gemmill M, Lunsky Y, Ouellette-Kuntz H.	Can Fam Physician	2019		PubMed
Implementation of Telemedicine Consultation to Assess Unplanned Transfers in Rural Long-Term Care Facilities, 2012-2015: A Pilot Study	Hofmeyer J, Leider JP, Satorius J, Tanenbaum E, Basel D, Knudson A.	J Am Med Dir Assoc	2016	10.1016/j.jamda.2016.06.014	PubMed
Implementation of Telemedicine Consultation to Assess Unplanned Transfers in Rural Long-Term Care Facilities, 2012-2015: A Pilot Study	Hofmeyer, J; Leider, JP; Satorius, J; Tanenbaum, E; Basel, D; Knudson, A	JOURNAL OF THE AMERICAN MEDICAL DIRECTORS ASSOCIATION	2016	10.1016/j.jamda.2016.06.014	WOS
Implementation of Telemedicine Consultation to Assess Unplanned Transfers in Rural Long-Term Care Facilities, 2012–2015: A Pilot Study	Hofmeyer, J., Leider, J.P., Satorius, J., Tanenbaum, E., Basel, D., Knudson, A.	Journal of the American Medical Directors Association	2016	10.1016/j.jamda.2016.06.014	Scopus
Implementation of the Patient-Centered Medical Home in the Veterans Health Administration Associations With Patient Satisfaction, Quality of Care, Staff Burnout, and Hospital and Emergency Department Use	Nelson, KM; Helfrich, C; Sun, HL; Hebert, PL; Liu, CF; Dolan, E; Taylor, L; Wong, E; Maynard, C; Hernandez, SE; Sanders, W; Randall, I; Curtis, I; Schectman, G; Stark, R; Fihn, SD	JAMA INTERNAL MEDICINE	2014	10.1001/jamainternmed.2014.2488	WOS
Implementation of the patient-centered medical home in the Veterans Health Administration: associations with patient satisfaction, quality of care, staff burnout, and hospital and emergency department use	Nelson KM, Helfrich C, Sun H, Hebert PL, Liu CF, Dolan E, Taylor L, Wong E, Maynard C, Hernandez SE, Sanders W, Randall I, Curtis I, Schectman G, Stark R, Fihn SD.	JAMA Intern Med	2014	10.1001/jamainternmed.2014.2488	PubMed
Implementation of the patient-centered medical home in the veterans health administration: Associations with patient satisfaction, quality of care, staff burnout, and hospital and emergency department use	Nelson, K.M., Helfrich, C., Sun, H., Hebert, P.L., Liu, C.-F., Dolan, E., Taylor, L., Wong, E., Maynard, C., Hernandez, S.E., Sanders, W., Randall, I., Curtis, I., Schectman, G., Stark, R., Fihn, S.D.	JAMA Internal Medicine	2014	10.1001/jamainternmed.2014.2488	Scopus
Improvements in diabetes management and outcomes in a Medicaid managed care system	Bailey JE, Womeodu RJ, Wan JY, Van Brunt DL, Somes GW.	Tenn Med	2001		PubMed
Improvements in diabetes management and outcomes in a Medicaid managed care system.	Bailey, J.E., Womeodu, R.J., Wan, J.Y., Van Brunt, D.L., Somes, G.W.	Tennessee medicine : journal of the Tennessee Medical Association	2001		Scopus
Improving continuity of patient care across sectors: study protocol of a quasi-experimental multi-centre study regarding an admission and discharge model in Germany (VESPEERA)	Forstner J, Straßner C, Kunz A, Uhlmann L, Freund T, Peters-Klimm F, Wensing M, Kümmel S, El-Kurd N, Rück R, Handlos B, Szecsenyi J.	BMC Health Serv Res	2019	10.1186/s12913-019-4022-4	PubMed
Improving continuity of patient care across sectors: Study protocol of a quasi-experimental multi-centre study regarding an admission and discharge model in Germany (VESPEERA)	Forstner, J., Straßner, C., Kunz, A., Uhlmann, L., Freund, T., Peters-Klimm, F., Wensing, M., Kümmel, S., El-Kurd, N., Rück, R., Handlos, B., Szecsenyi, J.	BMC Health Services Research	2019	10.1186/s12913-019-4022-4	Scopus
Improving continuity of patient care across sectors: study protocol of a quasi-experimental multi-centre study regarding an admission and discharge model in Germany (VESPEERA)	Forstner, J; Strassner, C; Kunz, A; Uhlmann, L; Freund, T; Peters-Klimm, F; Wensing, M; Kummel, S; El-Kurd, N; Ruck, R; Handlos, B; Szecsenyi, J	BMC HEALTH SERVICES RESEARCH	2019	10.1186/s12913-019-4022-4	WOS
Improving diabetic patient transition to home healthcare: Leading risk factors for 30-day readmission	Chen, H.-F., Popoola, T., Radhakrishnan, K., Suzuki, S., Homan, S.	American Journal of Managed Care	2015		Scopus
Improving Dialysis Adherence for High Risk Patients Using Automated Messaging: Proof of Concept	Som A, Groenendyk J, An T, Patel K, Peters R, Polites G, Ross WR.	Sci Rep	2017	10.1038/s41598-017-03184-z	PubMed
Improving Dialysis Adherence for High Risk Patients Using Automated Messaging: Proof of Concept	Som, A., Groenendyk, J., An, T., Patel, K., Peters, R., Polites, G., Ross, W.R.	Scientific Reports	2017	10.1038/s41598-017-03184-z	Scopus
Improving Dialysis Adherence for High Risk Patients Using Automated Messaging: Proof of Concept	Som, A; Groenendyk, J; An, T; Patel, K; Peters, R; Polites, G; Ross, WR	SCIENTIFIC REPORTS	2017	10.1038/s41598-017-03184-z	WOS
Improving emergency gas supply to deep divers.	[No author name available]	OCEAN IND.	1985		Scopus
Improving geriatric care and reducing hospitalisations in regional and remote areas: The benefits of telehealth	Lillicrap L, Hunter C, Goldswain P.	J Telemed Telecare	2021	10.1177/1357633X19881588	PubMed
Improving geriatric care and reducing hospitalisations in regional and remote areas: The benefits of telehealth	Lillicrap, L., Hunter, C., Goldswain, P.	Journal of Telemedicine and Telecare	2021	10.1177/1357633X19881588	Scopus
Improving geriatric care and reducing hospitalisations in regional and remote areas: The benefits of telehealth	Lillicrap, L; Hunter, C; Goldswain, P	JOURNAL OF TELEMEDICINE AND TELECARE	2021	10.1177/1357633X19881588	WOS
Improving Primary Care Delivery for Patients Receiving Maintenance Hemodialysis	Beers KH, Sperati CJ, Weisman DS, Abdel-Kader K, Soman S, Plantinga L, Choi MJ, Jaar BG, Greer RC.	Am J Kidney Dis	2021	10.1053/j.ajkd.2021.02.340	PubMed
Improving Primary Care Delivery for Patients Receiving Maintenance Hemodialysis	Beers, K.H., Sperati, C.J., Weisman, D.S., Abdel-Kader, K., Soman, S., Plantinga, L., Choi, M.J., Jaar, B.G., Greer, R.C.	American Journal of Kidney Diseases	2021	10.1053/j.ajkd.2021.02.340	Scopus
Improving Primary Care Delivery for Patients Receiving Maintenance Hemodialysis	Beers, KH; Sperati, CJ; Weisman, DS; Abdel-Kader, K; Soman, S; Plantinga, L; Choi, MJ; Jaar, BG; Greer, RC	AMERICAN JOURNAL OF KIDNEY DISEASES	2021	10.1053/j.ajkd.2021.02.340	WOS
Improving service user self-management: development and implementation of a strategy for the Richmond Response and Rehabilitation Team	Sanders J, Fitzpatrick JM.	BMJ Open Qual	2017	10.1136/bmjoq-2017-000126	PubMed
Increase in avoidable hospital admissions after the Great East Japan Earthquake	Sasabuchi Y, Matsui H, Yasunaga H, Fushimi K.	J Epidemiol Community Health	2017	10.1136/jech-2016-207413	PubMed
Increase in avoidable hospital admissions after the great east Japan Earthquake	Sasabuchi, Y., Matsui, H., Yasunaga, H., Fushimi, K.	Journal of Epidemiology and Community Health	2017	10.1136/jech-2016-207413	Scopus
Increase in avoidable hospital admissions after the Great East Japan Earthquake	Sasabuchi, Y; Matsui, H; Yasunaga, H; Fushimi, K	JOURNAL OF EPIDEMIOLOGY AND COMMUNITY HEALTH	2017	10.1136/jech-2016-207413	WOS
Increased mortality with undertriaged patients in a mature trauma center with an aggressive trauma team activation system	Rogers A, Rogers FB, Schwab CW, Bradburn E, Lee J, Wu D, Miller JA.	Eur J Trauma Emerg Surg	2013	10.1007/s00068-013-0289-z	PubMed
Increasing the Effectiveness of "Stop the Bleed" Training Through Stepwise Mastery Learning with Deliberate Practice	Muret-Wagstaff SL, Faber DA, Gamboa AC, Lovasik BP.	J Surg Educ	2020	10.1016/j.jsurg.2020.03.001	PubMed
Increasing the Effectiveness of “Stop the Bleed” Training Through Stepwise Mastery Learning with Deliberate Practice	Muret-Wagstaff, S.L., Faber, D.A., Gamboa, A.C., Lovasik, B.P.	Journal of Surgical Education	2020	10.1016/j.jsurg.2020.03.001	Scopus
Increasing the Effectiveness of Stop the Bleed Training Through Stepwise Mastery Learning with Deliberate Practice	Muret-Wagstaff, SL; Faber, DA; Gamboa, AC; Lovasik, BP	JOURNAL OF SURGICAL EDUCATION	2020	10.1016/j.jsurg.2020.03.001	WOS
INDEED-Utilization and Cross-Sectoral Patterns of Care for Patients Admitted to Emergency Departments in Germany: Rationale and Study Design	Fischer-Rosinský A, Slagman A, King R, Reinhold T, Schenk L, Greiner F, von Stillfried D, Zimmermann G, Lüpkes C, Günster C, Baier N, Henschke C, Roll S, Keil T, Möckel M.	Front Public Health	2021	10.3389/fpubh.2021.616857	PubMed
INDEED-Utilization and Cross-Sectoral Patterns of Care for Patients Admitted to Emergency Departments in Germany: Rationale and Study Design	Fischer-Rosinsky, A; Slagman, A; King, R; Reinhold, T; Schenk, L; Greiner, F; von Stillfried, D; Zimmermann, G; Lupkes, C; Gunster, C; Baier, N; Henschke, C; Roll, S; Keil, T; Mockel, M	FRONTIERS IN PUBLIC HEALTH	2021	10.3389/fpubh.2021.616857	WOS
INDEED–Utilization and Cross-Sectoral Patterns of Care for Patients Admitted to Emergency Departments in Germany: Rationale and Study Design	Fischer-Rosinský, A., Slagman, A., King, R., Reinhold, T., Schenk, L., Greiner, F., von Stillfried, D., Zimmermann, G., Lüpkes, C., Günster, C., Baier, N., Henschke, C., Roll, S., Keil, T., Möckel, M.	Frontiers in Public Health	2021	10.3389/fpubh.2021.616857	Scopus
Individual and hospital-related determinants of potentially inappropriate admissions emerging from administrative records	Fusco, M., Buja, A., Piergentili, P., Golfetto, M.T., Serafin, G., Gallo, S., Dalla Barba, L., Baldo, V.	Health Policy	2016	10.1016/j.healthpol.2016.09.015	Scopus
Inequalities in realised access to healthcare among recently arrived refugees depending on local access model: study protocol for a quasi-experimental study	Wenner J, Rolke K, Breckenkamp J, Sauzet O, Bozorgmehr K, Razum O.	BMJ Open	2019	10.1136/bmjopen-2018-027357	PubMed
Inequalities in realised access to healthcare among recently arrived refugees depending on local access model: Study protocol for a quasi-experimental study	Wenner, J., Rolke, K., Breckenkamp, J., Sauzet, O., Bozorgmehr, K., Razum, O.	BMJ Open	2019	10.1136/bmjopen-2018-027357	Scopus
Inequalities in realised access to healthcare among recently arrived refugees depending on local access model: study protocol for a quasi-experimental study	Wenner, J; Rolke, K; Breckenkamp, J; Sauzet, O; Bozorgmehr, K; Razum, O	BMJ OPEN	2019	10.1136/bmjopen-2018-027357	WOS
Inequities in periodontal disease prevalence, preventio n, and management	Mills A, Levin L.	Quintessence Int	2021	10.3290/j.qi.b1763677	PubMed
Infant health outcomes associated with voluntary health care model change in a choice-based Medicaid system	Pittard WB 3rd, Laditka JN, Laditka SB.	South Med J	2009	10.1097/SMJ.0b013e3181acca02	PubMed
Infant health outcomes associated with voluntary health care model change in a choice-based medicaid system	Pittard III, W.B., Laditka, J.N., Laditka, S.B.	Southern Medical Journal	2009	10.1097/SMJ.0b013e3181acca02	Scopus
Infant Health Outcomes Associated with Voluntary Health Care Model Change in a Choice-Based Medicaid System	Pittard, WB; Laditka, JN; Laditka, SB	SOUTHERN MEDICAL JOURNAL	2009	10.1097/SMJ.0b013e3181acca02	WOS
Influencing Factors Associated with Implementation of INTERACT (Interventions to Reduce Acute Care Transfers) in VA Community Living Centers (CLCs) Using the Consolidated Framework	Mochel, A.L., Holle, C.L., Rudolph, J.L., Ouslander, J.G., Saliba, D., Mor, V., Mittman, B.S.	Journal of Aging and Social Policy	2021	10.1080/08959420.2021.1926862	Scopus
Innovative Oncology Care Models Improve End-Of-Life Quality, Reduce Utilization And Spending	Colligan, EM; Ewald, E; Ruiz, S; Spafford, M; Cross-Barnet, C; Parashuram, S	HEALTH AFFAIRS	2017	10.1377/hlthaff.2016.1303	WOS
Inpatient and emergency room visits for adolescents and young adults with spina bifida living in South Carolina	Mann JR, Royer JA, Turk MA, McDermott S, Holland MM, Ozturk OD, Hardin JW, Thibadeau JK.	PM R	2015	10.1016/j.pmrj.2014.11.011	PubMed
Inpatient and Emergency Room Visits for Adolescents and Young Adults With Spina Bifida Living in South Carolina	Mann, J.R., Royer, J.A., Turk, M.A., McDermott, S., Holland, M.M., Ozturk, O.D., Hardin, J.W., Thibadeau, J.K.	PM and R	2015	10.1016/j.pmrj.2014.11.011	Scopus
Inpatient and Emergency Room Visits for Adolescents and Young Adults With Spina Bifida Living in South Carolina	Mann, JR; Royer, JA; Turk, MA; McDermott, S; Holland, MM; Ozturk, OD; Hardin, JW; Thibadeau, JK	PM&R	2015	10.1016/j.pmrj.2014.11.011	WOS
Insights Into the Potential Preventability of Oncology Readmissions	Meisenberg, BR; Hahn, E; Binner, M; Weng, D	JOURNAL OF ONCOLOGY PRACTICE	2016	10.1200/JOP.2015.006437	WOS
InSpire to Promote Lung Assessment in Youth: Evolving the Self-Management Paradigms of Young People With Asthma	Elias P, Rajan NO, McArthur K, Dacso CC.	Med 2 0	2013	10.2196/med20.2014	PubMed
Integrated care pathways for airway diseases (AIRWAYS-ICPs)	European Innovation Partnership on Active and Healthy Ageing, Action Plan B3; Mechanisms of the Development of Allergy, WP 10; Global Alliance against Chronic Respiratory Diseases, Bousquet J, Addis A, Adcock I, Agache I, Agusti A, Alonso A, Annesi-Maesano I, Anto JM, Bachert C, Baena-Cagnani CE, Bai C, Baigenzhin A, Barbara C, Barnes PJ, Bateman ED, Beck L, Bedbrook A, Bel EH, Benezet O, Bennoor…	Eur Respir J	2014	10.1183/09031936.00014614	PubMed
Integrated care pathways for airway diseases (AIRWAYS-ICPs)	Bousquet, J., Addis, A., Adcock, I., Agache, I., Agusti, A., Alonso, A., Annesi-Maesano, I., Anto, J.M., Bachert, C., Baena-Cagnani, C.E., Bai, C., Baigenzhin, A., Barbara, C., Barnes, P.J., Bateman, E.D., Beck, L., Bedbrook, A., Bel, E.H., Benezet, O., Bennoor, K.S., Benson, M., Bernabeu-Wittel, M., Bewick, M., Bindslev-Jensen, C., Blain, H., Blasi, F., Bonini, M., Bonini, S., Boulet, L.P., Bour…	European Respiratory Journal	2014	10.1183/09031936.00014614	Scopus
Integrated care pathways for airway diseases (AIRWAYS-ICPs)	Bousquet, J; Addis, A; Adcock, I; Agache, I; Agusti, A; Alonso, A; Annesi-Maesano, I; Anto, JM; Bachert, C; Baena-Cagnani, CE; Bai, C; Baigenzhin, A; Barbara, C; Barnes, PJ; Bateman, ED; Beck, L; Bedbrook, A; Bel, EH; Benezet, O; Bennoor, KS; Benson, M; Bernabeu-Wittel, M; Bewick, M; Bindslev-Jensen, C; Blain, H; Blasi, F; Bonini, M; Bonini, S; Boulet, LP; Bourdin, A; Bourret, R; Bousquet, PJ; Br…	EUROPEAN RESPIRATORY JOURNAL	2014	10.1183/09031936.00014614	WOS
INTERACT in VA Community Living Centers (CLCs): Training and Implementation Strategies	Mochel, A.L., Henry, N.D., Saliba, D., Phibbs, C.S., Ouslander, J.G., Mor, V.	Geriatric Nursing	2018	10.1016/j.gerinurse.2017.09.002	Scopus
Intervention study on the effect of integrated care on equity in healthcare	Agerholm, J; Burstrom, B; Schon, P; Orsini, N	INTERNATIONAL JOURNAL OF INTEGRATED CARE	2018	10.5334/ijic.s2248	WOS
Interventions to reduce inequalities in avoidable hospital admissions: explanatory framework and systematic review protocol	Sowden S, Nezafat-Maldonado B, Wildman J, Cookson R, Thomson R, Lambert M, Beyer F, Bambra C.	BMJ Open	2020	10.1136/bmjopen-2019-035429	PubMed
Interventions to reduce inequalities in avoidable hospital admissions: Explanatory framework and systematic review protocol	Sowden, S., Nezafat-Maldonado, B., Wildman, J., Cookson, R., Thomson, R., Lambert, M., Beyer, F., Bambra, C.	BMJ Open	2020	10.1136/bmjopen-2019-035429	Scopus
Interventions to reduce inequalities in avoidable hospital admissions: explanatory framework and systematic review protocol	Sowden, S; Nezafat-Maldonado, B; Wildman, J; Cookson, R; Thomson, R; Lambert, M; Beyer, F; Bambra, C	BMJ OPEN	2020	10.1136/bmjopen-2019-035429	WOS
Investigating the causal effect of socioeconomic status on quality of care under a universal health insurance system - a marginal structural model approach	Cho, HE; Wang, L; Chen, JS; Liu, MC; Kuo, CF; Chung, KC	BMC HEALTH SERVICES RESEARCH	2019	10.1186/s12913-019-4793-7	WOS
Investigation of mitochondrial sequence variants associated with aminoglycoside-induced ototoxicity in South African TB patients on aminoglycosides	Human H, Hagen CM, de Jong G, Harris T, Lombard D, Christiansen M, Bardien S.	Biochem Biophys Res Commun	2010	10.1016/j.bbrc.2010.02.075	PubMed
Investigation of mitochondrial sequence variants associated with aminoglycoside-induced ototoxicity in South African TB patients on aminoglycosides	Human, H., Hagen, C.M., Jong, G.d., Harris, T., Lombard, D., Christiansen, M., Bardien, S.	Biochemical and Biophysical Research Communications	2010	10.1016/j.bbrc.2010.02.075	Scopus
Investigation of mitochondrial sequence variants associated with aminoglycoside-induced ototoxicity in South African TB patients on aminoglycosides	Human, H; Hagen, CM; de Jong, G; Harris, T; Lombard, D; Christiansen, M; Bardien, S	BIOCHEMICAL AND BIOPHYSICAL RESEARCH COMMUNICATIONS	2010	10.1016/j.bbrc.2010.02.075	WOS
Is health systems integration being advanced through Local Health District planning?	Saunders C, Carter DJ.	Aust Health Rev	2017	10.1071/AH15191	PubMed
Is health systems integration being advanced through Local Health District planning?	Saunders, C., Carter, D.J.	Australian Health Review	2017	10.1071/AH15191	Scopus
Is health systems integration being advanced through Local Health District planning?	Saunders, C; Carter, DJ	AUSTRALIAN HEALTH REVIEW	2017	10.1071/AH15191	WOS
Is hospitalisation necessary? A survey of frail older persons with cognitive impairment transferred from nursing homes to the emergency department	Björck M, Wijk H.	Scand J Caring Sci	2018	10.1111/scs.12559	PubMed
Is hospitalisation necessary? A survey of frail older persons with cognitive impairment transferred from nursing homes to the emergency department	Björck, M., Wijk, H.	Scandinavian Journal of Caring Sciences	2018	10.1111/scs.12559	Scopus
Is hospitalisation necessary? A survey of frail older persons with cognitive impairment transferred from nursing homes to the emergency department	Bjorck, M; Wijk, H	SCANDINAVIAN JOURNAL OF CARING SCIENCES	2018	10.1111/scs.12559	WOS
Is the emergency department an appropriate substitute for primary care for persons with traumatic spinal cord injury?	Guilcher SJ, Craven BC, Calzavara A, McColl MA, Jaglal SB.	Spinal Cord	2013	10.1038/sc.2012.123	PubMed
Is the emergency department an appropriate substitute for primary care for persons with traumatic spinal cord injury?	Guilcher, S.J.T., Craven, B.C., Calzavara, A., McColl, M.A., Jaglal, S.B.	Spinal Cord	2013	10.1038/sc.2012.123	Scopus
Is the emergency department an appropriate substitute for primary care for persons with traumatic spinal cord injury?	Guilcher, SJT; Craven, BC; Calzavara, A; McColl, MA; Jaglal, SB	SPINAL CORD	2013	10.1038/sc.2012.123	WOS
Is there a Link Between Foreclosure and Health?	Currie J, Tekin E.	Am Econ J Econ Policy	2015	10.1257/pol.20120325	PubMed
Is there a link between foreclosure and health?	Currie, J., Tekin, E.	American Economic Journal: Economic Policy	2015	10.1257/pol.20120325	Scopus
Is There a Link between Foreclosure and Health?	Currie, J; Tekin, E	AMERICAN ECONOMIC JOURNAL-ECONOMIC POLICY	2015	10.1257/pol.20120325	WOS
Keeping Long-Term Care Patients Out of Hospital During Acute Medical Illness: Proposal for Common Elements of an Integrated Healthcare Delivery System for Long-Term Care	Grinman MN, Human T, Shankel MJ, Young A, Pedulla J, Roopani A, Ewa V.	Healthc Q	2019	10.12927/hcq.2019.25906	PubMed
Keeping Long-Term Care Patients Out of Hospital During Acute Medical Illness: Proposal for Common Elements of an Integrated Healthcare Delivery System for Long-Term Care	Grinman, M.N., Human, T., Shankel, M.J., Young, A., Pedulla, J., Roopani, A., Ewa, V.	Healthcare quarterly (Toronto, Ont.)	2019	10.12927/hcq.2019.25906	Scopus
Ketamine Use in Prehospital and Hospital Treatment of the Acute Trauma Patient: A Joint Position Statement	Morgan MM, Perina DG, Acquisto NM, Fallat ME, Gallagher JM, Brown KM, Ho J, Burnett A, Lairet J, Rowe D, Gestring ML.	Prehosp Emerg Care	2021	10.1080/10903127.2020.1801920	PubMed
Knowledge about ischemic stroke in Ecuadorian people [Conocimiento acerca del ictus isquémico en ecuatorianos]	Scherle Matamoros, C.E., Rodríguez, D.R., San José, Á.C., Di Capua Sacoto, D., de los Ángeles Mullo Almache, E., Villalba, M.J.S., Cabezas, V.A.N., Ordóñez, D.C.N.	Revista Ecuatoriana de Neurologia	2018		Scopus
Lessons Learned From Root Cause Analyses of Transfers of Skilled Nursing Facility (SNF) Patients to Acute Hospitals: Transfers Rated as Preventable Versus Nonpreventable by SNF Staff	Ouslander JG, Naharci I, Engstrom G, Shutes J, Wolf DG, Alpert G, Rojido C, Tappen R, Newman D.	J Am Med Dir Assoc	2016	10.1016/j.jamda.2016.02.014	PubMed
Lessons Learned From Root Cause Analyses of Transfers of Skilled Nursing Facility (SNF) Patients to Acute Hospitals: Transfers Rated as Preventable Versus Nonpreventable by SNF Staff	Ouslander, J.G., Naharci, I., Engstrom, G., Shutes, J., Wolf, D.G., Alpert, G., Rojido, C., Tappen, R., Newman, D.	Journal of the American Medical Directors Association	2016	10.1016/j.jamda.2016.02.014	Scopus
Lessons Learned From Root Cause Analyses of Transfers of Skilled Nursing Facility (SNF) Patients to Acute Hospitals: Transfers Rated as Preventable Versus Nonpreventable by SNF Staff	Ouslander, JG; Naharci, I; Engstrom, G; Shutes, J; Wolf, DG; Alpert, G; Rojido, C; Tappen, R; Newman, D	JOURNAL OF THE AMERICAN MEDICAL DIRECTORS ASSOCIATION	2016	10.1016/j.jamda.2016.02.014	WOS
Letter to the editor regarding the joint statement from the American College of Surgeons' Committee on Trauma (ACS-COT) and the American College of Emergency Physicians (ACEP) regarding the clinical use of resuscitative endovascular balloon occlusion of the aorta (REBOA)	DuBose JJ, Rasmussen TE, Davis MR.	Trauma Surg Acute Care Open	2018	10.1136/tsaco-2018-000167	PubMed
Limited English Proficient Patient Visits and Emergency Department Admission Rates for Ambulatory Care Sensitive Conditions in California: a Retrospective Cohort Study	Schulson L, Lin MY, Paasche-Orlow MK, Hanchate AD.	J Gen Intern Med	2021	10.1007/s11606-020-06523-5	PubMed
Limited English Proficient Patient Visits and Emergency Department Admission Rates for Ambulatory Care Sensitive Conditions in California: a Retrospective Cohort Study	Schulson, L., Lin, M.-Y., Paasche-Orlow, M.K., Hanchate, A.D.	Journal of General Internal Medicine	2021	10.1007/s11606-020-06523-5	Scopus
Limited English Proficient Patient Visits and Emergency Department Admission Rates for Ambulatory Care Sensitive Conditions in California: a Retrospective Cohort Study	Schulson, L; Lin, MY; Paasche-Orlow, MK; Hanchate, AD	JOURNAL OF GENERAL INTERNAL MEDICINE	2021	10.1007/s11606-020-06523-5	WOS
LIMITED ENGLISH PROFICIENT PATIENTS AND EMERGENCY ROOM ADMISSION RATES FOR AMBULATORY CARE SENSITIVE CONDITIONS IN CALIFORNIA	Schulson, L; Lin, MY; Paasche-Orlow, MK; Hanchate, AD	JOURNAL OF GENERAL INTERNAL MEDICINE	2020		WOS
Literature Review: Prediction Modeling of Emergency Department Disposition Decisions for Children with Acute Asthma Exacerbations	Patel, S.J., Arnold, D.H., Topoz, I., Sills, M.R.	Clinical Pediatric Emergency Medicine	2018	10.1016/j.cpem.2018.02.012	Scopus
Literature Review: Prediction Modeling of Emergency Department Disposition Decisions for Children with Acute Asthma Exacerbations	Patel, SJ; Arnold, DH; Topoz, I; Sills, MR	CLINICAL PEDIATRIC EMERGENCY MEDICINE	2018	10.1016/j.cpem.2018.02.012	WOS
Long-Stay Nursing Facility Resident Transfers: Who Gets Admitted to the Hospital?	Unroe KT, Caterino JM, Stump TE, Tu W, Carnahan JL, Vest JR, Sachs GA, Hickman SE.	J Am Geriatr Soc	2020	10.1111/jgs.16633	PubMed
Long-Stay Nursing Facility Resident Transfers: Who Gets Admitted to the Hospital?	Unroe, K.T., Caterino, J.M., Stump, T.E., Tu, W., Carnahan, J.L., Vest, J.R., Sachs, G.A., Hickman, S.E.	Journal of the American Geriatrics Society	2020	10.1111/jgs.16633	Scopus
Long-Stay Nursing Facility Resident Transfers: Who Gets Admitted to the Hospital?	Unroe, KT; Caterino, JM; Stump, TE; Tu, WZ; Carnahan, JL; Vest, JR; Sachs, GA; Hickman, SE	JOURNAL OF THE AMERICAN GERIATRICS SOCIETY	2020	10.1111/jgs.16633	WOS
Long-term impact of environmental public health disaster on health system performance: experiences from the Graniteville, South Carolina chlorine spill	Runkle JR, Zhang H, Karmaus W, Brock-Martin A, Svendsen ER.	South Med J	2013	10.1097/SMJ.0b013e31827c54fc	PubMed
Long-Term Impact of Environmental Public Health Disaster on Health System Performance: Experiences from the Graniteville, South Carolina Chlorine Spill	Runkle, JR; Zhang, HM; Karmaus, W; Brock-Martin, A; Svendsen, ER	SOUTHERN MEDICAL JOURNAL	2013	10.1097/SMJ.0b013e31827c54fc	WOS
Long-term impact of environmental public health disaster on health system performance: experiences from the Graniteville, South Carolina chlorine spill.	Runkle, J.R., Zhang, H., Karmaus, W., Brock-Martin, A., Svendsen, E.R.	Southern medical journal	2013		Scopus
Longitudinal Analysis of Opioid Analgesic Dose and Diabetes Quality of Care Measures	Gautam S, Franzini L, Mikhail OI, Chan W, Turner BJ.	Pain Med	2015	10.1111/pme.12835	PubMed
Longitudinal Analysis of Opioid Analgesic Dose and Diabetes Quality of Care Measures	Gautam, S., Franzini, L., Mikhail, O.I., Chan, W., Turner, B.J.	Pain Medicine (United States)	2015	10.1111/pme.12835	Scopus
Longitudinal Analysis of Opioid Analgesic Dose and Diabetes Quality of Care Measures	Gautam, S; Franzini, L; Mikhail, OI; Chan, W; Turner, BJ	PAIN MEDICINE	2015	10.1111/pme.12835	WOS
Management Care for Long-Stay Nursing Home Residents: An Evaluation of Institutional Special Needs Plans	McGarry, BE; Grabowski, DC	AMERICAN JOURNAL OF MANAGED CARE	2019		WOS
Management of Acute Changes in Condition in Skilled Nursing Facilities	Ouslander, JG; Engstrom, G; Reyes, B; Tappen, R; Rojido, C; Gray-Miceli, D	JOURNAL OF THE AMERICAN GERIATRICS SOCIETY	2018	10.1111/jgs.15632	WOS
Management of heatstroke and heat exhaustion	Glazer JL.	Am Fam Physician	2005		PubMed
Management of heatstroke and heat exhaustion	Glazer, J.L.	American Family Physician	2005		Scopus
Management of heatstroke and heat exhaustion	Glazer, JL	AMERICAN FAMILY PHYSICIAN	2005		WOS
Management of Nursing Home Residents Following Acute Hospitalization: Efficacy of the Regular Early Assessment Post-Discharge (REAP) Intervention	Cordato, NJ; Kearns, M; Smerdely, P; Seeher, KM; Gardiner, MD; Brodaty, H	JOURNAL OF THE AMERICAN MEDICAL DIRECTORS ASSOCIATION	2018	10.1016/j.jamda.2017.12.008	WOS
Managing chronic conditions care across primary care and hospital systems: lessons from an Australian Hospital Avoidance Risk Program using the Flinders Chronic Condition Management Program	Lawn S, Zabeen S, Smith D, Wilson E, Miller C, Battersby M, Masman K.	Aust Health Rev	2018	10.1071/AH17099	PubMed
Många över 80 år hade kunnat få vård utanför akutsjukhuset	Myredal, A., Mauritzon, I., Blom, M., Ivarsson, K.	Lakartidningen	2016		Scopus
Many people over 80 years had been able to get care outside the hospital [Många över 80 år hade kunnat få vård utanför sjukhuset]	Myredal, A., Mauritzon, I., Blom, M., Ivarsson, K.	Läkartidningen	2016		Scopus
Measuring Health Equity for Ambulatory Care Sensitive Conditions in a Large Integrated Health Care System: The Development of an Index	Pressman A, Lockhart S, Petersen J, Robinson S, Moreno M, Azar KMJ.	Health Equity	2019	10.1089/heq.2018.0092	PubMed
Measuring Health Equity for Ambulatory Care Sensitive Conditions in a Large Integrated Health Care System: The Development of an Index	Pressman, A., Lockhart, S., Petersen, J., Robinson, S., Moreno, M., Azar, K.M.J.	Health Equity	2019	10.1089/heq.2018.0092	Scopus
Measuring Health Equity for Ambulatory Care Sensitive Conditions in a Large Integrated Health Care System: The Development of an Index	Pressman, A; Lockhart, S; Petersen, J; Robinson, S; Moreno, M; Azar, KMJ	HEALTH EQUITY	2019	10.1089/heq.2018.0092	WOS
Measuring Health Equity in Emergency Care Using Routinely Collected Data: A Systematic Review	Morisod, K; Luta, X; Marti, J; Spycher, J; Malebranche, M; Bodenmann, P	HEALTH EQUITY	2021	10.1089/heq.2021.0035	WOS
Medicaid and Child Health Insurance Program Improve Child Health and Reduce Poverty But Face Threats	Currie J, Chorniy A.	Acad Pediatr	2021	10.1016/j.acap.2021.01.009	PubMed
Medicaid and Child Health Insurance Program Improve Child Health and Reduce Poverty But Face Threats	Currie, J., Chorniy, A.	Academic Pediatrics	2021	10.1016/j.acap.2021.01.009	Scopus
Medicaid Expansion And Preventable Hospitalizations	Figueroa JF, Wadhera RK.	Health Aff (Millwood)	2020	10.1377/hlthaff.2019.01610	PubMed
Medicaid Expansion And Preventable Hospitalizations	Figueroa, J.F., Wadhera, R.K.	Health Affairs	2020	10.1377/hlthaff.2019.01610	Scopus
Medicaid patients seen at federally qualified health centers use hospital services less than those seen by private providers	Rothkopf J, Brookler K, Wadhwa S, Sajovetz M.	Health Aff (Millwood)	2011	10.1377/hlthaff.2011.0066	PubMed
Medicaid patients seen at federally qualified health centers use hospital services less than those seen by private providers	Rothkopf, J., Brookler, K., Wadhwa, S., Sajovetz, M.	Health Affairs	2011	10.1377/hlthaff.2011.0066	Scopus
Medicaid Patients Seen At Federally Qualified Health Centers Use Hospital Services Less Than Those Seen By Private Providers	Rothkopf, J; Brookler, K; Wadhwa, S; Sajovetz, M	HEALTH AFFAIRS	2011	10.1377/hlthaff.2011.0066	WOS
Medicaid-Insured and Uninsured Were More Likely to Have Diabetes Emergency/Urgent Admissions	Fisher, MA; Ma, ZQ	AMERICAN JOURNAL OF MANAGED CARE	2015		WOS
Medical group practice characteristics influencing inappropriate emergency department and avoidable hospitalization rates	Kralewski J, Dowd B, Knutson D, Savage M, Tong J.	J Ambul Care Manage	2013	10.1097/JAC.0b013e3182a33287	PubMed
Medical Group Practice Characteristics Influencing Inappropriate Emergency Department and avoidable hospitalization rates	Kralewski, J., Dowd, B., Knutson, D., Savage, M., Tong, J.	Journal of Ambulatory Care Management	2013	10.1097/JAC.0b013e3182a33287	Scopus
Medical home pilot lowers costs, improves quality and patient/staff experience	Bitton, A.	Journal of Clinical Outcomes Management	2009		Scopus
Medicare Expenditures Associated With Hospital and Emergency Department Use Among Beneficiaries With Dementia	Daras LC, Feng Z, Wiener JM, Kaganova Y.	Inquiry	2017	10.1177/0046958017696757	PubMed
Medicare expenditures associated with hospital and emergency department use among beneficiaries with dementia	Daras, L.C., Feng, Z., Wiener, J.M., Kaganova, Y.	Inquiry (United States)	2017	10.1177/0046958017696757	Scopus
Medicare Expenditures Associated With Hospital and Emergency Department Use Among Beneficiaries With Dementia	Daras, LC; Feng, ZL; Wiener, JM; Kaganova, Y	INQUIRY-THE JOURNAL OF HEALTH CARE ORGANIZATION PROVISION AND FINANCING	2017	10.1177/0046958017696757	WOS
Medication nonadherence, mental health, opioid use, and inpatient and emergency department use in super-utilizers	Surbhi S, Graetz I, Wan JY, Gatwood J, Bailey JE.	Am J Manag Care	2020	10.37765/ajmc.2020.42642	PubMed
Medication nonadherence, mental health, opioid use, and inpatient and emergency department use in super-utilizers	Surbhi, S., Graetz, I., Wan, J.Y., Gatwood, J., Bailey, J.E.	American Journal of Managed Care	2020	10.37765/ajmc.2020.42642	Scopus
Medication Nonadherence, Mental Health, Opioid Use, and Inpatient and Emergency Department Use in Super-Utilizers	Surbhi, S; Graetz, I; Wan, JY; Gatwood, J; Bailey, JE	AMERICAN JOURNAL OF MANAGED CARE	2020	10.37765/ajmc.2020.42642	WOS
Medication Use and Fall-Related Hospital Admissions from Long-Term Care Facilities: A Hospital-Based Case–Control Study	Ryan-Atwood, T.E., Hutchinson-Kern, M., Ilomäki, J., Dooley, M.J., Poole, S.G., Kirkpatrick, C.M., Manias, E., Mitra, B., Bell, J.S.	Drugs and Aging	2017	10.1007/s40266-017-0472-8	Scopus
Methodology of a Cross-sectional Study Evaluating the Impact of a Novel Mobile Care Team on the Prevalence of Ambulatory Care Sensitive Conditions Presenting to Emergency Medical Services	Brown R, Carter A, Goldstein J, Jensen JL, Travers AH.	Cureus	2018	10.7759/cureus.3369	PubMed
Mortality pattern in the Emergency Paediatric Unit of Ahmadu Bello University Teaching Hospital, Zaria, Nigeria	Aikhionbare HA, Yakubu AM, Naida AM.	Cent Afr J Med	1989		PubMed
Mortality pattern in the Emergency Paediatric Unit of Ahmadu Bello University Teaching Hospital, Zaria, Nigeria.	Aikhionbare, H.A., Yakubu, A.M., Naida, A.M.	Central African Journal of Medicine	1989		Scopus
Multimorbidity among People Experiencing Homelessness-Insights from Primary Care Data	Vallesi, S; Tuson, M; Davies, A; Wood, L	INTERNATIONAL JOURNAL OF ENVIRONMENTAL RESEARCH AND PUBLIC HEALTH	2021	10.3390/ijerph18126498	WOS
Multimorbidity combinations, costs of hospital care and potentially preventable emergency admissions in England: A cohort study	Stokes J, Guthrie B, Mercer SW, Rice N, Sutton M.	PLoS Med	2021	10.1371/journal.pmed.1003514	PubMed
Multimorbidity combinations, costs of hospital care and potentially preventable emergency admissions in England: A cohort study	Stokes, J., Guthrie, B., Mercer, S.W., Rice, N., Sutton, M.	PLoS Medicine	2021	10.1371/journal.pmed.1003514	Scopus
Multimorbidity combinations, costs of hospital care and potentially preventable emergency admissions in England: A cohort study	Stokes, J; Guthrie, B; Mercer, SW; Rice, N; Sutton, M	PLOS MEDICINE	2021	10.1371/journal.pmed.1003514	WOS
National trends in visits to physician offices and outpatient clinics for angina 1995 to 2010	Will JC, Loustalot F, Hong Y.	Circ Cardiovasc Qual Outcomes	2014	10.1161/CIRCOUTCOMES.113.000450	PubMed
National Trends in Visits to Physician Offices and Outpatient Clinics for Angina 1995 to 2010	Will, J.C., Loustalot, F., Hong, Y.	Circulation: Cardiovascular Quality and Outcomes	2014	10.1161/CIRCOUTCOMES.113.000450	Scopus
National Trends in Visits to Physician Offices and Outpatient Clinics for Angina 1995 to 2010	Will, JC; Loustalot, F; Hong, YL	CIRCULATION-CARDIOVASCULAR QUALITY AND OUTCOMES	2014	10.1161/CIRCOUTCOMES.113.000450	WOS
Navigating an American College of Surgeons Virtual Verification Review Committee Visit: A Health System Perspective	Marden E, Christopherson N.	J Trauma Nurs	2021	10.1097/JTN.0000000000000619	PubMed
Neighborhood Child Opportunity and Individual-Level Pediatric Acute Care Use and Diagnoses	Kersten EE, Adler NE, Gottlieb L, Jutte DP, Robinson S, Roundfield K, LeWinn KZ.	Pediatrics	2018	10.1542/peds.2017-2309	PubMed
Neighborhood child opportunity and individual-level pediatric acute care use and diagnoses	Kersten, E.E., Adler, N.E., Gottlieb, L., Jutte, D.P., Robinson, S., Roundfield, K., LeWinn, K.Z.	Pediatrics	2018	10.1542/peds.2017-2309	Scopus
Neighborhood Child Opportunity and Individual-Level Pediatric Acute Care Use and Diagnoses	Kersten, EE; Adler, NE; Gottlieb, L; Jutte, DP; Robinson, S; Roundfield, K; LeWinn, KZ	PEDIATRICS	2018	10.1542/peds.2017-2309	WOS
Neighborhood clinics: An academic medical center-community health center partnership	Silberberg, M., Yarnall, K.S.H., Johnson, F., Sangvai, D., Patel, R., Yaggy, S.D.	Free Clinics: Local Responses to Health Care Needs	2013		Scopus
Neighborhood socioeconomic characteristics, healthcare spatial access, and emergency department visits for ambulatory care sensitive conditions for elderly	Huang Y, Meyer P, Jin L.	Prev Med Rep	2018	10.1016/j.pmedr.2018.08.015	PubMed
Neighborhood socioeconomic characteristics, healthcare spatial access, and emergency department visits for ambulatory care sensitive conditions for elderly	Huang, Y., Meyer, P., Jin, L.	Preventive Medicine Reports	2018	10.1016/j.pmedr.2018.08.015	Scopus
Neighborhood socioeconomic characteristics, healthcare spatial access, and emergency department visits for ambulatory care sensitive conditions for elderly (vol 12, pg 101, 2018)	Chrisinger, BW	PREVENTIVE MEDICINE REPORTS	2020		WOS
Neighborhood-level Social Determinants of Health Improve Prediction of Preventable Hospitalization and Emergency Department Visits Beyond Claims History	Chi W, Andreyeva E, Zhang Y, Kaushal R, Haynes K.	Popul Health Manag	2021	10.1089/pop.2021.0047	PubMed
Neighborhood-level Social Determinants of Health Improve Prediction of Preventable Hospitalization and Emergency Department Visits Beyond Claims History	Chi, W; Andreyeva, E; Zhang, YK; Kaushal, R; Haynes, K	POPULATION HEALTH MANAGEMENT		10.1089/pop.2021.0047	WOS
Neonatal Umbilical Myiasis-A Rare Case Report	Kumar, S; Dalal, P; Neha; Singla, A	JOURNAL OF CLINICAL AND DIAGNOSTIC RESEARCH	2021	10.7860/JCDR/2021/45427.14700	WOS
Nevada’s medicaid expansion and admissions for ambulatory care–sensitive conditions	Mazurenko, O., Shen, J., Shan, G., Greenway, J.	American Journal of Managed Care	2018		Scopus
New approaches to measuring the comprehensiveness of primary care physicians	O'Malley AS, Rich EC, Shang L, Rose T, Ghosh A, Poznyak D, Peikes D.	Health Serv Res	2019	10.1111/1475-6773.13101	PubMed
New approaches to measuring the comprehensiveness of primary care physicians	O'Malley, A.S., Rich, E.C., Shang, L., Rose, T., Ghosh, A., Poznyak, D., Peikes, D.	Health Services Research	2019	10.1111/1475-6773.13101	Scopus
New approaches to measuring the comprehensiveness of primary care physicians	O'Malley, AS; Rich, EC; Shang, L; Rose, T; Ghosh, A; Poznyak, D; Peikes, D	HEALTH SERVICES RESEARCH	2019	10.1111/1475-6773.13101	WOS
No medicine is sometimes the best medicine	Wallis KA.	BMJ Case Rep	2015	10.1136/bcr-2014-207152	PubMed
No medicine is sometimes the best medicine	Wallis, K.A.	BMJ Case Reports	2015	10.1136/bcr-2014-207152	Scopus
No-shows to primary care appointments: subsequent acute care utilization among diabetic patients	Nuti, LA; Lawley, M; Turkcan, A; Tian, ZY; Zhang, LS; Chang, KR; Willis, DR; Sands, LP	BMC HEALTH SERVICES RESEARCH	2012	10.1186/1472-6963-12-304	WOS
Noncompliance with American College of Surgeons Committee on Trauma recommended criteria for full trauma team activation is associated with undertriage deaths	Tignanelli CJ, Vander Kolk WE, Mikhail JN, Delano MJ, Hemmila MR.	J Trauma Acute Care Surg	2018	10.1097/TA.0000000000001745	PubMed
Nurse practitioner independence, health care utilization, and health outcomes	Traczynski J, Udalova V.	J Health Econ	2018	10.1016/j.jhealeco.2018.01.001	PubMed
Nurse practitioner independence, health care utilization, and health outcomes	Traczynski, J., Udalova, V.	Journal of Health Economics	2018	10.1016/j.jhealeco.2018.01.001	Scopus
Nurse practitioner independence, health care utilization, and health outcomes	Traczynski, J; Udalova, V	JOURNAL OF HEALTH ECONOMICS	2018	10.1016/j.jhealeco.2018.01.001	WOS
Nurse-led multidisciplinary initiatives to improve outcomes and reduce hospital admissions for older adults: The Care coordination through Emergency Department, Residential Aged Care and Primary Health Collaboration project	Marsden, E; Craswell, A; Taylor, A; Coates, K; Crilly, J; Broadbent, M; Glenwright, A; Johnston, C; Wallis, M	AUSTRALASIAN JOURNAL ON AGEING	2018	10.1111/ajag.12526	WOS
Nursing Home Compare Star Rankings and the Variation in Potentially Preventable Emergency Department Visits and Hospital Admissions	Fuller RL, Goldfield NI, Hughes JS, McCullough EC.	Popul Health Manag	2019	10.1089/pop.2018.0065	PubMed
Nursing Home Compare Star Rankings and the Variation in Potentially Preventable Emergency Department Visits and Hospital Admissions	Fuller, R.L., Goldfield, N.I., Hughes, J.S., McCullough, E.C.	Population Health Management	2019	10.1089/pop.2018.0065	Scopus
Nursing Home Compare Star Rankings and the Variation in Potentially Preventable Emergency Department Visits and Hospital Admissions	Fuller, RL; Goldfield, NI; Hughes, JS; McCullough, EC	POPULATION HEALTH MANAGEMENT	2019	10.1089/pop.2018.0065	WOS
Nursing home nurses' perceptions of emergency transfers from nursing homes to hospital: A review of qualitative studies using systematic methods	O'Neill B, Parkinson L, Dwyer T, Reid-Searl K.	Geriatr Nurs	2015	10.1016/j.gerinurse.2015.06.001	PubMed
Nursing home nurses' perceptions of emergency transfers from nursing homes to hospital: A review of qualitative studies using systematic methods	O'Neill, B., Parkinson, L., Dwyer, T., Reid-Searl, K.	Geriatric Nursing	2015	10.1016/j.gerinurse.2015.06.001	Scopus
Nursing home nurses' perceptions of emergency transfers from nursing homes to hospital: A review of qualitative studies using systematic methods	O'Neill, B; Parkinson, L; Dwyer, T; Reid-Sean, K	GERIATRIC NURSING	2015	10.1016/j.gerinurse.2015.06.001	WOS
Nursing home performance in a trial to reduce hospitalizations: Implications for future trials	Ouslander JG, Reyes B, Yang Z, Engstrom G, Tappen R, Newman D, Huckfeldt PJ.	J Am Geriatr Soc	2021	10.1111/jgs.17231	PubMed
Nursing home performance in a trial to reduce hospitalizations: Implications for future trials	Ouslander, J.G., Reyes, B., Yang, Z., Engstrom, G., Tappen, R., Newman, D., Huckfeldt, P.J.	Journal of the American Geriatrics Society	2021	10.1111/jgs.17231	Scopus
Nursing home performance in a trial to reduce hospitalizations: Implications for future trials	Ouslander, JG; Reyes, B; Yang, ZY; Engstrom, G; Tappen, R; Newman, D; Huckfeldt, PJ	JOURNAL OF THE AMERICAN GERIATRICS SOCIETY	2021	10.1111/jgs.17231	WOS
Nursing Home Provider Perceptions of Telemedicine for Reducing Potentially Avoidable Hospitalizations	Driessen J, Bonhomme A, Chang W, Nace DA, Kavalieratos D, Perera S, Handler SM.	J Am Med Dir Assoc	2016	10.1016/j.jamda.2016.02.004	PubMed
Nursing Home Provider Perceptions of Telemedicine for Reducing Potentially Avoidable Hospitalizations	Driessen, J., Bonhomme, A., Chang, W., Nace, D.A., Kavalieratos, D., Perera, S., Handler, S.M.	Journal of the American Medical Directors Association	2016	10.1016/j.jamda.2016.02.004	Scopus
Nursing Home Provider Perceptions of Telemedicine for Reducing Potentially Avoidable Hospitalizations	Driessen, J; Bonhomme, A; Chang, W; Nace, DA; Kavalieratos, D; Perera, S; Handler, SM	JOURNAL OF THE AMERICAN MEDICAL DIRECTORS ASSOCIATION	2016	10.1016/j.jamda.2016.02.004	WOS
Nursing Home Resident, Family, and Staff Perspectives on Hospital Transfers for End-of-Life Care	Sopcheck J, Tappen RM.	Omega (Westport)	2021	10.1177/0030222821997708	PubMed
Nursing Home Resident, Family, and Staff Perspectives on Hospital Transfers for End-of-Life Care	Sopcheck, J., Tappen, R.M.	Omega (United States)	2021	10.1177/0030222821997708	Scopus
Nursing Home Resident, Family, and Staff Perspectives on Hospital Transfers for End-of-Life Care	Sopcheck, J; Tappen, RM	OMEGA-JOURNAL OF DEATH AND DYING		10.1177/0030222821997708	WOS
Nursing Home Transfers for Behavioral Concerns: Findings from the OPTIMISTIC Demonstration Project	Hathaway, EE; Carnahan, JL; Unroe, KT; Stump, TE; Phillips, EO; Hickman, SE; Fowler, NR; Sachs, GA; Bateman, DR	JOURNAL OF THE AMERICAN GERIATRICS SOCIETY	2021	10.1111/jgs.16920	WOS
Nursing staff intentions towards managing deteriorating health in nursing homes: A convergent parallel mixed-methods study using the theory of planned behaviour	O'Neill, BJ; Dwyer, T; Reid-Searl, K; Parkinson, L	JOURNAL OF CLINICAL NURSING	2018	10.1111/jocn.14119	WOS
Obstetric hemorrhage: Anesthetic implications and management	Ghodki, P.S., Sardesai, S.P.	Anaesthesia, Pain and Intensive Care	2014		Scopus
Occupational back pain - An unhelpful polemic	Frank, J.W., Pulcins, I.R., Kerr, M.S., Shannon, H.S., Stansfeld, S.A.	Scandinavian Journal of Work, Environment and Health	1995	10.5271/sjweh.2	Scopus
OCCUPATIONAL BACK PAIN - AN UNHELPFUL POLEMIC	FRANK, JW; PULCINS, IR; KERR, MS; SHANNON, HS; STANSFELD, SA	SCANDINAVIAN JOURNAL OF WORK ENVIRONMENT & HEALTH	1995	10.5271/sjweh.2	WOS
Occupational back pain--an unhelpful polemic	Frank JW, Pulcins IR, Kerr MS, Shannon HS, Stansfeld SA.	Scand J Work Environ Health	1995	10.5271/sjweh.2	PubMed
Odorless inhalant toxic encephalopathy in developing countries household: Gas geyser syndrome	Mehta A, Mahale R, John AA, Abbas MM, Javali M, Acharya P, Rangasetty S.	J Neurosci Rural Pract	2016	10.4103/0976-3147.178656	PubMed
Odorless inhalant toxic encephalopathy in developing countries household: Gas geyser syndrome	Mehta, A., Mahale, R., John, A.A., Abbas, M.M., Javali, M., Acharya, P., Rangasetty, S.	Journal of Neurosciences in Rural Practice	2016	10.4103/0976-3147.178656	Scopus
Odorless inhalant toxic encephalopathy in developing countries household: Gas geyser syndrome	Mehta, A; Mahale, R; John, AA; Abbas, MM; Javali, M; Acharya, P; Rangasetty, S	JOURNAL OF NEUROSCIENCES IN RURAL PRACTICE	2016	10.4103/0976-3147.178656	WOS
Older adult visits to the emergency department for ambulatory care sensitive conditions	Lesser A, Israni J, Lo AX, Ko KJ.	J Am Coll Emerg Physicians Open	2020	10.1002/emp2.12164	PubMed
Older adult visits to the emergency department for ambulatory care sensitive conditions	Lesser, A; Israni, J; Lo, AX; Ko, KJ	JOURNAL OF THE AMERICAN COLLEGE OF EMERGENCY PHYSICIANS OPEN	2020	10.1002/emp2.12164	WOS
Older adults inpatient and emergency department utilization for ambulatory-care-sensitive conditions: Relationship with alcohol consumption	Merrick, E.S.L., Hodgkin, D., Garnick, D.W., Horgan, C.M., Panas, L., Ryan, M., Blow, F.C., Saitz, R.	Journal of Aging and Health	2011	10.1177/0898264310383156	Scopus
Older adults' inpatient and emergency department utilization for ambulatory-care-sensitive conditions: relationship with alcohol consumption	Merrick ES, Hodgkin D, Garnick DW, Horgan CM, Panas L, Ryan M, Blow FC, Saitz R.	J Aging Health	2011	10.1177/0898264310383156	PubMed
Older Adults' Inpatient and Emergency Department Utilization for Ambulatory-Care-Sensitive Conditions: Relationship With Alcohol Consumption	Merrick, ESL; Hodgkin, D; Garnick, DW; Horgan, CM; Panas, L; Ryan, M; Blow, FC; Saitz, R	JOURNAL OF AGING AND HEALTH	2011	10.1177/0898264310383156	WOS
One-Year Outcomes of Diabetes Self-Management Training Among Medicare Beneficiaries Newly Diagnosed With Diabetes	Strawbridge LM, Lloyd JT, Meadow A, Riley GF, Howell BL.	Med Care	2017	10.1097/MLR.0000000000000653	PubMed
One-Year outcomes of diabetes self-management training among medicare beneficiaries newly diagnosed with diabetes	Strawbridge, L.M., Lloyd, J.T., Meadow, A., Riley, G.F., Howell, B.L.	Medical Care	2017	10.1097/MLR.0000000000000653	Scopus
One-Year Outcomes of Diabetes Self-Management Training Among Medicare Beneficiaries Newly Diagnosed With Diabetes	Strawbridge, LM; Lloyd, JT; Meadow, A; Riley, GF; Howell, BL	MEDICAL CARE	2017	10.1097/MLR.0000000000000653	WOS
Optimizing medicine use for people who are homebound: an evaluation of a pilot domiciliary Medicine Use Review (dMUR) service in England	Latif A, Mandane B, Anderson E, Barraclough C, Travis S.	Integr Pharm Res Pract	2018	10.2147/IPRP.S160149	PubMed
Optimizing medicine use for people who are homebound: an evaluation of a pilot domiciliary Medicine Use Review (dMUR) service in England	Latif, A; Mandane, B; Anderson, E; Barraclough, C; Travis, S	INTEGRATED PHARMACY RESEARCH AND PRACTICE	2018	10.2147/IPRP.S160149	WOS
Ordinary kriging - and cokriging - based surrogate model for ionospheric TEC prediction using NavIC/GPS data	Mukesh, R., Karthikeyan, V., Soma, P., Sindhu, P.	Acta Geophysica	2020	10.1007/s11600-020-00473-6	Scopus
Ordinary kriging - and cokriging - based surrogate model for ionospheric TEC prediction using NavIC/GPS data	Mukesh, R; Karthikeyan, V; Soma, P; Sindhu, P	ACTA GEOPHYSICA	2020	10.1007/s11600-020-00473-6	WOS
Organizational interventions improving access to community-based primary health care for vulnerable populations: a scoping review	Khanassov V, Pluye P, Descoteaux S, Haggerty JL, Russell G, Gunn J, Levesque JF.	Int J Equity Health	2016	10.1186/s12939-016-0459-9	PubMed
Organizational interventions improving access to community-based primary health care for vulnerable populations: a scoping review	Khanassov, V., Pluye, P., Descoteaux, S., Haggerty, J.L., Russell, G., Gunn, J., Levesque, J.-F.	International Journal for Equity in Health	2016	10.1186/s12939-016-0459-9	Scopus
Organizational interventions improving access to community-based primary health care for vulnerable populations: a scoping review	Khanassov, V; Pluye, P; Descoteaux, S; Haggerty, JL; Russell, G; Gunn, J; Levesque, JF	INTERNATIONAL JOURNAL FOR EQUITY IN HEALTH	2016	10.1186/s12939-016-0459-9	WOS
Outpatient emergency treatment of nursing home residents. Analysis of insurance claims data	Seeger, I; Ramos, AL; Hoffmann, F	ZEITSCHRIFT FUR GERONTOLOGIE UND GERIATRIE	2018	10.1007/s00391-017-1293-4	WOS
Outpatient Visits Before Ambulatory Care–Sensitive Hospitalization of Children Receiving Medicaid	deJong, N.A., Richardson, T., Chandler, N., Steiner, M.J., Hall, M., Berry, J.	Academic Pediatrics	2018	10.1016/j.acap.2017.09.015	Scopus
Overlooked and underserved in Harlem: a population-based survey of adults with asthma	Northridge ME, Meyer IH, Dunn L.	Environ Health Perspect	2002	10.1289/ehp.02110s2217	PubMed
Overlooked and underserved in Harlem: A population-based survey of adults with asthma	Northridge, M.E., Meyer, I.H., Dunn, L.	Environmental Health Perspectives	2002	10.1289/ehp.02110s2217	Scopus
Overlooked and Underserved in Harlem: A population-based survey of adults with asthma	Northridge, ME; Meyer, IH; Dunn, L	ENVIRONMENTAL HEALTH PERSPECTIVES	2002	10.1289/ehp.02110s2217	WOS
PACE-IT study protocol: a stepped wedge cluster randomised controlled trial evaluating the implementation of telehealth visual assessment in emergency care for people living in residential aged-care facilities	Sunner, C; Giles, MT; Parker, V; Dilworth, S; Bantawa, K; Kable, A; Oldmeadow, C; Foureur, M	BMC HEALTH SERVICES RESEARCH	2020	10.1186/s12913-020-05539-1	WOS
Paediatric hospital admission processes and outcomes: a qualitative study of parents' experiences and priorities	Leyenaar JK, Rizzo PA, O'Brien ER, Lindenauer PK.	BMJ Qual Saf	2018	10.1136/bmjqs-2017-007442	PubMed
Paediatric hospital admission processes and outcomes: A qualitative study of parents' experiences and priorities	Leyenaar, J.K., Rizzo, P.A., O'Brien, E.R., Lindenauer, P.K.	BMJ Quality and Safety	2018	10.1136/bmjqs-2017-007442	Scopus
Paediatric hospital admission processes and outcomes: a qualitative study of parents' experiences and priorities	Leyenaar, JK; Rizzo, PA; O'Brien, ER; Lindenauer, PK	BMJ QUALITY & SAFETY	2018	10.1136/bmjqs-2017-007442	WOS
Pain management in adults with sickle cell disease in a medical center emergency department	Solomon LR.	J Natl Med Assoc	2010	10.1016/s0027-9684(15)30729-x	PubMed
Pain management in adults with sickle cell disease in a Medical Center Emergency Department	Solomon, L.R.	Journal of the National Medical Association	2010	10.1016/S0027-9684(15)30729-X	Scopus
Pain Management in Adults With Sickle Cell Disease in a Medical Center Emergency Department	Solomon, LR	JOURNAL OF THE NATIONAL MEDICAL ASSOCIATION	2010	10.1016/S0027-9684(15)30729-X	WOS
Palliative and end-of-life care in care homes: Protocol for codesigning and implementing an appropriate scalable model of Needs Rounds in the UK	MacGregor, A., Rutherford, A., McCormack, B., Hockley, J., Ogden, M., Soulsby, I., McKenzie, M., Spilsbury, K., Hanratty, B., Forbat, L.	BMJ Open	2021	10.1136/bmjopen-2021-049486	Scopus
Paramedics delivering palliative and end-of-life care in community-based settings: A systematic integrative review with thematic synthesis	Juhrmann ML, Vandersman P, Butow PN, Clayton JM.	Palliat Med	2021	10.1177/02692163211059342	PubMed
Paramedics delivering palliative and end-of-life care in community-based settings: A systematic integrative review with thematic synthesis	Juhrmann, M.L., Vandersman, P., Butow, P.N., Clayton, J.M.	Palliative Medicine	2021	10.1177/02692163211059342	Scopus
Paramedics delivering palliative and end-of-life care in community-based settings: A systematic integrative review with thematic synthesis	Juhrmann, ML; Vandersman, P; Butow, PN; Clayton, JM	PALLIATIVE MEDICINE		10.1177/02692163211059342	WOS
Paramedics' Perspectives on the Hospital Transfers of Nursing Home Residents-A Qualitative Focus Group Study	Pulst, A; Fassmer, AM; Hoffmann, F; Schmiemann, G	INTERNATIONAL JOURNAL OF ENVIRONMENTAL RESEARCH AND PUBLIC HEALTH	2020	10.3390/ijerph17113778	WOS
Parental mental and pain-related health and pediatric ambulatory care sensitive emergency department visits and hospitalizations	Logan, J.E., Riley, A.W., Barker, L.E.	Health Services Research	2008	10.1111/j.1475-6773.2007.00790.x	Scopus
Parental mental and pain-related health and pediatric ambulatory care sensitive emergency department visits and hospitalizations	Logan, JE; Riley, AW; Barker, LE	HEALTH SERVICES RESEARCH	2008	10.1111/j.1475-6773.2007.00790.x	WOS
Patient characteristics and trends in nontraumatic dental condition visits to emergency departments in the United States	Okunseri C, Okunseri E, Thorpe JM, Xiang Q, Szabo A.	Clin Cosmet Investig Dent	2012	10.2147/CCIDEN.S28168	PubMed
Patient characteristics and trends in nontraumatic dental condition visits to emergency departments in the United States	Okunseri, C., Okunseri, E., Thorpe, J.M., Xiang, Q., Szabo, A.	Clinical, Cosmetic and Investigational Dentistry	2012	10.2147/ccide.s28168	Scopus
Patient related factors in frequent readmissions: the influence of condition, access to services and patient choice	Kirby SE, Dennis SM, Jayasinghe UW, Harris MF.	BMC Health Serv Res	2010	10.1186/1472-6963-10-216	PubMed
Patient related factors in frequent readmissions: The influence of condition, access to services and patient choice	Kirby, S.E., Dennis, S.M., Jayasinghe, U.W., Harris, M.F.	BMC Health Services Research	2010	10.1186/1472-6963-10-216	Scopus
Patient related factors in frequent readmissions: the influence of condition, access to services and patient choice	Kirby, SE; Dennis, SM; Jayasinghe, UW; Harris, MF	BMC HEALTH SERVICES RESEARCH	2010	10.1186/1472-6963-10-216	WOS
Patient Transfer Decision Difficulty Scale: Development and psychometric testing of emergency department visits by long-term care residents	Chen, BA; Chien, HH; Chen, CC; Chen, HT; Jeng, C	PLOS ONE	2019	10.1371/journal.pone.0210946	WOS
Patient-Reported Access in the Patient-Centered Medical Home and Avoidable Hospitalizations: an Observational Analysis of the Veterans Health Administration	Augustine, MR; Nelson, KM; Fihn, SD; Wong, ES	JOURNAL OF GENERAL INTERNAL MEDICINE	2019	10.1007/s11606-019-05060-0	WOS
Patients with complex chronic conditions: Health care use and clinical events associated with access to a patient portal	Reed ME, Huang J, Brand RJ, Neugebauer R, Graetz I, Hsu J, Ballard DW, Grant R.	PLoS One	2019	10.1371/journal.pone.0217636	PubMed
Patients with complex chronic conditions: Health care use and clinical events associated with access to a patient portal	Reed, M.E., Huang, J., Brand, R.J., Neugebauer, R., Graetz, I., Hsu, J., Ballard, D.W., Grant, R.	PLoS ONE	2019	10.1371/journal.pone.0217636	Scopus
Patients with complex chronic conditions: Health care use and clinical events associated with access to a patient portal	Reed, ME; Huang, J; Brand, RJ; Neugebauer, R; Graetz, I; Hsu, J; Ballard, DW; Grant, R	PLOS ONE	2019	10.1371/journal.pone.0217636	WOS
Patterns of emergency admissions for ambulatory care sensitive conditions: a spatial cross-sectional analysis of observational data	Santos R, Rice N, Gravelle H.	BMJ Open	2020	10.1136/bmjopen-2020-039910	PubMed
Patterns of emergency admissions for ambulatory care sensitive conditions: A spatial cross-sectional analysis of observational data	Santos, R., Rice, N., Gravelle, H.	BMJ Open	2020	10.1136/bmjopen-2020-039910	Scopus
Patterns of emergency admissions for ambulatory care sensitive conditions: a spatial cross-sectional analysis of observational data	Santos, R; Rice, N; Gravelle, H	BMJ OPEN	2020	10.1136/bmjopen-2020-039910	WOS
PATTERNS OF HEALTHCARE ENCOUNTERS EXPERIENCED BY PATIENTS WITH CHRONIC KIDNEY DISEASE	Welch JL, Meek J, Bartlett Ellis RJ, Ambuehl R, Decker BS.	J Ren Care	2017	10.1111/jorc.12200	PubMed
PATTERNS OF HEALTHCARE ENCOUNTERS EXPERIENCED BY PATIENTS WITH CHRONIC KIDNEY DISEASE	Welch, J.L., Meek, J., Bartlett Ellis, R.J., Ambuehl, R., Decker, B.S.	Journal of Renal Care	2017	10.1111/jorc.12200	Scopus
PATTERNS OF HEALTHCARE ENCOUNTERS EXPERIENCED BY PATIENTS WITH CHRONIC KIDNEY DISEASE	Welch, JL; Meek, J; Ellis, RJB; Ambuehl, R; Decker, BS	JOURNAL OF RENAL CARE	2017	10.1111/jorc.12200	WOS
Patterns of utilization for the Minnesota senior health options program	Kane RL, Homyak P, Bershadsky B, Flood S, Zhang H.	J Am Geriatr Soc	2004	10.1111/j.1532-5415.2004.52558.x	PubMed
Patterns of utilization for the Minnesota Senior Health Options program	Kane, R.L., Homyak, P., Bershadsky, B., Flood, S., Zhang, H.	Journal of the American Geriatrics Society	2004	10.1111/j.1532-5415.2004.52558.x	Scopus
Patterns of utilization for the Minnesota Senior Health Options program	Kane, RL; Homyak, P; Bershadsky, B; Flood, S; Zhang, H	JOURNAL OF THE AMERICAN GERIATRICS SOCIETY	2004	10.1111/j.1532-5415.2004.52558.x	WOS
Performance variations of general practitioners in relation to joint practices [Variazioni delle performance dei Mmg in relazione dalle forme associative]	Mannino, S., Villa, M., Lucchi, S., Brunelli, G., Locatelli, G.W., Zenoni, S., Longo, F.	Mecosan	2009		Scopus
Performing Through Privatization: An Ecological Natural Experiment of the Impact of the Swedish Free Choice Reform on Ambulatory Care Sensitive Conditions	Mosquera PA, San Sebastian M, Burström B, Hurtig AK, Gustafsson PE.	Front Public Health	2021	10.3389/fpubh.2021.504998	PubMed
Performing Through Privatization: An Ecological Natural Experiment of the Impact of the Swedish Free Choice Reform on Ambulatory Care Sensitive Conditions	Mosquera, P.A., San Sebastian, M., Burström, B., Hurtig, A.-K., Gustafsson, P.E.	Frontiers in Public Health	2021	10.3389/fpubh.2021.504998	Scopus
Performing Through Privatization: An Ecological Natural Experiment of the Impact of the Swedish Free Choice Reform on Ambulatory Care Sensitive Conditions	Mosquera, PA; San Sebastian, M; Burstrom, B; Hurtig, AK; Gustafsson, PE	FRONTIERS IN PUBLIC HEALTH	2021	10.3389/fpubh.2021.504998	WOS
Physician Availability in Long-Term Care and Resident Hospital Transfer: A Retrospective Cohort Study	Kobewka, DM; Kunkel, E; Hsu, A; Talarico, R; Tanuseputro, P	JOURNAL OF THE AMERICAN MEDICAL DIRECTORS ASSOCIATION	2020	10.1016/j.jamda.2019.06.004	WOS
Physician Participation in Meaningful Use and Quality of Care for Medicare Fee-for-Service Enrollees	Jung HY, Unruh MA, Vest JR, Casalino LP, Kern LM, Grinspan ZM, Bao Y, Kaushal R; HITEC Investigators.	J Am Geriatr Soc	2017	10.1111/jgs.14704	PubMed
Physician Participation in Meaningful Use and Quality of Care for Medicare Fee-for-Service Enrollees	Jung, H.-Y., Unruh, M.A., Vest, J.R., Casalino, L.P., Kern, L.M., Grinspan, Z.M., Bao, Y., Kaushal, R.	Journal of the American Geriatrics Society	2017	10.1111/jgs.14704	Scopus
Physician Participation in Meaningful Use and Quality of Care for Medicare Fee-for-Service Enrollees	Jung, HY; Unruh, MA; Vest, JR; Casalino, LP; Kern, LM; Grinspan, ZM; Bao, YH; Kaushal, R	JOURNAL OF THE AMERICAN GERIATRICS SOCIETY	2017	10.1111/jgs.14704	WOS
Physicians in nursing homes: effectiveness of physician accountability and communication	Lima JC, Intrator O, Wetle T.	J Am Med Dir Assoc	2015	10.1016/j.jamda.2015.02.018	PubMed
Physicians in Nursing Homes: Effectiveness of Physician Accountability and Communication	Lima, J.C., Intrator, O., Wetle, T.	Journal of the American Medical Directors Association	2015	10.1016/j.jamda.2015.02.018	Scopus
Physicians in Nursing Homes: Effectiveness of Physician Accountability and Communication	Lima, JC; Intrator, O; Wetle, T	JOURNAL OF THE AMERICAN MEDICAL DIRECTORS ASSOCIATION	2015	10.1016/j.jamda.2015.02.018	WOS
Pilot cluster randomised trial of an evidence-based intervention to reduce avoidable hospital admissions in nursing home residents (Better Health in Residents of Care Homes with Nursing - BHiRCH-NH Study)	Sampson, E.L., Feast, A., Blighe, A., Froggatt, K., Hunter, R., Marston, L., McCormack, B., Nurock, S., Panca, M., Powell, C., Rait, G., Robinson, L., Woodward-Carlton, B., Young, J., Downs, M.	BMJ Open	2020	10.1136/bmjopen-2020-040732	Scopus
Pilot cluster randomised trial of an evidence-based intervention to reduce avoidable hospital admissions in nursing home residents (Better Health in Residents of Care Homes with Nursing-BHiRCH-NH Study)	Sampson EL, Feast A, Blighe A, Froggatt K, Hunter R, Marston L, McCormack B, Nurock S, Panca M, Powell C, Rait G, Robinson L, Woodward-Carlton B, Young J, Downs M.	BMJ Open	2020	10.1136/bmjopen-2020-040732	PubMed
Pilot cluster randomised trial of an evidence-based intervention to reduce avoidable hospital admissions in nursing home residents (Better Health in Residents of Care Homes with Nursing-BHiRCH-NH Study)	Sampson, EL; Feast, A; Blighe, A; Froggatt, K; Hunter, R; Marston, L; McCormack, B; Nurock, S; Panca, M; Powell, C; Rait, G; Robinson, L; Woodward-Carlton, B; Young, J; Downs, M	BMJ OPEN	2020	10.1136/bmjopen-2020-040732	WOS
Population-Tailored care for homeless veterans and acute care use, cost, and satisfaction: A prospective quasi- experimental trial	O'Toole, T.P., Johnson, E.E., Borgia, M., Noack, A., Yoon, J., Gehlert, E., Lo, J.	Preventing Chronic Disease	2018	10.5888/pcd15.170311	Scopus
Population-Tailored Care for Homeless Veterans and Acute Care Use, Cost, and Satisfaction: A Prospective Quasi-Experimental Trial	O'Toole TP, Johnson EE, Borgia M, Noack A, Yoon J, Gehlert E, Lo J.	Prev Chronic Dis	2018	10.5888/pcd15.170311	PubMed
Population-Tailored Care for Homeless Veterans and Acute Care Use, Cost, and Satisfaction: A Prospective Quasi-Experimental Trial	O'Toole, TP; Johnson, EE; Borgia, M; Noack, A; Yoon, J; Gehlert, E; Lo, J	PREVENTING CHRONIC DISEASE	2018	10.5888/pcd15.170311	WOS
Potentially avoidable hospitalisation for constipation in Victoria, Australia in 2010-11	Ansari H, Ansari Z, Hutson JM, Southwell BR.	BMC Gastroenterol	2014	10.1186/1471-230X-14-125	PubMed
Potentially avoidable hospitalisation for constipation in Victoria, Australia in 2010-11	Ansari, H., Ansari, Z., Hutson, J.M., Southwell, B.R.	BMC Gastroenterology	2014	10.1186/1471-230X-14-125	Scopus
Potentially avoidable hospitalisation for constipation in Victoria, Australia in 2010-11	Ansari, H; Ansari, Z; Hutson, JM; Southwell, BR	BMC GASTROENTEROLOGY	2014	10.1186/1471-230X-14-125	WOS
Potentially avoidable hospitalisations of German nursing home patients? A cross-sectional study on utilisation patterns and potential consequences for healthcare	Leutgeb, R; Berger, SJ; Szecsenyi, J; Laux, G	BMJ OPEN	2019	10.1136/bmjopen-2018-025269	WOS
Potentially Preventable Hospital and Emergency Department Events: Lessons from a Large Innovation Project	Solberg LI, Ohnsorg KA, Parker ED, Ferguson R, Magnan S, Whitebird RR, Neely C, Brandenfels E, Williams MD, Dreskin M, Hinnenkamp T, Ziegenfuss JY.	Perm J	2018	10.7812/TPP/17-102	PubMed
Potentially Preventable Hospital and Emergency Department Events: Lessons from a Large Innovation Project	Solberg, L.I., Ohnsorg, K.A., Parker, E.D., Ferguson, R., Magnan, S., Whitebird, R.R., Neely, C., Brandenfels, E., Williams, M.D., Dreskin, M., Hinnenkamp, T., Ziegenfuss, J.Y.	The Permanente journal	2018	10.7812/TPP/17-102	Scopus
Potentially preventable hospitalisations for physical health conditions in community mental health service users: a population-wide linkage study	Sara G, Chen W, Large M, Ramanuj P, Curtis J, McMillan F, Mulder CL, Currow D, Burgess P.	Epidemiol Psychiatr Sci	2021	10.1017/S204579602100007X	PubMed
Potentially preventable hospitalisations for physical health conditions in community mental health service users: A population-wide linkage study	Sara, G., Chen, W., Large, M., Ramanuj, P., Curtis, J., McMillan, F., Mulder, C.L., Currow, D., Burgess, P.	Epidemiology and Psychiatric Sciences	2021	10.1017/S204579602100007X	Scopus
Potentially preventable hospitalisations for physical health conditions in community mental health service users: a population-wide linkage study	Sara, G; Chen, W; Large, M; Ramanuj, P; Curtis, J; McMillan, F; Mulder, CL; Currow, D; Burgess, P	EPIDEMIOLOGY AND PSYCHIATRIC SCIENCES	2021	10.1017/S204579602100007X	WOS
Potentially preventable hospitalizations among older adults with diabetes	Kim H, Helmer DA, Zhao Z, Boockvar K.	Am J Manag Care	2011		PubMed
Potentially preventable hospitalizations among older adults with diabetes	Kim, H., Helmer, D.A., Zhao, Z., Boockvar, K.	American Journal of Managed Care	2011		Scopus
Potentially Preventable Hospitalizations Among Older Adults With Diabetes	Kim, H; Helmer, DA; Zhao, ZL; Boockvar, K	AMERICAN JOURNAL OF MANAGED CARE	2011		WOS
Potentially preventable hospitalizations among older adults with diabetes.	Kim, H., Helmer, D.A., Zhao, Z., Booockvar, K.	The American journal of managed care	2011		Scopus
Potentially preventable hospitalizations in dementia: family caregiver experiences	Sadak T, Foster Zdon S, Ishado E, Zaslavsky O, Borson S.	Int Psychogeriatr	2017	10.1017/S1041610217000217	PubMed
Potentially preventable hospitalizations in dementia: Family caregiver experiences	Sadak, T., Foster Zdon, S., Ishado, E., Zaslavsky, O., Borson, S.	International Psychogeriatrics	2017	10.1017/S1041610217000217	Scopus
Potentially preventable hospitalizations in dementia: family caregiver experiences	Sadak, T; Zdon, SF; Ishado, E; Zaslavsky, O; Borson, S	INTERNATIONAL PSYCHOGERIATRICS	2017	10.1017/S1041610217000217	WOS
Potentially preventable hospitalizations-The 'pre-hospital syndrome': Retrospective observations from the MonashWatch self-reported health journey study in Victoria, Australia	Martin C, Hinkley N, Stockman K, Campbell D.	J Eval Clin Pract	2021	10.1111/jep.13460	PubMed
Potentially preventable hospitalizations-The 'pre-hospital syndrome': Retrospective observations from the MonashWatch self-reported health journey study in Victoria, Australia	Martin, C; Hinkley, N; Stockman, K; Campbell, D	JOURNAL OF EVALUATION IN CLINICAL PRACTICE	2021	10.1111/jep.13460	WOS
Potentially preventable hospitalizations—The ‘pre-hospital syndrome’: Retrospective observations from the MonashWatch self-reported health journey study in Victoria, Australia	Martin, C., Hinkley, N., Stockman, K., Campbell, D.	Journal of Evaluation in Clinical Practice	2021	10.1111/jep.13460	Scopus
Potentially Preventable Medical Hospitalizations and Emergency Department Visits by the Behavioral Health Population	Schmidt EM, Behar S, Barrera A, Cordova M, Beckum L.	J Behav Health Serv Res	2018	10.1007/s11414-017-9570-y	PubMed
Potentially Preventable Medical Hospitalizations and Emergency Department Visits by the Behavioral Health Population	Schmidt, E.M., Behar, S., Barrera, A., Cordova, M., Beckum, L.	Journal of Behavioral Health Services and Research	2018	10.1007/s11414-017-9570-y	Scopus
Potentially Preventable Medical Hospitalizations and Emergency Department Visits by the Behavioral Health Population	Schmidt, EM; Behar, S; Barrera, A; Cordova, M; Beckum, L	JOURNAL OF BEHAVIORAL HEALTH SERVICES & RESEARCH	2018	10.1007/s11414-017-9570-y	WOS
Potentially Preventable Spending Among High-Cost Medicare Patients: Implications for Healthcare Delivery	Khullar, D., Zhang, Y., Kaushal, R.	Journal of General Internal Medicine	2020	10.1007/s11606-020-05691-8	Scopus
Potentially Preventable Spending Among High-Cost Medicare Patients: Implications for Healthcare Delivery	Khullar, D; Zhang, YK; Kaushal, R	JOURNAL OF GENERAL INTERNAL MEDICINE	2020	10.1007/s11606-020-05691-8	WOS
Potentially Preventable Use of Emergency Services The Role of Low Health Literacy	Schumacher, JR; Hall, AG; Davis, TC; Arnold, CL; Bennett, RD; Wolf, MS; Carden, DL	MEDICAL CARE	2013	10.1097/MLR.0b013e3182992c5a	WOS
Potentially preventable use of emergency services: the role of low health literacy	Schumacher JR, Hall AG, Davis TC, Arnold CL, Bennett RD, Wolf MS, Carden DL.	Med Care	2013	10.1097/MLR.0b013e3182992c5a	PubMed
Potentially preventable use of emergency services: The role of low health literacy	Schumacher, J.R., Hall, A.G., Davis, T.C., Arnold, C.L., Bennett, R.D., Wolf, M.S., Carden, D.L.	Medical Care	2013	10.1097/MLR.0b013e3182992c5a	Scopus
Predicting and preventing avoidable hospital admissions: a review	Purdey S, Huntley A.	J R Coll Physicians Edinb	2013	10.4997/jrcpe.2013.415	PubMed
Predicting and preventing avoidable hospital admissions: A review	Purdy, S., Huntley, A.	Journal of the Royal College of Physicians of Edinburgh	2013	10.4997/JRCPE.2013.415	Scopus
Predicting risk of hospital and emergency department use for home care elderly persons through a secondary analysis of cross-national data	Morris JN, Howard EP, Steel K, Schreiber R, Fries BE, Lipsitz LA, Goldman B.	BMC Health Serv Res	2014	10.1186/s12913-014-0519-z	PubMed
Predicting risk of hospital and emergency department use for home care elderly persons through a secondary analysis of cross-national data	Morris, J.N., Howard, E.P., Steel, K., Schreiber, R., Fries, B.E., Lipsitz, L.A., Goldman, B.	BMC Health Services Research	2014	10.1186/s12913-014-0519-z	Scopus
Predicting risk of hospital and emergency department use for home care elderly persons through a secondary analysis of cross-national data	Morris, JN; Howard, EP; Steel, K; Schreiber, R; Fries, BE; Lipsitz, LA; Goldman, B	BMC HEALTH SERVICES RESEARCH	2014	10.1186/s12913-014-0519-z	WOS
Predicting Risk of Potentially Preventable Hospitalization in Older Adults with Dementia	Maust DT, Kim HM, Chiang C, Langa KM, Kales HC.	J Am Geriatr Soc	2019	10.1111/jgs.16030	PubMed
Predicting Risk of Potentially Preventable Hospitalization in Older Adults with Dementia	Maust, D.T., Kim, H.M., Chiang, C., Langa, K.M., Kales, H.C.	Journal of the American Geriatrics Society	2019	10.1111/jgs.16030	Scopus
Predicting Risk of Potentially Preventable Hospitalization in Older Adults with Dementia	Maust, DT; Kim, HM; Chiang, C; Langa, KM; Kales, HC	JOURNAL OF THE AMERICAN GERIATRICS SOCIETY	2019	10.1111/jgs.16030	WOS
Prediction of TEC using NavIC/GPS data with geostatistical method/forecasting capability comparison with other models	Mukesh, R., Karthikeyan, V., Soma, P., Sindhu, P.	Astrophysics and Space Science	2020	10.1007/s10509-020-03868-5	Scopus
Prediction of TEC using NavIC/GPS data with geostatistical method/forecasting capability comparison with other models	Mukesh, R; Karthikeyan, V; Soma, P; Sindhu, P	ASTROPHYSICS AND SPACE SCIENCE	2020	10.1007/s10509-020-03868-5	WOS
Prediction of unmet primary care needs for the medically vulnerable post-disaster: an interrupted time-series analysis of health system responses	Runkle JD, Zhang H, Karmaus W, Martin AB, Svendsen ER.	Int J Environ Res Public Health	2012	10.3390/ijerph9103384	PubMed
Prediction of unmet primary care needs for the medically vulnerable post-disaster: An interrupted time-series analysis of health system responses	Runkle, J.D., Zhang, H., Karmaus, W., Martin, A.B., Svendsen, E.R.	International Journal of Environmental Research and Public Health	2012	10.3390/ijerph9103384	Scopus
Prediction of Unmet Primary Care Needs for the Medically Vulnerable Post-Disaster: An Interrupted Time-Series Analysis of Health System Responses	Runkle, JD; Zhang, HM; Karmaus, W; Martin, AB; Svendsen, ER	INTERNATIONAL JOURNAL OF ENVIRONMENTAL RESEARCH AND PUBLIC HEALTH	2012	10.3390/ijerph9103384	WOS
Predictors and prognosis of delirium among older subjects in cardiac intensive care unit: focus on potentially preventable forms	Mossello E, Baroncini C, Pecorella L, Giulietti C, Chiti M, Caldi F, Cavallini MC, Simoni D, Baldasseroni S, Fumagalli S, Valoti P, Stroppa S, Parenti K, Ungar A, Masotti G, Marchionni N, Bari MD.	Eur Heart J Acute Cardiovasc Care	2020	10.1177/2048872619882359	PubMed
Predictors and prognosis of delirium among older subjects in cardiac intensive care unit: focus on potentially preventable forms	Mossello, E; Baroncini, C; Pecorella, L; Giulietti, C; Chiti, M; Caldi, F; Cavallini, MC; Simoni, D; Baldasseroni, S; Fumagalli, S; Valoti, P; Stroppa, S; Parenti, K; Ungar, A; Masotti, G; Marchionni, N; Di Bari, M	EUROPEAN HEART JOURNAL-ACUTE CARDIOVASCULAR CARE	2020	10.1177/2048872619882359	WOS
Predictors of preventable hospitalization in chronic disease: Priorities for change	Muenchberger, H; Kendall, E	JOURNAL OF PUBLIC HEALTH POLICY	2010	10.1057/jphp.2010.3	WOS
Prehospital emergency care in Mexico City: The opportunities of the healthcare system	Pinet, LM	SALUD PUBLICA DE MEXICO	2005	10.1590/S0036-36342005000100010	WOS
Prehospital emergency care in Mexico City: The opportunities of the healthcare system [Atención prehospitalaria de urgencias en el Distrito Federal: Las oportunidades del sistema de salud]	Pinet, L.M.	Salud Publica de Mexico	2005	10.1590/s0036-36342005000100010	Scopus
Prehospital identification of major trauma patients	Ocak, G., Sturms, L.M., Hoogeveen, J.M., Le Cessie, S., Jukema, G.N.	Langenbeck's Archives of Surgery	2009	10.1007/s00423-008-0340-4	Scopus
Presence of a community health center and uninsured emergency department visit rates in rural counties	Rust G, Baltrus P, Ye J, Daniels E, Quarshie A, Boumbulian P, Strothers H.	J Rural Health	2009	10.1111/j.1748-0361.2009.00193.x	PubMed
Presence of a community health center and uninsured emergency department visit rates in rural counties	Rust, G., Baltrus, P., Ye, J., Daniels, E., Quarshie, A., Boumbulian, P., Strothers, H.	Journal of Rural Health	2009	10.1111/j.1748-0361.2009.00193.x	Scopus
Presence of a Community Health Center and Uninsured Emergency Department Visit Rates in Rural Counties	Rust, G; Baltrus, P; Ye, JL; Daniels, E; Quarshie, A; Boumbulian, P; Strothers, H	JOURNAL OF RURAL HEALTH	2009	10.1111/j.1748-0361.2009.00193.x	WOS
Presentation blood glucose and death, hospitalization, and future diabetes risk in patients with acute heart failure syndromes	Sud, M; Wang, XS; Austin, PC; Lipscombe, LL; Newton, GE; Tu, JV; Vasan, RS; Lee, DS	EUROPEAN HEART JOURNAL	2015	10.1093/eurheartj/ehu462	WOS
Presentation to Emergency Departments for Acute Rhinosinusitis: Disparities in Symptoms by Race and Insurance Status	Bergmark RW, Sedaghat AR.	Otolaryngol Head Neck Surg	2016	10.1177/0194599816658018	PubMed
Presentation to Emergency Departments for Acute Rhinosinusitis: Disparities in Symptoms by Race and Insurance Status	Bergmark, R.W., Sedaghat, A.R.	Otolaryngology - Head and Neck Surgery (United States)	2016	10.1177/0194599816658018	Scopus
Presentation to Emergency Departments for Acute Rhinosinusitis: Disparities in Symptoms by Race and Insurance Status	Bergmark, RW; Sedaghat, AR	OTOLARYNGOLOGY-HEAD AND NECK SURGERY	2016	10.1177/0194599816658018	WOS
Preventable admissions and emergency-department-visits in pediatric asylum-seeking and non-asylum-seeking patients	Brandenberger J, Bozorgmehr K, Vogt F, Tylleskär T, Ritz N.	Int J Equity Health	2020	10.1186/s12939-020-01172-w	PubMed
Preventable admissions and emergency-department-visits in pediatric asylum-seeking and non-asylum-seeking patients	Brandenberger, J., Bozorgmehr, K., Vogt, F., Tylleskär, T., Ritz, N.	International Journal for Equity in Health	2020	10.1186/s12939-020-01172-w	Scopus
Preventable admissions and emergency-department-visits in pediatric asylum-seeking and non-asylum-seeking patients	Brandenberger, J; Bozorgmehr, K; Vogt, F; Tylleskar, T; Ritz, N	INTERNATIONAL JOURNAL FOR EQUITY IN HEALTH	2020	10.1186/s12939-020-01172-w	WOS
Preventable emergency admissions of older adults: an observational mixed-method study of rates, associative factors and underlying causes in two Dutch hospitals	van den Broek S, Heiwegen N, Verhofstad M, Akkermans R, van Westerop L, Schoon Y, Hesselink G.	BMJ Open	2020	10.1136/bmjopen-2020-040431	PubMed
Preventable emergency admissions of older adults: An observational mixed-method study of rates, associative factors and underlying causes in two Dutch hospitals	Van Den Broek, S., Heiwegen, N., Verhofstad, M., Akkermans, R., Van Westerop, L., Schoon, Y., Hesselink, G.	BMJ Open	2020	10.1136/bmjopen-2020-040431	Scopus
Preventable emergency admissions of older adults: an observational mixed-method study of rates, associative factors and underlying causes in two Dutch hospitals	van den Broek, S; Heiwegen, N; Verhofstad, M; Akkermans, R; van Westerop, L; Schoon, Y; Hesselink, G	BMJ OPEN	2020	10.1136/bmjopen-2020-040431	WOS
Preventable Emergency Hospital Admissions Among Adults With Intellectual Disability in England	Hosking FJ, Carey IM, DeWilde S, Harris T, Beighton C, Cook DG.	Ann Fam Med	2017	10.1370/afm.2104	PubMed
Preventable emergency hospital admissions among adults with intellectual disability in England	Hosking, F.J., Carey, I.M., Dewilde, S., Harris, T., Beighton, C., Cook, D.G.	Annals of Family Medicine	2017	10.1370/afm.2104	Scopus
Preventable Emergency Hospital Admissions Among Adults With Intellectual Disability in England	Hosking, FJ; Carey, IM; DeWilde, S; Harris, T; Beighton, C; Cook, DG	ANNALS OF FAMILY MEDICINE	2017	10.1370/afm.2104	WOS
Preventable hospital admissions among the homeless in California: a retrospective analysis of care for ambulatory care sensitive conditions	White BM, Ellis C Jr, Simpson KN.	BMC Health Serv Res	2014	10.1186/s12913-014-0511-7	PubMed
Preventable hospital admissions among the homeless in California: A retrospective analysis of care for ambulatory care sensitive conditions	White, B.M., Ellis, C., Simpson, K.N.	BMC Health Services Research	2014	10.1186/s12913-014-0511-7	Scopus
Preventable hospital admissions among the homeless in California: A retrospective analysis of care for ambulatory care sensitive conditions	White, BM; Ellis, C; Simpson, KN	BMC HEALTH SERVICES RESEARCH	2014	10.1186/s12913-014-0511-7	WOS
Preventable hospitalization and access to primary health care in an area of Southern Italy	Rizza, P; Bianco, A; Pavia, M; Angelillo, IF	BMC HEALTH SERVICES RESEARCH	2007	10.1186/1472-6963-7-134	WOS
Preventable hospitalizations and access to health care	Bindman AB, Grumbach K, Osmond D, Komaromy M, Vranizan K, Lurie N, Billings J, Stewart A.	JAMA	1995		PubMed
Preventable Hospitalizations and Access to Health Care	Bindman, A.B., Vranizan, K., Grumbach, K., Osmond, D., Komaromy, M., Lurie, N., Billings, J., Stewart, A.	JAMA: The Journal of the American Medical Association	1995	10.1001/jama.1995.03530040033037	Scopus
PREVENTABLE HOSPITALIZATIONS AND ACCESS TO HEALTH-CARE	BINDMAN, AB; GRUMBACH, K; OSMOND, D; KOMAROMY, M; VRANIZAN, K; LURIE, N; BILLINGS, J; STEWART, A	JAMA-JOURNAL OF THE AMERICAN MEDICAL ASSOCIATION	1995	10.1001/jama.274.4.305	WOS
Preventable hospitalizations and emergency department visits for angina, United States, 1995-2010	Will JC, Valderrama AL, Yoon PW.	Prev Chronic Dis	2013	10.5888/pcd10.120322	PubMed
Preventable hospitalizations and emergency department visits for Angina, United States, 1995-2010	Will, J.C., Valderrama, A.L., Yoon, P.W	Preventing Chronic Disease	2013	10.5888/pcd10.120322	Scopus
Preventable Hospitalizations and Emergency Department Visits for Angina, United States, 1995-2010	Will, JC; Valderrama, AL; Yoon, PW	PREVENTING CHRONIC DISEASE	2013	10.5888/pcd10.120322	WOS
Preventable hospitalizations from ambulatory care sensitive conditions in nursing homes: evidence from Switzerland	Muench, U., Simon, M., Guerbaai, R.-A., De Pietro, C., Zeller, A., Kressig, R.W., Zúñiga, F.	International Journal of Public Health	2019	10.1007/s00038-019-01294-1	Scopus
Preventing avoidable hospital admissions after emergency care in humanitarian settings: a cross-sectional review of Medecins Sans Frontieres emergency departments	Naidoo, M; Lee, JM; Trelles, M; Wallis, L; Chu, KM	BMJ OPEN	2021	10.1136/bmjopen-2021-049785	WOS
Preventing avoidable hospital admissions after emergency care in humanitarian settings: a cross-sectional review of Médecins Sans Frontières emergency departments	Naidoo M, Lee J, Trelles M, Wallis L, Chu KM.	BMJ Open	2021	10.1136/bmjopen-2021-049785	PubMed
Preventing avoidable hospital admissions after emergency care in humanitarian settings: A cross-sectional review of Médecins Sans Frontières emergency departments	Naidoo, M., Lee, J., Trelles, M., Wallis, L., Chu, K.M.	BMJ Open	2021	10.1136/bmjopen-2021-049785	Scopus
PREVENTING EMERGENCY ADMISSIONS: PHYSICIAN REVIEW OF 132 RANDOMLY SELECTED PATIENTS WITH AMBULATORY CARE SENSITIVE CONDITIONS	Steel, N; Fleetcroft, B	INTERNAL MEDICINE JOURNAL	2019		WOS
Primary Care Accessibility Effects on Health Care Utilization Among Urban Children	Mudd AE, Michael YL, Diez-Roux AV, Maltenfort M, Moore K, Melly S, Lê-Scherban F, Forrest CB.	Acad Pediatr	2020	10.1016/j.acap.2020.05.014	PubMed
Primary Care Accessibility Effects on Health Care Utilization Among Urban Children	Mudd, A.E., Michael, Y.L., Diez-Roux, A.V., Maltenfort, M., Moore, K., Melly, S., Lê-Scherban, F., Forrest, C.B.	Academic Pediatrics	2020	10.1016/j.acap.2020.05.014	Scopus
Primary Care Accessibility Effects on Health Care Utilization Among Urban Children	Mudd, AE; Michael, YL; Diez-Roux, AV; Maltenfort, M; Moore, K; Melly, S; Le-Scherban, F; Forrest, CB	ACADEMIC PEDIATRICS	2020	10.1016/j.acap.2020.05.014	WOS
Primary Care and Specialty Providers An Assessment of Continuity of Care, Utilization, and Expenditures	Romaire, MA; Haber, SG; Wensky, SG; McCall, N	MEDICAL CARE	2014		WOS
Primary care and specialty providers: an assessment of continuity of care, utilization, and expenditures	Romaire MA, Haber SG, Wensky SG, McCall N.	Med Care	2014	10.1097/MLR.0000000000000246	PubMed
Primary care and specialty providers: An assessment of continuity of care, utilization, and expenditures	Romaire, M.A., Haber, S.G., Wensky, S.G., McCall, N.	Medical Care	2014		Scopus
Primary Care Comprehensiveness and Care Coordination in Robust Specialist Networks Results in Lower Emergency Department Utilization: A Network Analysis of Medicaid Physician Networks	She Z, Gaglioti AH, Baltrus P, Li C, Moore MA, Immergluck LC, Rao A, Ayer T.	J Prim Care Community Health	2020	10.1177/2150132720924432	PubMed
Primary Care Comprehensiveness and Care Coordination in Robust Specialist Networks Results in Lower Emergency Department Utilization: A Network Analysis of Medicaid Physician Networks	She, Z., Gaglioti, A.H., Baltrus, P., Li, C., Moore, M.A., Immergluck, L.C., Rao, A., Ayer, T.	Journal of Primary Care and Community Health	2020	10.1177/2150132720924432	Scopus
Primary Care Comprehensiveness and Care Coordination in Robust Specialist Networks Results in Lower Emergency Department Utilization: A Network Analysis of Medicaid Physician Networks	She, ZW; Gaglioti, AH; Baltrus, P; Li, CH; Moore, MA; Immergluck, LC; Rao, AH; Ayer, T	JOURNAL OF PRIMARY CARE AND COMMUNITY HEALTH	2020	10.1177/2150132720924432	WOS
Primary Care Comprehensiveness Can Reduce Emergency Department Visits and Hospitalization in People with Hypertension in South Korea	Sung NJ, Choi YJ, Lee JH.	Int J Environ Res Public Health	2018	10.3390/ijerph15020272	PubMed
Primary care comprehensiveness can reduce emergency department visits and hospitalization in people with hypertension in South Korea	Sung, N.-J., Choi, Y.-J., Lee, J.-H.	International Journal of Environmental Research and Public Health	2018	10.3390/ijerph15020272	Scopus
Primary Care Comprehensiveness Can Reduce Emergency Department Visits and Hospitalization in People with Hypertension in South Korea	Sung, NJ; Choi, YJ; Lee, JH	INTERNATIONAL JOURNAL OF ENVIRONMENTAL RESEARCH AND PUBLIC HEALTH	2018	10.3390/ijerph15020272	WOS
Primary care continuity and potentially avoidable hospitalization in persons with dementia	Godard-Sebillotte C, Strumpf E, Sourial N, Rochette L, Pelletier E, Vedel I.	J Am Geriatr Soc	2021	10.1111/jgs.17049	PubMed
Primary care continuity and potentially avoidable hospitalization in persons with dementia	Godard-Sebillotte, C., Strumpf, E., Sourial, N., Rochette, L., Pelletier, E., Vedel, I.	Journal of the American Geriatrics Society	2021	10.1111/jgs.17049	Scopus
Primary care continuity and potentially avoidable hospitalization in persons with dementia	Godard-Sebillotte, C; Strumpf, E; Sourial, N; Rochette, L; Pelletier, E; Vedel, I	JOURNAL OF THE AMERICAN GERIATRICS SOCIETY	2021	10.1111/jgs.17049	WOS
Primary care outcomes in patients treated by nurse practitioners or physicians - A randomized trial	Mundinger, MO; Kane, RL; Lenz, ER; Totten, AM; Tsai, WY; Cleary, PD; Friedewald, WT; Siu, AL; Shelanski, ML	JAMA-JOURNAL OF THE AMERICAN MEDICAL ASSOCIATION	2000	10.1001/jama.283.1.59	WOS
Primary Care Physician Panel Size and Quality of Care: A Population-Based Study in Ontario, Canada	Dahrouge S, Hogg W, Younger J, Muggah E, Russell G, Glazier RH.	Ann Fam Med	2016	10.1370/afm.1864	PubMed
Primary care physician panel size and quality of care: A population-based study in Ontario, Canada	Dahrouge, S., Hogg, W., Younger, J., Muggah, E., Russell, G., Glazier, R.H.	Annals of Family Medicine	2016	10.1370/afm.1864	Scopus
Primary Care Physician Panel Size and Quality of Care: A Population-Based Study in Ontario, Canada	Dahrouge, S; Hogg, W; Younger, J; Muggah, E; Russell, G; Glazier, RH	ANNALS OF FAMILY MEDICINE	2016	10.1370/afm.1864	WOS
Primary care physician supply and children's health care use, access, and outcomes: findings from Canada	Guttmann A, Shipman SA, Lam K, Goodman DC, Stukel TA.	Pediatrics	2010	10.1542/peds.2009-2821	PubMed
Primary care physician supply and children's health care use, access, and outcomes: Findings from Canada	Guttmann, A., Shipman, S.A., Lam, K., Goodman, D.C., Stukel, T.A.	Pediatrics	2010	10.1542/peds.2009-2821	Scopus
Primary Care Physician Supply and Children's Health Care Use, Access, and Outcomes: Findings From Canada	Guttmann, A; Shipman, SA; Lam, K; Goodman, DC; Stukel, TA	PEDIATRICS	2010	10.1542/peds.2009-2821	WOS
PRIMARY-CARE, AVOIDABLE HOSPITALIZATION, AND OUTCOMES OF CARE - A LITERATURE-REVIEW AND METHODOLOGICAL APPROACH	FLEMING, ST	MEDICAL CARE RESEARCH AND REVIEW	1995	10.1177/107755879505200106	WOS
Prioritizing ambulatory care sensitive hospital admissions in England for research and intervention: A Delphi exercise	Purdy, S., Griffin, T., Salisbury, C., Sharp, D.	Primary Health Care Research and Development	2010	10.1017/S1463423609990211	Scopus
Profiles of Frequent Geriatric Users of Emergency Departments: A Latent Class Analysis	Dufour I, Dubuc N, Chouinard MC, Chiu Y, Courteau J, Hudon C.	J Am Geriatr Soc	2021	10.1111/jgs.16921	PubMed
Profiles of Frequent Geriatric Users of Emergency Departments: A Latent Class Analysis	Dufour, I., Dubuc, N., Chouinard, M.-C., Chiu, Y., Courteau, J., Hudon, C.	Journal of the American Geriatrics Society	2021	10.1111/jgs.16921	Scopus
Profiles of Frequent Geriatric Users of Emergency Departments: A Latent Class Analysis	Dufour, I; Dubuc, N; Chouinard, MC; Chiu, Y; Courteau, J; Hudon, C	JOURNAL OF THE AMERICAN GERIATRICS SOCIETY	2021	10.1111/jgs.16921	WOS
Providing emergency care and assessing a patient triage system in a referral hospital in Somaliland: a cross-sectional study	Sunyoto T, Van den Bergh R, Valles P, Gutierrez R, Ayada L, Zachariah R, Yassin A, Hinderaker SG, Harries AD.	BMC Health Serv Res	2014	10.1186/s12913-014-0531-3	PubMed
Providing emergency care and assessing a patient triage system in a referral hospital in Somaliland: A cross-sectional study	Sunyoto, T., Van Den Bergh, R., Valles, P., Gutierrez, R., Ayada, L., Zachariah, R., Yassin, A., Hinderaker, S.G., Harries, A.D.	BMC Health Services Research	2014	10.1186/s12913-014-0531-3	Scopus
Providing emergency care and assessing a patient triage system in a referral hospital in Somaliland: a cross-sectional study	Sunyoto, T; Van den Bergh, R; Valles, P; Gutierrez, R; Ayada, L; Zachariah, R; Yassin, A; Hinderaker, SG; Harries, AD	BMC HEALTH SERVICES RESEARCH	2014	10.1186/s12913-014-0531-3	WOS
Qualitative analysis of disposition decision making for patients referred for admission from the emergency department without definite medical acuity	Trinh, T; Elfergani, A; Bann, M	BMJ OPEN	2021	10.1136/bmjopen-2020-046598	WOS
Quality of Primary Care Provided to Medicare Beneficiaries by Nurse Practitioners and Physicians	Buerhaus P, Perloff J, Clarke S, O'Reilly-Jacob M, Zolotusky G, DesRoches CM.	Med Care	2018	10.1097/MLR.0000000000000908	PubMed
Quality of Primary Care Provided to Medicare Beneficiaries by Nurse Practitioners and Physicians	Buerhaus, P., Perloff, J., Clarke, S., O'Reilly-Jacob, M., Zolotusky, G., DesRoches, C.M.	Medical Care	2018	10.1097/MLR.0000000000000908	Scopus
Quality of Primary Care Provided to Medicare Beneficiaries by Nurse Practitioners and Physicians	Buerhaus, P; Perloff, J; Clarke, S; O'Reilly-Jacob, M; Zolotusky, G; DesRoches, CM	MEDICAL CARE	2018	10.1097/MLR.0000000000000908	WOS
Quantifying Ambulatory Care Use Preceding Emergency Department Visits and Hospitalizations for Ambulatory Care Sensitive Conditions	Dev S, Goldstick J, Peterson T, Brenner J, Abir M.	Am J Med Qual	2021	10.1097/JMQ.0000000000000029	PubMed
Race, ethnicity, poverty and the social determinants of the coronavirus divide: U.S. county-level disparities and risk factors	Samuel LJ, Gaskin DJ, Trujillo AJ, Szanton SL, Samuel A, Slade E.	BMC Public Health	2021	10.1186/s12889-021-11205-w	PubMed
Race, ethnicity, poverty and the social determinants of the coronavirus divide: U.S. county-level disparities and risk factors	Samuel, L.J., Gaskin, D.J., Trujillo, A.J., Szanton, S.L., Samuel, A., Slade, E.	BMC public health	2021	10.1186/s12889-021-11205-w	Scopus
Race, ethnicity, poverty and the social determinants of the coronavirus divide: US county-level disparities and risk factors	Samuel, LJ; Gaskin, DJ; Antonio, JT; Szanton, SL; Samuel, A; Slade, E	BMC PUBLIC HEALTH	2021	10.1186/s12889-021-11205-w	WOS
Racial Disparities in Age at Preventable Hospitalization Among US Adults	Biello, KB; Rawlings, J; Carroll-Scott, A; Browne, R; Ickovics, JR	AMERICAN JOURNAL OF PREVENTIVE MEDICINE	2010	10.1016/j.amepre.2009.08.027	WOS
Racial Disparities in Potentially Avoidable Hospitalizations During the COVID-19 Pandemic	Leuchter RK, Villaflores CWA, Norris KC, Sorensen A, Vangala S, Sarkisian CA.	Am J Prev Med	2021	10.1016/j.amepre.2021.01.036	PubMed
Racial Disparities in Potentially Avoidable Hospitalizations During the COVID-19 Pandemic	Leuchter, R.K., Villaflores, C.W.A., Norris, K.C., Sorensen, A., Vangala, S., Sarkisian, C.A.	American Journal of Preventive Medicine	2021	10.1016/j.amepre.2021.01.036	Scopus
Racial Disparities in Potentially Avoidable Hospitalizations During the COVID-19 Pandemic	Leuchter, RK; Villa, CWA; Norris, KC; Sorensen, A; Vangala, S; Sarkisian, CA	AMERICAN JOURNAL OF PREVENTIVE MEDICINE	2021	10.1016/j.amepre.2021.01.036	WOS
RACIAL DISPARITIES IN POTENTIALLY AVOIDABLE HOSPITALIZATIONS DURING THE COVID-19 PANDEMIC	Leuchter, RK; Villaflores, CW; Norris, KC; Sorensen, A; Vangala, S; Sarkisian, C	JOURNAL OF GENERAL INTERNAL MEDICINE	2021		WOS
Rapid Primary Care Follow-up from the ED to Reduce Avoidable Hospital Admissions	Carmel AS, Steel P, Tanouye R, Novikov A, Clark S, Sinha S, Tung J.	West J Emerg Med	2017	10.5811/westjem.2017.5.33593	PubMed
Rapid primary care follow-up from the ED to reduce avoidable hospital admissions	Carmel, A.S., Steel, P., Tanouye, R., Novikov, A., Clark, S., Sinha, S., Tung, J.	Western Journal of Emergency Medicine	2017	10.5811/westjem.2017.5.33593	Scopus
Rapid Primary Care Follow-up from the ED to Reduce Avoidable Hospital Admissions	Carmel, AS; Steel, P; Tanouye, R; Novikov, A; Clark, S; Sinha, S; Tung, J	WESTERN JOURNAL OF EMERGENCY MEDICINE	2017	10.5811/westjem.2017.5.33593	WOS
Rate and characteristics of urgent hospitalisation in persons with profound intellectual disabilities compared with general population	Amor-Salamanca A, Menchon JM.	J Intellect Disabil Res	2018	10.1111/jir.12436	PubMed
Rate and characteristics of urgent hospitalisation in persons with profound intellectual disabilities compared with general population	Amor-Salamanca, A., Menchon, J.M.	Journal of Intellectual Disability Research	2018	10.1111/jir.12436	Scopus
Rate and characteristics of urgent hospitalisation in persons with profound intellectual disabilities compared with general population	Amor-Salamanca, A; Menchon, JM	JOURNAL OF INTELLECTUAL DISABILITY RESEARCH	2018	10.1111/jir.12436	WOS
Rationale and design of the comparison of outcomes and access to care for heart failure (COACH) trial: A stepped wedge cluster randomized trial	Lee DS, Straus SE, Austin PC, Mohamed S, Taljaard M, Chong A, Fang J, Prasad T, Farkouh ME, Schull MJ, Mak S, Ross HJ.	Am Heart J	2021	10.1016/j.ahj.2021.05.003	PubMed
Rationale and design of the comparison of outcomes and access to care for heart failure (COACH) trial: A stepped wedge cluster randomized trial	Lee, D.S., Straus, S.E., Austin, P.C., Mohamed, S., Taljaard, M., Chong, A., Fang, J., Prasad, T., Farkouh, M.E., Schull, M.J., Mak, S., Ross, H.J.	American Heart Journal	2021	10.1016/j.ahj.2021.05.003	Scopus
Rationale and design of the comparison of outcomes and access to care for heart failure (COACH) trial: A stepped wedge cluster randomized trial	Lee, DS; Straus, SE; Austin, PC; Mohamed, S; Taljaard, M; Chong, A; Fang, JM; Prasad, T; Farkouh, ME; Schull, MJ; Mak, S; Ross, HJ	AMERICAN HEART JOURNAL	2021	10.1016/j.ahj.2021.05.003	WOS
Real-World Evidence of Dengue Burden on Hospitals in Mexico: Insights From the Automated Subsystem of Hospital Discharges (Saeh) Database	Maciás, A.E., Puentes-Rosas, E., Velandia, D., Morley, D., Coudeville, L., Baurin, N.	Revista de Investigacion Clinica	2019	10.24875/RIC.18002681	Scopus
Reasons for transferral to emergency departments of terminally ill patients - a French descriptive and retrospective study	Cornillon, P; Loiseau, S; Aublet-Cuvelier, B; Guastella, V	BMC PALLIATIVE CARE	2016	10.1186/s12904-016-0155-y	WOS
Reduced Risk of Hospitalization With Stronger Community Belonging Among Aging Canadians Living With Diabetes: Findings From Linked Survey and Administrative Data	Gupta N, Sheng Z.	Front Public Health	2021	10.3389/fpubh.2021.670082	PubMed
Reduced Risk of Hospitalization With Stronger Community Belonging Among Aging Canadians Living With Diabetes: Findings From Linked Survey and Administrative Data	Gupta, N., Sheng, Z.	Frontiers in Public Health	2021	10.3389/fpubh.2021.670082	Scopus
Reduced Risk of Hospitalization With Stronger Community Belonging Among Aging Canadians Living With Diabetes: Findings From Linked Survey and Administrative Data	Gupta, N; Sheng, ZH	FRONTIERS IN PUBLIC HEALTH	2021	10.3389/fpubh.2021.670082	WOS
Reducing ACSCs	Hughes, G.	Emergency Medicine Journal	2012	10.1136/emermed-2012-201675	Scopus
Reducing asthma morbidity and mortality. Cost containment strategies	Kowalski AF.	AAOHN J	2000		PubMed
Reducing avoidable hospital admission in older people: health status, frailty and predicting risk of ill-defined conditions diagnoses in older people admitted with collapse	Hunt K, Walsh B, Voegeli D, Roberts H.	Arch Gerontol Geriatr	2013	10.1016/j.archger.2013.03.004	PubMed
Reducing avoidable hospital admission in older people: Health status, frailty and predicting risk of ill-defined conditions diagnoses in older people admitted with collapse	Hunt, K., Walsh, B., Voegeli, D., Roberts, H.	Archives of Gerontology and Geriatrics	2013	10.1016/j.archger.2013.03.004	Scopus
Reducing avoidable hospital admission in older people: Health status, frailty and predicting risk of ill-defined conditions diagnoses in older people admitted with collapse	Hunt, K; Walsh, B; Voegeli, D; Roberts, H	ARCHIVES OF GERONTOLOGY AND GERIATRICS	2013	10.1016/j.archger.2013.03.004	WOS
Reducing costs and avoiding hospital admissions: can mobile working help?	Turner C.	Br J Community Nurs	2015	10.12968/bjcn.2015.20.5.245	PubMed
Reducing costs and avoiding hospital admissions: Can mobile working help?	Turner, C.	British Journal of Community Nursing	2015	10.12968/bjcn.2015.20.5.245	Scopus
Reducing Costs of Acute Care for Ambulatory Care-sensitive Medical Conditions The Central Roles of Comorbid Mental Illness	Yoon, J; Yano, EM; Altman, L; Cordasco, KM; Stockdale, SE; Chow, A; Barnett, PG; Rubenstein, LV	MEDICAL CARE	2012	10.1097/MLR.0b013e31824e3379	WOS
Reducing costs of acute care for ambulatory care-sensitive medical conditions: the central roles of comorbid mental illness	Yoon J, Yano EM, Altman L, Cordasco KM, Stockdale SE, Chow A, Barnett PG, Rubenstein LV.	Med Care	2012	10.1097/MLR.0b013e31824e3379	PubMed
Reducing costs of acute care for ambulatory care-sensitive medical conditions: The central roles of comorbid mental illness	Yoon, J., Yano, E.M., Altman, L., Cordasco, K.M., Stockdale, S.E., Chow, A., Barnett, P.G., Rubenstein, L.V.	Medical Care	2012	10.1097/MLR.0b013e31824e3379	Scopus
Reducing emergency presentations from long-term care: A before-and-after study of a multidisciplinary team intervention	Connolly, MJ; Broad, JB; Bish, T; Zhang, X; Bramley, D; Kerse, N; Bloomfield, K; Boyd, M	MATURITAS	2018	10.1016/j.maturitas.2018.08.014	WOS
Reducing health disparities of culturally-diverse minority populations through transcultural nursing in the home	Woerner, L., Duheme, M., Zielinski, L., Turchetti, S.	Health Disparities: Epidemiology, Racial/Ethnic and Socioeconomic Risk Factors and Strategies for Elimination	2013		Scopus
Reducing hospital admissions in older care home residents: a 4-year evaluation of the care home innovation Programme (CHIP)	Giebel C, Harvey D, Akpan A, Chamberlain P.	BMC Health Serv Res	2020	10.1186/s12913-020-4945-9	PubMed
Reducing hospital admissions in older care home residents: A 4-year evaluation of the care home innovation Programme (CHIP)	Giebel, C., Harvey, D., Akpan, A., Chamberlain, P.	BMC Health Services Research	2020	10.1186/s12913-020-4945-9	Scopus
Reducing hospital admissions in older care home residents: a 4-year evaluation of the care home innovation Programme (CHIP)	Giebel, C; Harvey, D; Akpan, A; Chamberlain, P	BMC HEALTH SERVICES RESEARCH	2020	10.1186/s12913-020-4945-9	WOS
Reducing Hospital Transfers from Aged Care Facilities: A Large-Scale Stepped Wedge Evaluation	Hullick CJ, Hall AE, Conway JF, Hewitt JM, Darcy LF, Barker RT, Oldmeadow C, Attia JR.	J Am Geriatr Soc	2021	10.1111/jgs.16890	PubMed
Reducing Hospital Transfers from Aged Care Facilities: A Large-Scale Stepped Wedge Evaluation	Hullick, C.J., Hall, A.E., Conway, J.F., Hewitt, J.M., Darcy, L.F., Barker, R.T., Oldmeadow, C., Attia, J.R.	Journal of the American Geriatrics Society	2021	10.1111/jgs.16890	Scopus
Reducing Hospital Transfers from Aged Care Facilities: A Large-Scale Stepped Wedge Evaluation	Hullick, CJ; Hall, AE; Conway, JF; Hewitt, JM; Darcy, LF; Barker, RT; Oldmeadow, C; Attia, JR	JOURNAL OF THE AMERICAN GERIATRICS SOCIETY	2021	10.1111/jgs.16890	WOS
Reducing inappropriate emergency department and avoidable hospitalization rates: assessing the influence of medical group practice characteristics	Blecker E.	Find Brief	2014		PubMed
Reducing inappropriate emergency department and avoidable hospitalization rates: assessing the influence of medical group practice characteristics.	Blecker, E.	Findings brief : health care financing &amp; organization	2014		Scopus
Reducing inequality in avoidable emergency admissions: Case studies of local health care systems in England using a realist approach	Ford J, Knight J, Brittain J, Bentley C, Sowden S, Castro A, Doran T, Cookson R.	J Health Serv Res Policy	2021	10.1177/13558196211021618	PubMed
Reducing inequality in avoidable emergency admissions: Case studies of local health care systems in England using a realist approach	Ford, J., Knight, J., Brittain, J., Bentley, C., Sowden, S., Castro, A., Doran, T., Cookson, R.	Journal of Health Services Research and Policy	2021	10.1177/13558196211021618	Scopus
Reducing inequality in avoidable emergency admissions: Case studies of local health care systems in England using a realist approach	Ford, J; Knight, J; Brittain, J; Bentley, C; Sowden, S; Castro, A; Doran, T; Cookson, R	JOURNAL OF HEALTH SERVICES RESEARCH & POLICY		10.1177/13558196211021618	WOS
Reducing Inpatient Hospital and Emergency Room Utilization Among Nursing Home Residents	Haber SG, Wensky SG, McCall NT.	J Aging Health	2017	10.1177/0898264316641074	PubMed
Reducing Inpatient Hospital and Emergency Room Utilization among Nursing Home Residents	Haber, S.G., Wensky, S.G., McCall, N.T.	Journal of Aging and Health	2017	10.1177/0898264316641074	Scopus
Reducing Inpatient Hospital and Emergency Room Utilization Among Nursing Home Residents: The Role of Patient-Provider Relationships	Haber, SG; Wensky, SG; McCall, NT	JOURNAL OF AGING AND HEALTH	2017	10.1177/0898264316641074	WOS
Reducing Potentially Avoidable Hospitalizations of Nursing Home Residents: Results of a Pilot Quality Improvement Project	Ouslander, J.G., Perloe, M., Givens, J.H., Kluge, L., Rutland, T., Lamb, G.	Journal of the American Medical Directors Association	2009	10.1016/j.jamda.2009.07.001	Scopus
Reducing Preventable Hospitalizations With Two Models of Transitional Care	Morrison J, Palumbo MV, Rambur B.	J Nurs Scholarsh	2016	10.1111/jnu.12210	PubMed
Reducing Preventable Hospitalizations With Two Models of Transitional Care	Morrison, J., Palumbo, M.V., Rambur, B.	Journal of Nursing Scholarship	2016	10.1111/jnu.12210	Scopus
Reducing Preventable Hospitalizations With Two Models of Transitional Care	Morrison, J; Palumbo, MV; Rambur, B	JOURNAL OF NURSING SCHOLARSHIP	2016	10.1111/jnu.12210	WOS
Reducing preventable patient transfers from long-term care facilities to emergency departments: a scoping review	Grant, KL; Lee, DD; Cheng, I; Baker, GR	CANADIAN JOURNAL OF EMERGENCY MEDICINE	2020	10.1017/cem.2020.416	WOS
Reducing Transfers among Long-Stay Nursing Facility Residents to Acute Care Settings: Effect of the 2013-2016 Centers for Medicare and Medicaid Services Initiative	Vadnais, AJ; Vreeland, E; Coomer, NM; Feng, ZL; Ingber, MJ	JOURNAL OF THE AMERICAN MEDICAL DIRECTORS ASSOCIATION	2020	10.1016/j.jamda.2020.01.002	WOS
Reducing Transfers among Long-Stay Nursing Facility Residents to Acute Care Settings: Effect of the 2013‒2016 Centers for Medicare and Medicaid Services Initiative	Vadnais AJ, Vreeland E, Coomer NM, Feng Z, Ingber MJ.	J Am Med Dir Assoc	2020	10.1016/j.jamda.2020.01.002	PubMed
Reducing Transfers among Long-Stay Nursing Facility Residents to Acute Care Settings: Effect of the 2013‒2016 Centers for Medicare and Medicaid Services Initiative	Vadnais, A.J., Vreeland, E., Coomer, N.M., Feng, Z., Ingber, M.J.	Journal of the American Medical Directors Association	2020	10.1016/j.jamda.2020.01.002	Scopus
Refinement of the HCUP Quality Indicators	Davies SM, Geppert J, McClellan M, McDonald KM, Romano PS, Shojania KG.	Refinement of the HCUP Quality Indicators	2001		PubMed
REFUGEES AND DISPLACED PERSONS - WAR, HUNGER, AND PUBLIC-HEALTH	TOOLE, MJ; WALDMAN, RJ	JAMA-JOURNAL OF THE AMERICAN MEDICAL ASSOCIATION	1993	10.1001/jama.270.5.600	WOS
Refugees and Displaced Persons: War, Hunger, and Public Health	Toole, M.J., Waldman, R.J.	JAMA: The Journal of the American Medical Association	1993	10.1001/jama.1993.03510050066029	Scopus
Refugees and displaced persons. War, hunger, and public health	Toole MJ, Waldman RJ.	JAMA	1993		PubMed
Regular Primary Care Lowers Hospitalisation Risk and Mortality in Seniors with Chronic Respiratory Diseases	Einarsdottir, K; Preen, DB; Emery, JD; Kelman, C; Holman, CDJ	JOURNAL OF GENERAL INTERNAL MEDICINE	2010	10.1007/s11606-010-1361-6	WOS
Rehabbed to Death Reframed: In Response to Rehabbed to Death: Breaking the Cycle	Ouslander, JG; Grabowski, DC	JOURNAL OF THE AMERICAN GERIATRICS SOCIETY	2019	10.1111/jgs.16127	WOS
Relationship between asthma drug therapy patterns and healthcare utilization	Shireman TI, Heaton PC, Gay WE, Cluxton RJ, Moomaw CJ.	Ann Pharmacother	2002	10.1345/aph.1A067	PubMed
Relationship between asthma drug therapy patterns and healthcare utilization	Shireman, T.I., Heaton, P.C., Gay, W.E., Cluxton Jr., R.J., Moomaw, C.J., Pérez, A., Larouche, M.	Annals of Pharmacotherapy	2002	10.1345/aph.1A067	Scopus
Relationship between asthma drug therapy patterns and healthcare utilization	Shireman, TI; Heaton, PC; Gay, WE; Cluxton, RJ; Moomaw, CJ	ANNALS OF PHARMACOTHERAPY	2002		WOS
Relationship between avoidable hospitalizations for diabetes mellitus and income level	Booth GL, Hux JE.	Arch Intern Med	2003	10.1001/archinte.163.1.101	PubMed
Relationship between avoidable hospitalizations for diabetes mellitus and income level	Booth, G.L., Hux, J.E.	Archives of Internal Medicine	2003	10.1001/archinte.163.1.101	Scopus
Relationship between avoidable hospitalizations for diabetes mellitus and income level	Booth, GL; Hux, JE	ARCHIVES OF INTERNAL MEDICINE	2003	10.1001/archinte.163.1.101	WOS
Relationship between health-related quality of life, comorbidities and acute health care utilisation, in adults with chronic conditions	Hutchinson, A.F., Graco, M., Rasekaba, T.M., Parikh, S., Berlowitz, D.J., Lim, W.K.	Health and Quality of Life Outcomes	2015	10.1186/s12955-015-0260-2	Scopus
Relationship between primary care physician visits and hospital/emergency use for uncomplicated hypertension, an ambulatory care-sensitive condition	Walker RL, Chen G, McAlister FA, Campbell NR, Hemmelgarn BR, Dixon E, Ghali W, Rabi D, Tu K, Jette N, Quan H; Hypertension Outcome and Surveillance Team.	Can J Cardiol	2014	10.1016/j.cjca.2014.09.035	PubMed
Relationship Between Primary Care Physician Visits and Hospital/Emergency Use for Uncomplicated Hypertension, an Ambulatory Care-Sensitive Condition	Walker, R.L., Chen, G., McAlister, F.A., Campbell, N.R.C., Hemmelgarn, B.R., Dixon, E., Ghali, W., Rabi, D., Tu, K., Jette, N., Quan, H.	Canadian Journal of Cardiology	2014	10.1016/j.cjca.2014.09.035	Scopus
Relationship Between Primary Care Physician Visits and Hospital/Emergency Use for Uncomplicated Hypertension, an Ambulatory Care-Sensitive Condition	Walker, RL; Chen, G; McAlister, FA; Campbell, NRC; Hemmelgarn, BR; Dixon, E; Ghali, W; Rabi, D; Tu, KR; Jette, N; Quan, H	CANADIAN JOURNAL OF CARDIOLOGY	2014	10.1016/j.cjca.2014.09.035	WOS
Relationship between use of general practice and healthcare costs at the end of life: a data linkage study in New South Wales, Australia	Tran B, Falster MO, Girosi F, Jorm L.	BMJ Open	2016	10.1136/bmjopen-2015-009410	PubMed
Relationship between use of general practice and healthcare costs at the end of life: A data linkage study in New South Wales, Australia	Tran, B., Falster, M.O., Girosi, F., Jorm, L.	BMJ Open	2016	10.1136/bmjopen-2015-009410	Scopus
Relationship between use of general practice and healthcare costs at the end of life: a data linkage study in New South Wales, Australia	Tran, B; Falster, MO; Girosi, F; Jorm, L	BMJ OPEN	2016	10.1136/bmjopen-2015-009410	WOS
Reliability and validity of pediatric triage tools evaluated in Low resource settings: A systematic review	Hansoti, B., Jenson, A., Keefe, D., De Ramirez, S.S., Anest, T., Twomey, M., Lobner, K., Kelen, G., Wallis, L.	BMC Pediatrics	2017	10.1186/s12887-017-0796-x	Scopus
Reliability and validity of pediatric triage tools evaluated in Low resource settings: a systematic review	Hansoti, B; Jenson, A; Keefe, D; De Ramirez, SS; Anest, T; Twomey, M; Lobner, K; Kelen, G; Wallis, L	BMC PEDIATRICS	2017	10.1186/s12887-017-0796-x	WOS
Residential aged care residents and components of end of life care in an Australian hospital	Leong, LJP; Crawford, GB	BMC PALLIATIVE CARE	2018	10.1186/s12904-018-0337-x	WOS
Residential Moving and Preventable Hospitalizations	Hutchings HA, Evans A, Barnes P, Demmler JC, Heaven M, Healy MA, James-Ellison M, Lyons RA, Maddocks A, Paranjothy S, Rodgers SE, Dunstan F.	Pediatrics	2016	10.1542/peds.2015-2836	PubMed
Residential moving and preventable hospitalizations	Hutchings, H.A., Evans, A., Barnes, P., Demmler, J.C., Heaven, M., Healy, M.A., James-Ellison, M., Lyons, R.A., Maddocks, A., Paranjothy, S., Rodgers, S.E., Dunstan, F.	Pediatrics	2016	10.1542/peds.2015-2836	Scopus
Residential Moving and Preventable Hospitalizations	Hutchings, HA; Evans, A; Barnes, P; Demmler, JC; Heaven, M; Healy, MA; James-Ellison, M; Lyons, RA; Maddocks, A; Paranjothy, S; Rodgers, SE; Dunstan, F	PEDIATRICS	2016	10.1542/peds.2015-2836	WOS
Resting Borg score as a predictor of safe discharge of chronic obstructive pulmonary disease from the emergency department observation unit	Sengupta R, Loftus TM, Doers M, Jandarov RA, Phillips M, Ko J, Panos RJ, Zafar MA.	Acad Emerg Med	2020	10.1111/acem.14091	PubMed
Resting Borg score as a predictor of safe discharge of chronic obstructive pulmonary disease from the emergency department observation unit	Sengupta, R., Loftus, T.M., Doers, M., Jandarov, R.A., Phillips, M., Ko, J., Panos, R.J., Zafar, M.A.	Academic Emergency Medicine	2020	10.1111/acem.14091	Scopus
Resting Borg score as a predictor of safe discharge of chronic obstructive pulmonary disease from the emergency department observation unit	Sengupta, R; Loftus, TM; Doers, M; Jandarov, RA; Phillips, M; Ko, J; Panos, RJ; Zafar, MA	ACADEMIC EMERGENCY MEDICINE	2020	10.1111/acem.14091	WOS
Risk Factors for Hospital Admissions Associated with Adverse Drug Events	Kongkaew, C; Hann, M; Mandal, J; Williams, SD; Metcalfe, D; Noyce, PR; Ashcroft, DM	PHARMACOTHERAPY	2013	10.1002/phar.1287	WOS
Risk of Care Home Placement following Acute Hospital Admission: Effects of a Pay-for-Performance Scheme for Dementia	Kasteridis P, Mason A, Goddard M, Jacobs R, Santos R, Rodriguez-Sanchez B, McGonigal G.	PLoS One	2016	10.1371/journal.pone.0155850	PubMed
Risk of care home placement following acute hospital admission: Effects of a pay-for-performance scheme for dementia	Kasteridis, P., Mason, A., Goddard, M., Jacobs, R., Santos, R., Rodriguez-Sanchez, B., McGonigal, G.	PLoS ONE	2016	10.1371/journal.pone.0155850	Scopus
Risk of Care Home Placement following Acute Hospital Admission: Effects of a Pay-for-Performance Scheme for Dementia	Kasteridis, P; Mason, A; Goddard, M; Jacobs, R; Santos, R; Rodriguez-Sanchez, B; McGonigal, G	PLOS ONE	2016	10.1371/journal.pone.0155850	WOS
Risk of Frequent Emergency Department Use Among an Ambulatory Care Sensitive Condition Population A Population-based Cohort Study	Hudon, C; Courteau, J; Chiu, YM; Chouinard, MC; Dubois, MF; Dubuc, N; Elazhary, N; Racine-Hemmings, F; Dufour, I; Vanasse, A	MEDICAL CARE	2020	10.1097/MLR.0000000000001270	WOS
Risk of Frequent Emergency Department Use Among an Ambulatory Care Sensitive Condition Population: A Population-based Cohort Study	Hudon C, Courteau J, Chiu YM, Chouinard MC, Dubois MF, Dubuc N, Elazhary N, Racine-Hemmings F, Dufour I, Vanasse A.	Med Care	2020	10.1097/MLR.0000000000001270	PubMed
Risk of Frequent Emergency Department Use among an Ambulatory Care Sensitive Condition Population: A Population-based Cohort Study	Hudon, C., Courteau, J., Chiu, Y.M., Chouinard, M.-C., Dubois, M.-F., Dubuc, N., Elazhary, N., Racine-Hemmings, F., Dufour, I., Vanasse, A.	Medical Care	2020	10.1097/MLR.0000000000001270	Scopus
Risk of preventable hospitalization before and after diagnosis among rheumatoid arthritis patients compared to non-rheumatoid arthritis controls	Kuo, C.-F., Burns, P.B., Chen, J.-S., Wang, L., Chung, K.C.	Joint Bone Spine	2020	10.1016/j.jbspin.2019.11.005	Scopus
Risk of rehospitalisation and death for vulnerable New Zealand children	Oliver, J., Foster, T., Kvalsvig, A., Williamson, D.A., Baker, M.G., Pierse, N.	Archives of Disease in Childhood	2018	10.1136/archdischild-2017-312671	Scopus
Root Cause Analyses of Transfers of Skilled Nursing Facility Patients to Acute Hospitals: Lessons Learned for Reducing Unnecessary Hospitalizations	Ouslander, JG; Naharci, I; Engstrom, G; Shutes, J; Wolf, DG; Alpert, G; Rojido, C; Tappen, R; Newman, D	JOURNAL OF THE AMERICAN MEDICAL DIRECTORS ASSOCIATION	2016	10.1016/j.jamda.2015.11.018	WOS
Rule-In and Rule-Out of Myocardial Infarction Using Cardiac Troponin and Glycemic Biomarkers in Patients with Symptoms Suggestive of Acute Coronary Syndrome	Shortt C, Ma J, Clayton N, Sherbino J, Whitlock R, Pare G, Hill SA, McQueen M, Mehta SR, Devereaux PJ, Worster A, Kavsak PA.	Clin Chem	2017	10.1373/clinchem.2016.261545	PubMed
Rural trauma: The challenge for the next decade	Rogers, F.B., Shackford, S.R., Osler, T.M., Vane, D.W., Davis, J.H.	Journal of Trauma - Injury, Infection and Critical Care	1999	10.1097/00005373-199910000-00038	Scopus
Safe control of Air Cushion Surge Chambers in hydropower systems	Jianfeng, A., Jian, Z., Hazrati, A.	Scientia Iranica	2013		Scopus
Safe control of air cushion surge chambers in hydropower systems	Jianfeng, A; Jian, Z; Hazrati, A	SCIENTIA IRANICA	2013		WOS
Safety and effectiveness of mail order pharmacy use in diabetes	Schmittdiel JA, Karter AJ, Dyer WT, Chan J, Duru OK.	Am J Manag Care	2013		PubMed
Safety and effectiveness of mail order pharmacy use in diabetes	Schmittdiel, J.A., Karter, A.J., Dyer, W.T., Chan, J., Duru, O.K.	American Journal of Managed Care	2013		Scopus
Safety and Effectiveness of Mail Order Pharmacy Use in Diabetes	Schmittdiel, JA; Karter, AJ; Dyer, WT; Chan, J; Duru, OK	AMERICAN JOURNAL OF MANAGED CARE	2013		WOS
Self-management, preventable conditions and assessment of care among young adults with myelomeningocele	Mahmood D, Dicianno B, Bellin M.	Child Care Health Dev	2011	10.1111/j.1365-2214.2011.01299.x	PubMed
Self-management, preventable conditions and assessment of care among young adults with myelomeningocele	Mahmood, D., Dicianno, B., Bellin, M.	Child: Care, Health and Development	2011	10.1111/j.1365-2214.2011.01299.x	Scopus
Self-management, preventable conditions and assessment of care among young adults with myelomeningocele	Mahmood, D; Dicianno, B; Bellin, M	CHILD CARE HEALTH AND DEVELOPMENT	2011	10.1111/j.1365-2214.2011.01299.x	WOS
Serious Illness and End-of-Life Treatments for Nurses Compared with the General Population	Bynum J, Passow H, Austin A, Carmichael D, Grodstein F.	J Am Geriatr Soc	2019	10.1111/jgs.16044	PubMed
Serious Illness and End-of-Life Treatments for Nurses Compared with the General Population	Bynum, J., Passow, H., Austin, A., Carmichael, D., Grodstein, F.	Journal of the American Geriatrics Society	2019	10.1111/jgs.16044	Scopus
Serious Illness and End-of-Life Treatments for Nurses Compared with the General Population	Bynum, J; Passow, H; Austin, A; Carmichael, D; Grodstein, F	JOURNAL OF THE AMERICAN GERIATRICS SOCIETY	2019	10.1111/jgs.16044	WOS
Serving distinct populations: performance in Medicaid HMOs and commercial HMOs	Terman J, Lee KH.	Health Care Manag (Frederick)	2011	10.1097/HCM.0b013e3182350f6f	PubMed
Serving distinct populations: Performance in medicaid HMOs and commercial HMOs	Terman, J., Lee, K.-H.	Health Care Manager	2011	10.1097/HCM.0b013e3182350f6f	Scopus
Severe respiratory failure after elective repeat cesarean delivery: a potentially preventable condition leading to extracorporeal membrane oxygenation	Keszler M, Carbone MT, Cox C, Schumacher RE.	Pediatrics	1992		PubMed
Severe respiratory failure after elective repeat cesarean delivery: A potentially preventable condition leading to extracorporeal membrane oxygenation	Keszler, M., Carbone, M.T., Cox, C., Schumacher, R.E.	Pediatrics	1992		Scopus
She doesn't want to go to hospital. That's one thing she hates: Collective performativity in avoidable nursing home to hospital transfers	Makela, P	JOURNAL OF EVALUATION IN CLINICAL PRACTICE	2018	10.1111/jep.12985	WOS
Short-stay admissions at an inner city hospital: a cross-sectional analysis	Pope I, Ismail S, Bloom B, Jansen G, Burn H, McCoy D, Harris T.	Emerg Med J	2018	10.1136/emermed-2016-205803	PubMed
Short-stay admissions at an inner city hospital: A cross-sectional analysis	Pope, I., Ismail, S., Bloom, B., Jansen, G., Burn, H., McCoy, D., Harris, T.	Emergency Medicine Journal	2018	10.1136/emermed-2016-205803	Scopus
Short-stay admissions at an inner city hospital: a cross-sectional analysis	Pope, I; Ismail, S; Bloom, B; Jansen, G; Burn, H; McCoy, D; Harris, T	EMERGENCY MEDICINE JOURNAL	2018	10.1136/emermed-2016-205803	WOS
Short-term hospitalizations in pediatric services.	Mas, M; Casuriaga, AL; Uria, M; Galazka, J; Picon, T; Giachetto, G	ANALES DE LA FACULTAD DE MEDICINA-UNIVERSIDAD DE LA REPUBLICA URUGUAY	2016		WOS
Should GPs be fined for rises in avoidable emergency admissions to hospital? No	Nagpaul C.	BMJ	2013	10.1136/bmj.f1391	PubMed
Should GPs be fined for rises in avoidable emergency admissions to hospital? No	Nagpaul, C.	BMJ (Online)	2013	10.1136/bmj.f1391	Scopus
Should GPs be fined for rises in avoidable emergency admissions to hospital? No	Nagpaul, C	BMJ-BRITISH MEDICAL JOURNAL	2013	10.1136/bmj.f1391	WOS
Should GPs be fined for rises in avoidable emergency admissions to hospital? Yes	McShane M.	BMJ	2013	10.1136/bmj.f1389	PubMed
Should GPs be fined for rises in avoidable emergency admissions to hospital? Yes	McShane, M.	BMJ (Online)	2013	10.1136/bmj.f1389	Scopus
Should GPs be fined for rises in avoidable emergency admissions to hospital? Yes	McShane, M	BMJ-BRITISH MEDICAL JOURNAL	2013	10.1136/bmj.f1389	WOS
Should we still use motor vehicle intrusion as a sole triage criterion for the use of trauma center resources?	Matsushima K, Chouliaras K, Koenig W, Preston C, Gorospe D, Demetriades D.	Injury	2016	10.1016/j.injury.2015.10.033	PubMed
Sources of non-compliance with clinical practice guidelines in trauma triage: a decision science study	Mohan D, Rosengart MR, Farris C, Fischhoff B, Angus DC, Barnato AE.	Implement Sci	2012	10.1186/1748-5908-7-103	PubMed
Southside medical homes network: linking emergency department patients to community care	Marr AL, Pillow T, Brown S.	Prehosp Disaster Med	2008		PubMed
Southside Medical Homes Network: Linking Emergency Department Patients to Community Care	Marr, AL; Pillow, T; Brown, S	PREHOSPITAL AND DISASTER MEDICINE	2008	10.1017/S1049023X00065018	WOS
Southside medical homes network: linking emergency department patients to community care.	Marr, A.L., Pillow, T., Brown, S.	Prehospital and disaster medicine : the official journal of the National Association of EMS Physicians and the World Association for Emergency and Disaster Medicine in association with the Acute Care Foundation	2008		Scopus
Spatial access to health care and elderly ambulatory care sensitive hospitalizations	Huang Y, Meyer P, Jin L.	Public Health	2019	10.1016/j.puhe.2019.01.005	PubMed
Spatial access to health care and elderly ambulatory care sensitive hospitalizations	Huang, Y., Meyer, P., Jin, L.	Public Health	2019	10.1016/j.puhe.2019.01.005	Scopus
Spatial access to health care and elderly ambulatory care sensitive hospitalizations	Huang, Y; Meyer, P; Jin, L	PUBLIC HEALTH	2019	10.1016/j.puhe.2019.01.005	WOS
Spinal Motion Restriction	Kane E, Braithwaite S.	StatPearls	2021		PubMed
Spinal Motion Restriction in the Trauma Patient - A Joint Position Statement	Fischer PE, Perina DG, Delbridge TR, Fallat ME, Salomone JP, Dodd J, Bulger EM, Gestring ML.	Prehosp Emerg Care	2018	10.1080/10903127.2018.1481476	PubMed
Spontaneous circulation of myeloid-lymphoid-initiating cells and SCID-repopulating cells in sickle cell crisis	Lamming CE, Augustin L, Blackstad M, Lund TC, Hebbel RP, Verfaillie CM.	J Clin Invest	2003	10.1172/JCI15956	PubMed
Staff stakeholder views on the role of UK paramedics in advance care planning for patients in their last year of life	Goodwin, L., Proctor, A., Kirby, K., Black, S., Pocock, L., Richardson, S., Stonehouse, J., Taylor, H., Voss, S., Benger, J.	Progress in Palliative Care	2021	10.1080/09699260.2021.1872140	Scopus
Staff stakeholder views on the role of UK paramedics in advance care planning for patients in their last year of life	Goodwin, L; Proctor, A; Kirby, K; Black, S; Pocock, L; Richardson, S; Stonehouse, J; Taylor, H; Voss, S; Benger, J	PROGRESS IN PALLIATIVE CARE	2021	10.1080/09699260.2021.1872140	WOS
Strategies for reducing potentially avoidable hospitalizations for ambulatory care - Sensitive conditions	Freund, T., Campbell, S.M., Geissler, S., Kunz, C.U., Mahler, C., Peters-Klimm, F., Szecsenyi, J.	Annals of Family Medicine	2013	10.1370/afm.1498	Scopus
Strategies for reducing potentially avoidable hospitalizations for ambulatory care-sensitive conditions	Freund T, Campbell SM, Geissler S, Kunz CU, Mahler C, Peters-Klimm F, Szecsenyi J.	Ann Fam Med	2013	10.1370/afm.1498	PubMed
Strategies for Reducing Potentially Avoidable Hospitalizations for Ambulatory Care-Sensitive Conditions	Freund, T; Campbell, SM; Geissler, S; Kunz, CU; Mahler, C; Peters-Klimm, F; Szecsenyi, J	ANNALS OF FAMILY MEDICINE	2013	10.1370/afm.1498	WOS
Strategies to reduce potentially avoidable hospitalisations among long-term care facility residents	Ouslander, J	BMJ QUALITY & SAFETY	2019	10.1136/bmjqs-2019-009384	WOS
Strengthening Geriatric Expertise in Swiss Nursing Homes: INTERCARE Implementation Study Protocol	Zúñiga F, De Geest S, Guerbaai RA, Basinska K, Nicca D, Kressig RW, Zeller A, Wellens NIH, De Pietro C, Vlaeyen E, Desmedt M, Serdaly C, Simon M.	J Am Geriatr Soc	2019	10.1111/jgs.16074	PubMed
Strengthening Geriatric Expertise in Swiss Nursing Homes: INTERCARE Implementation Study Protocol	Zúñiga, F., De Geest, S., Guerbaai, R.A., Basinska, K., Nicca, D., Kressig, R.W., Zeller, A., Wellens, N.I.H., De Pietro, C., Vlaeyen, E., Desmedt, M., Serdaly, C., Simon, M.	Journal of the American Geriatrics Society	2019	10.1111/jgs.16074	Scopus
Strengthening Geriatric Expertise in Swiss Nursing Homes: INTERCARE Implementation Study Protocol	Zuniga, F; De Geest, S; Guerbaai, RA; Basinska, K; Nicca, D; Kressig, RW; Zeller, A; Wellens, NIH; De Pietro, C; Vlaeyen, E; Desmedt, M; Serdaly, C; Simon, M	JOURNAL OF THE AMERICAN GERIATRICS SOCIETY	2019	10.1111/jgs.16074	WOS
STROBE-compliant article: Is continuity of care associated with avoidable hospitalization among older asthmatic patients?	Kao, YH; Wu, SC	MEDICINE	2016	10.1097/MD.0000000000004948	WOS
Structure and method of working of outpatient services within the framework of psychiatric care in areas close to the patient's domicile [AUFBAU UND ARBEITSWEISE AMBULANTER DIENSTE IM RAHMEN GEMEINDENAHER PSYCHIATRISCHER VERSORGUNG]	Bergener, M., Classen, A., Finklenburg, J., Jakumeit, U.	Psychiatrische Praxis	1980		Scopus
Subacute sclerosing panencephalitis: clinical phenotype, epidemiology, and preventive interventions	Mekki M, Eley B, Hardie D, Wilmshurst JM.	Dev Med Child Neurol	2019	10.1111/dmcn.14166	PubMed
Subacute sclerosing panencephalitis: clinical phenotype, epidemiology, and preventive interventions	Mekki, M., Eley, B., Hardie, D., Wilmshurst, J.M.	Developmental Medicine and Child Neurology	2019	10.1111/dmcn.14166	Scopus
Subacute sclerosing panencephalitis: clinical phenotype, epidemiology, and preventive interventions	Mekki, M; Eley, B; Hardie, D; Wilmshurst, JM	DEVELOPMENTAL MEDICINE AND CHILD NEUROLOGY	2019	10.1111/dmcn.14166	WOS
Sudden cardiac death of the young in Michigan: development and implementation of a novel mortality review system	Mukerji S, Hanna B, Duquette D, Bach J, Rosenman K.	J Community Health	2010	10.1007/s10900-010-9273-2	PubMed
Sudden cardiac death of the young in Michigan: Development and implementation of a novel mortality review system	Mukerji, S., Hanna, B., Duquette, D., Bach, J., Rosenman, K.	Journal of Community Health	2010	10.1007/s10900-010-9273-2	Scopus
Sudden Cardiac Death of the Young in Michigan: Development and Implementation of a Novel Mortality Review System	Mukerji, S; Hanna, B; Duquette, D; Bach, J; Rosenman, K	JOURNAL OF COMMUNITY HEALTH	2010	10.1007/s10900-010-9273-2	WOS
Suitability of current definitions of ambulatory care sensitive conditions for research in emergency department patients: a secondary health data analysis	Frick J, Möckel M, Muller R, Searle J, Somasundaram R, Slagman A.	BMJ Open	2017	10.1136/bmjopen-2017-016109	PubMed
Suitability of current definitions of ambulatory care sensitive conditions for research in emergency department patients: A secondary health data analysis	Frick, J., Möckel, M., Muller, R., Searle, J., Somasundaram, R., Slagman, A.	BMJ Open	2017	10.1136/bmjopen-2017-016109	Scopus
Suitability of current definitions of ambulatory care sensitive conditions for research in emergency department patients: a secondary health data analysis	Frick, J; Mockel, M; Muller, R; Searle, J; Somasundaram, R; Slagman, A	BMJ OPEN	2017	10.1136/bmjopen-2017-016109	WOS
Systemwide provider performance in a Medicaid program - Profiling the care of patients with chronic illnesses	Powe, NR; Weiner, JP; Starfield, B; Stuart, M; Baker, A; Steinwachs, DM	MEDICAL CARE	1996	10.1097/00005650-199608000-00007	WOS
Systemwide Provider Performance in a Medicaid Program: Profiling the Care of Patients with Chronic Illnesses	Powe, N.R., Weiner, J.P., Starfield, B., Stuart, M., Baker, A., Steinwachs, D.M.	Medical Care	1996	10.1097/00005650-199608000-00007	Scopus
Systemwide provider performance in a Medicaid program. Profiling the care of patients with chronic illnesses	Powe NR, Weiner JP, Starfield B, Stuart M, Baker A, Steinwachs DM.	Med Care	1996	10.1097/00005650-199608000-00007	PubMed
Team functioning as a predictor of patient outcomes in early medical home implementation	Wu FM, Rubenstein LV, Yoon J.	Health Care Manage Rev	2018	10.1097/HMR.0000000000000196	PubMed
Team functioning as a predictor of patient outcomes in early medical home implementation	Wu, F.M., Rubenstein, L.V., Yoon, J.	Health Care Management Review	2018	10.1097/HMR.0000000000000196	Scopus
Team functioning as a predictor of patient outcomes in early medical home implementation	Wu, FM; Rubenstein, LV; Yoon, J	HEALTH CARE MANAGEMENT REVIEW	2018	10.1097/HMR.0000000000000196	WOS
Tears for my sisters: The tragedy of obstetric fistula	Wall, L.L.	Tears for My Sisters: The Tragedy of Obstetric Fistula	2018		Scopus
Tenncare disenrollment and avoidable hospital visits in Davidson County, Tennessee	Emerson, J.S., Hull, P.C., van Cain, A., Novotny, M., Stanley, R.E., Levine, R.S.	Journal of Health Care for the Poor and Underserved	2012	10.1353/hpu.2012.0002	Scopus
Termination of resuscitation for adult traumatic cardiopulmonary arrest	National Association of EMS Physicians and American College of Surgeons Committee on Trauma.	Prehosp Emerg Care	2012	10.3109/10903127.2012.695857	PubMed
The 1% of emergency room visits for non-traumatic dental conditions in British Columbia: Misconceptions about the numbers	Brondani M, Ahmad SH.	Can J Public Health	2017	10.17269/CJPH.108.5915	PubMed
The 1% of emergency room visits for non-traumatic dental conditions in British Columbia: Misconceptions about the numbers	Brondani, M., Ahmad, S.H.	Canadian Journal of Public Health	2017	10.17269/CJPH.108.5915	Scopus
The 1% of emergency room visits for non-traumatic dental conditions in British Columbia: Misconceptions about the numbers	Brondani, M; Ahmad, SH	CANADIAN JOURNAL OF PUBLIC HEALTH-REVUE CANADIENNE DE SANTE PUBLIQUE	2017	10.17269/CJPH.108.5915	WOS
The association between community-level insurance coverage and emergency department use	Baker, L.C., Hsia, R.Y.	Medical Care	2014	10.1097/MLR.0000000000000136	Scopus
The Association Between Community-level Insurance Coverage and Emergency Department Use	Baker, LC; Hsia, RY	MEDICAL CARE	2014	10.1097/MLR.0000000000000136	WOS
The association between payment model and specialist physicians' selection of patients with diabetes: a descriptive study	Quinn AE, Edwards A, Senior P, McBrien KA, Hemmelgarn BR, Tonelli M, Au F, Ma Z, Weaver RG, Manns BJ.	CMAJ Open	2019	10.9778/cmajo.20180171	PubMed
The association between primary care quality and health-care use, costs and outcomes for people with serious mental illness: a retrospective observational study	Jacobs R, Aylott L, Dare C, Doran T, Gilbody S, Goddard M, Gravelle H, Gutacker N, Kasteridis P, Kendrick T, Mason A, Rice N, Ride J, Siddiqi N, Williams R.	The association between primary care quality and health-care use, costs and outcomes for people with serious mental illness: a retrospective observational study	2020	10.3310/hsdr08250	PubMed
The Association of Health Literacy With Preventable Emergency Department Visits: A Cross-sectional Study	Balakrishnan MP, Herndon JB, Zhang J, Payton T, Shuster J, Carden DL.	Acad Emerg Med	2017	10.1111/acem.13244	PubMed
The Association of Health Literacy With Preventable Emergency Department Visits: A Cross-sectional Study	Balakrishnan, M.P., Herndon, J.B., Zhang, J., Payton, T., Shuster, J., Carden, D.L.	Academic Emergency Medicine	2017	10.1111/acem.13244	Scopus
The Association of Health Literacy With Preventable Emergency Department Visits: A Cross-sectional Study	Balakrishnan, MP; Herndon, JB; Zhang, JN; Payton, T; Shuster, J; Carden, DL	ACADEMIC EMERGENCY MEDICINE	2017	10.1111/acem.13244	WOS
The association of longitudinal and interpersonal continuity of care with emergency department use, hospitalization, and mortality among Medicare beneficiaries	Bentler SE, Morgan RO, Virnig BA, Wolinsky FD.	PLoS One	2014	10.1371/journal.pone.0115088	PubMed
The association of longitudinal and interpersonal continuity of care with emergency department use, hospitalization, and mortality among medicare beneficiaries	Bentler, S.E., Morgan, R.O., Virnig, B.A., Wolinsky, F.D., Hernandez-Boussard, T.	PLoS ONE	2014	10.1371/journal.pone.0115088	Scopus
The Association of Longitudinal and Interpersonal Continuity of Care with Emergency Department Use, Hospitalization, and Mortality among Medicare Beneficiaries	Bentler, SE; Morgan, RO; Virnig, BA; Wolinsky, FD	PLOS ONE	2014	10.1371/journal.pone.0115088	WOS
The association of quality of primary care and the potentially avoidable emergency department (ED) visit	Chang, T., Kuo, R.N.	Taiwan Journal of Public Health	2017	10.6288/TJPH201736106080	Scopus
The Capacities of Primary Health Care in Hungary: A Problem Statement	Balint, C	EUROPEAN JOURNAL OF INVESTIGATION IN HEALTH PSYCHOLOGY AND EDUCATION	2020	10.3390/ejihpe10010025	WOS
The Complexity of Determining Whether a Nursing Home Transfer Is Avoidable at Time of Transfer	Unroe KT, Carnahan JL, Hickman SE, Sachs GA, Hass Z, Arling G.	J Am Geriatr Soc	2018	10.1111/jgs.15286	PubMed
The Complexity of Determining Whether a Nursing Home Transfer Is Avoidable at Time of Transfer	Unroe, K.T., Carnahan, J.L., Hickman, S.E., Sachs, G.A., Hass, Z., Arling, G.	Journal of the American Geriatrics Society	2018	10.1111/jgs.15286	Scopus
The Complexity of Determining Whether a Nursing Home Transfer Is Avoidable at Time of Transfer	Unroe, KT; Carnahan, JL; Hickman, SE; Sachs, GA; Hass, Z; Arling, G	JOURNAL OF THE AMERICAN GERIATRICS SOCIETY	2018	10.1111/jgs.15286	WOS
The concept and usefulness of ambulatory care sensitive conditions as indicators of quality and access to primary health care	Ansari, Z	AUSTRALIAN JOURNAL OF PRIMARY HEALTH	2007	10.1071/PY07043	WOS
The ecology of medical care for adults in Alberta, 2002/03 to 2016/17: a retrospective cohort study	McAlister FA, Tonelli M, Wiebe N, Lin M, Svenson LW, Dean S.	CMAJ Open	2020	10.9778/cmajo.20190188	PubMed
The effect of adherence with health supervision guidelines among US infants on avoidable hospitalizations and emergency department visits.	Hakim, RB; Ronsaville, DS	AMERICAN JOURNAL OF EPIDEMIOLOGY	2001		WOS
The effect of Evercare on hospital use	Kane RL, Keckhafer G, Flood S, Bershadsky B, Siadaty MS.	J Am Geriatr Soc	2003	10.1046/j.1532-5415.2003.51461.x	PubMed
The effect of Evercare on hospital use	Kane, R.L., Keckhafer, G., Flood, S., Bershadsky, B., Siadaty, M.S.	Journal of the American Geriatrics Society	2003	10.1046/j.1532-5415.2003.51461.x	Scopus
The effect of evercare on hospital use	Kane, RL; Keckhafer, G; Flood, S; Bershadsky, B; Siadaty, MS	JOURNAL OF THE AMERICAN GERIATRICS SOCIETY	2003	10.1046/j.1532-5415.2003.51461.x	WOS
The effect of North Carolina free clinics on hospitalizations for ambulatory care sensitive conditions among the uninsured	Hutchison, J; Thompson, ME; Troyer, J; Elnitsky, C; Coffman, MJ; Thomas, ML	BMC HEALTH SERVICES RESEARCH	2018	10.1186/s12913-018-3082-1	WOS
The Effect of Spatial Access to Primary Care on Potentially Avoidable Hospitalizations of the Elderly: Evidence from Chishui City, China	Chen, T; Pan, J	SOCIAL INDICATORS RESEARCH		10.1007/s11205-020-02413-9	WOS
The effect of the global financial crisis on preventable hospitalizations among the homeless in New York State	White B, Ellis C, Jones W, Moran W, Simpson K.	J Health Serv Res Policy	2018	10.1177/1355819617742180	PubMed
The effect of the global financial crisis on preventable hospitalizations among the homeless in New York State	White, B., Ellis, C., Jones, W., Moran, W., Simpson, K.	Journal of Health Services Research and Policy	2018	10.1177/1355819617742180	Scopus
The effect of the global financial crisis on preventable hospitalizations among the homeless in New York State	White, B; Ellis, C; Jones, W; Moran, W; Simpson, K	JOURNAL OF HEALTH SERVICES RESEARCH & POLICY	2018	10.1177/1355819617742180	WOS
The effectiveness of the South African Triage Score (SATS) in a rural emergency department	Rosedale K, Smith ZA, Davies H, Wood D.	S Afr Med J	2011		PubMed
The effectiveness of the South African triage score (SATS) in a rural emergency department	Rosedale, K., Smith, Z.A., Davies, H., Wood, D.	South African Medical Journal	2011		Scopus
The effectiveness of the South African Triage Score (SATS) in a rural emergency department	Rosedale, K; Smith, ZA; Davies, H; Wood, D	SAMJ SOUTH AFRICAN MEDICAL JOURNAL	2011		WOS
The effects of a people-centred model on longitudinality of care and utilization pattern of healthcare services-Brazilian evidence	Ferrer, APS; Brentani, AVM; Sucupira, ACSL; Navega, ACB; Cerqueira, ES; Grisi, SJFE	HEALTH POLICY AND PLANNING	2014	10.1093/heapol/czu077	WOS
The effects of a variant of the program for all-inclusive care of the elderly on hospital utilization and outcomes	Kane RL, Homyak P, Bershadsky B, Flood S.	J Am Geriatr Soc	2006	10.1111/j.1532-5415.2005.00581.x	PubMed
The effects of a variant of the program for all-inclusive care of the elderly on hospital utilization and outcomes	Kane, R.L., Homyak, P., Bershadsky, B., Flood, S.	Journal of the American Geriatrics Society	2006	10.1111/j.1532-5415.2005.00581.x	Scopus
The effects of a variant of the program for all-inclusive care of the elderly on hospital utilization and outcomes	Kane, RL; Homyak, P; Bershadsky, B; Flood, S	JOURNAL OF THE AMERICAN GERIATRICS SOCIETY	2006	10.1111/j.1532-5415.2005.00581.x	WOS
The Effects of Global Budgeting on Emergency Department Admission Rates in Maryland	Galarraga JE, Black B, Pimentel L, Venkat A, Sverha JP, Frohna WJ, Lemkin DL, Pines JM.	Ann Emerg Med	2020	10.1016/j.annemergmed.2019.06.009	PubMed
The Effects of Global Budgeting on Emergency Department Admission Rates in Maryland	Galarraga, J.E., Black, B., Pimentel, L., Venkat, A., Sverha, J.P., Frohna, W.J., Lemkin, D.L., Pines, J.M.	Annals of Emergency Medicine	2020	10.1016/j.annemergmed.2019.06.009	Scopus
The Effects of Global Budgeting on Emergency Department Admission Rates in Maryland	Galarraga, JE; Black, B; Pimentel, L; Venkat, A; Sverha, JP; Frohna, WJ; Lemkin, DL; Pines, JM	ANNALS OF EMERGENCY MEDICINE	2020	10.1016/j.annemergmed.2019.06.009	WOS
The Epidemiology of Emergency In-Patient Hospitalisations Among Those with 'No Fixed Abode' (Homeless) 2005-2014: What Lessons Can Be Learnt	O'Farrell A, Evans DS, Allen M.	Ir Med J	2016		PubMed
The epidemiology of emergency in-patient hospitalisations among those with ‘no fixed abode’ (Homeless) 2005-2014: What lessons can be learnt	O’Farrell, A., Evans, D.S., Allen, M.	Irish Medical Journal	2016		Scopus
The formation and design of the TRIAGE study - Baseline data on 6005 consecutive patients admitted to hospital from the emergency department	Plesner, L.L., Iversen, A.K.S., Langkjaer, S., Nielsen, T.L., Østervig, R., Warming, P.E., Salam, I.A., Kristensen, M., Schou, M., Eugen-Olsen, J., Forberg, J.L., Køber, L., Rasmussen, L.S., Sölétormos, G., Pedersen, B.K., Iversen, K.	Scandinavian Journal of Trauma, Resuscitation and Emergency Medicine	2015	10.1186/s13049-015-0184-1	Scopus
The formation and design of the TRIAGE study - baseline data on 6005 consecutive patients admitted to hospital from the emergency department	Plesner, LL; Iversen, AKS; Langkjaer, S; Nielsen, TL; Ostervig, R; Warming, PE; Salam, IA; Kristensen, M; Schou, M; Eugen-Olsen, J; Forberg, JL; Kober, L; Rasmussen, LS; Soletormos, G; Pedersen, BK; Iversen, K	SCANDINAVIAN JOURNAL OF TRAUMA RESUSCITATION & EMERGENCY MEDICINE	2015	10.1186/s13049-015-0184-1	WOS
The frequency of and reasons for acute hospital transfers of older nursing home residents	Kirsebom M, Hedström M, Wadensten B, Pöder U.	Arch Gerontol Geriatr	2014	10.1016/j.archger.2013.08.002	PubMed
The frequency of and reasons for acute hospital transfers of older nursing home residents	Kirsebom, M., Hedström, M., Wadensten, B., Pöder, U.	Archives of Gerontology and Geriatrics	2014	10.1016/j.archger.2013.08.002	Scopus
The frequency of and reasons for acute hospital transfers of older nursing home residents	Kirsebom, M; Hedstrom, M; Wadensten, B; Poder, U	ARCHIVES OF GERONTOLOGY AND GERIATRICS	2014	10.1016/j.archger.2013.08.002	WOS
The Golden Letter: Innovation Collaboration to Reduce Avoidable Hospital Admissions	Nanavati M, Saenz S, Swayne K, Carek P.	J Am Board Fam Med	2020	10.3122/jabfm.2020.06.200077	PubMed
The Golden Letter: Innovation Collaboration to Reduce Avoidable Hospital Admissions	Nanavati, M., Saenz, S., Swayne, K., Carek, P.	Journal of the American Board of Family Medicine	2020	10.3122/jabfm.2020.06.200077	Scopus
The Golden Letter: Innovation Collaboration to Reduce Avoidable Hospital Admissions	Nanavati, M; Saenz, S; Swayne, K; Carek, P	JOURNAL OF THE AMERICAN BOARD OF FAMILY MEDICINE	2020	10.3122/jabfm.2020.06.200077	WOS
The hospital care of patients with cancer: a retrospective analysis of the characteristics of their hospital stay in comparison with other medical conditions	Numico, G; Zanelli, C; Ippoliti, R; Rossi, M; Traverso, E; Antonuzzo, A; Bellini, R	EUROPEAN JOURNAL OF CANCER	2020	10.1016/j.ejca.2020.08.023	WOS
The impact of COVID-19 on hospital admissions and emergency department visits: A population-based study	Rennert-May E, Leal J, Thanh NX, Lang E, Dowling S, Manns B, Wasylak T, Ronksley PE.	PLoS One	2021	10.1371/journal.pone.0252441	PubMed
The impact of COVID-19 on hospital admissions and emergency department visits: A population-based study	Rennert-May, E., Leal, J., Thanh, N.X., Lang, E., Dowling, S., Manns, B., Wasylak, T., Ronksley, P.E.	PLoS ONE	2021	10.1371/journal.pone.0252441	Scopus
The impact of COVID-19 on hospital admissions and emergency department visits: A population-based study	Rennert-May, E; Leal, J; Thanh, NX; Lang, E; Dowling, S; Manns, B; Wasylak, T; Ronksley, PE	PLOS ONE	2021	10.1371/journal.pone.0252441	WOS
The impact of quality and accessibility of primary care on emergency admissions for a range of chronic ambulatory care sensitive conditions (ACSCs) in Scotland: longitudinal analysis	van der Pol M, Olajide D, Dusheiko M, Elliott R, Guthrie B, Jorm L, Leyland AH.	BMC Fam Pract	2019	10.1186/s12875-019-0921-z	PubMed
The impact of quality and accessibility of primary care on emergency admissions for a range of chronic ambulatory care sensitive conditions (ACSCs) in Scotland: Longitudinal analysis	Van Der Pol, M., Olajide, D., Dusheiko, M., Elliott, R., Guthrie, B., Jorm, L., Leyland, A.H.	BMC Family Practice	2019	10.1186/s12875-019-0921-z	Scopus
The impact of quality and accessibility of primary care on emergency admissions for a range of chronic ambulatory care sensitive conditions (ACSCs) in Scotland: longitudinal analysis	van der Pol, M; Olajide, D; Dusheiko, M; Elliott, R; Guthrie, B; Jorm, L; Leyland, AH	BMC FAMILY PRACTICE	2019	10.1186/s12875-019-0921-z	WOS
The influence of primary care quality on hospital admissions for people with dementia in England: a regression analysis	Kasteridis P, Mason AR, Goddard MK, Jacobs R, Santos R, McGonigal G.	PLoS One	2015	10.1371/journal.pone.0121506	PubMed
The influence of primary care quality on hospital admissions for people with dementia in England: A regression analysis	Kasteridis, P., Mason, A.R., Goddard, M.K., Jacobs, R., Santos, R., McGonigal, G.	PLoS ONE	2015	10.1371/journal.pone.0121506	Scopus
The Influence of Primary Care Quality on Hospital Admissions for People with Dementia in England: A Regression Analysis	Kasteridis, P; Mason, AR; Goddard, MK; Jacobs, R; Santos, R; McGonigal, G	PLOS ONE	2015	10.1371/journal.pone.0121506	WOS
The INITIATE trial protocol: a randomized controlled trial testing the effectiveness of a "quit card" intervention on long-term abstinence among tobacco smokers presenting to the emergency department	Mullen KA, Garg A, Gagnon F, Wells G, Kapur A, Hawken S, Pipe AL, Walker K, Thiruganasambandamoorthy V, Klepaczek M, Reid RD.	Trials	2021	10.1186/s13063-021-05693-9	PubMed
The INITIATE trial protocol: a randomized controlled trial testing the effectiveness of a “quit card” intervention on long-term abstinence among tobacco smokers presenting to the emergency department	Mullen, K.A., Garg, A., Gagnon, F., Wells, G., Kapur, A., Hawken, S., Pipe, A.L., Walker, K., Thiruganasambandamoorthy, V., Klepaczek, M., Reid, R.D.	Trials	2021	10.1186/s13063-021-05693-9	Scopus
The INITIATE trial protocol: a randomized controlled trial testing the effectiveness of a quit card intervention on long-term abstinence among tobacco smokers presenting to the emergency department	Mullen, KA; Garg, A; Gagnon, F; Wells, G; Kapur, A; Hawken, S; Pipe, AL; Walker, K; Thiruganasambandamoorthy, V; Klepaczek, M; Reid, RD	TRIALS	2021	10.1186/s13063-021-05693-9	WOS
The interdisciplinary approach to the implementation of a diabetes home care disease management program	Rosa MA, Lapides S, Hayden C, Santangelo R.	Home Healthc Nurse	2014	10.1097/NHH.0000000000000022	PubMed
The interdisciplinary approach to the implementation of a diabetes home care disease management program	Rosa, M.A., Lapides, S., Hayden, C., Santangelo, R.	Home Healthcare Nurse	2014	10.1097/NHH.0000000000000022	Scopus
The magic number: Are improved outcomes observed at trauma centers with undertriage rates below 5%?	Jammula, S., Bradburn, E.H., Gross, B.W., Cook, A.D., Reihart, M.J., Rogers, F.B.	Journal of Trauma and Acute Care Surgery	2018	10.1097/TA.0000000000002002	Scopus
The Maryland Health Enterprise Zone Initiative Reduced Hospital Cost And Utilization In Underserved Communities	Gaskin DJ, Vazin R, McCleary R, Thorpe RJ Jr.	Health Aff (Millwood)	2018	10.1377/hlthaff.2018.0642	PubMed
The Maryland health enterprise zone initiative reduced hospital cost and utilization in underserved communities	Gaskin, D.J., Vazin, R., McCleary, R., Thorpe, R.J.	Health Affairs	2018	10.1377/hlthaff.2018.0642	Scopus
The Maryland Health Enterprise Zone Initiative Reduced Hospital Cost And Utilization In Underserved Communities	Gaskin, DJ; Vazin, R; McCleary, R; Thorpe, RJ	HEALTH AFFAIRS	2018	10.1377/hlthaff.2018.0642	WOS
The Medical Home Initiative in Italy: an Analysis of Changes in Healthcare Utilization	Keith SW, Waters D, Alcusky M, Hegarty S, Jafari N, Lombardi M, Pini M, Maio V.	J Gen Intern Med	2021	10.1007/s11606-021-07040-9	PubMed
The Medical Home Initiative in Italy: an Analysis of Changes in Healthcare Utilization	Keith, S.W., Waters, D., Alcusky, M., Hegarty, S., Jafari, N., Lombardi, M., Pini, M., Maio, V.	Journal of General Internal Medicine	2021	10.1007/s11606-021-07040-9	Scopus
The Medical Home Initiative in Italy: an Analysis of Changes in Healthcare Utilization	Keith, SW; Waters, D; Alcusky, M; Hegarty, S; Jafari, N; Lombardi, M; Pini, M; Maio, V	JOURNAL OF GENERAL INTERNAL MEDICINE		10.1007/s11606-021-07040-9	WOS
The missing link: improving quality with a chronic disease management intervention for the primary care office	Zweifler J.	Ann Fam Med	2007	10.1370/afm.745	PubMed
The missing link: Improving quality with a chronic disease management intervention for the primary care office	Zweifler, J.	Annals of Family Medicine	2007	10.1370/afm.745	Scopus
The missing link: Improving quality with a chronic disease management intervention for the primary care office	Zweifler, J	ANNALS OF FAMILY MEDICINE	2007	10.1370/afm.745	WOS
The quality of care under a managed-care program for dual eligibles	Kane RL, Homyak P, Bershadsky B, Lum T, Flood S, Zhang H.	Gerontologist	2005	10.1093/geront/45.4.496	PubMed
The quality of care under a managed-care program for dual eligibles	Kane, R.L., Homyak, P., Bershadsky, B., Lum, T., Flood, S., Zhang, H.	Gerontologist	2005	10.1093/geront/45.4.496	Scopus
The quality of care under a managed-care program for dual eligibles	Kane, RL; Homyak, P; Bershadsky, B; Lum, T; Flood, S; Zhang, H	GERONTOLOGIST	2005	10.1093/geront/45.4.496	WOS
The quality of primary care provided by nurse practitioners to vulnerable Medicare beneficiaries	DesRoches, CM; Clarke, S; Perloff, J; O'Reilly-Jacob, M; Buerhaus, P	NURSING OUTLOOK	2017	10.1016/j.outlook.2017.06.007	WOS
The recognition and initial management of diabetic acidosis	Zimmet, P.Z.	Australian Family Physician	1974		Scopus
The Relationship Between Rural Health Clinic Use and Potentially Preventable Hospitalizations and Emergency Department Visits Among Medicare Beneficiaries	Wright B, Potter AJ, Trivedi AN, Mueller KJ.	J Rural Health	2018	10.1111/jrh.12253	PubMed
The Relationship Between Rural Health Clinic Use and Potentially Preventable Hospitalizations and Emergency Department Visits Among Medicare Beneficiaries	Wright, B., Potter, A.J., Trivedi, A.N., Mueller, K.J.	Journal of Rural Health	2018	10.1111/jrh.12253	Scopus
The Relationship Between Rural Health Clinic Use and Potentially Preventable Hospitalizations and Emergency Department Visits Among Medicare Beneficiaries	Wright, B; Potter, AJ; Trivedi, AN; Mueller, KJ	JOURNAL OF RURAL HEALTH	2018	10.1111/jrh.12253	WOS
The relationship of lactate levels with carboxyhemoglobin levels and clinical findings in patients admitted with acute carbon monoxide poisoning [Akut karbon monoksit zehirlenmesiyle başvuran hastaların laktat düzeyinin karboksihemoglobin ve klinik bulgularla ilişkisi]	Usul, E., Halici, A., Höke, M.H.	Duzce Medical Journal	2021	10.18678/dtfd.844904	Scopus
The Role of Mental Health Disease in Potentially Preventable Hospitalizations	Medford-Davis, L.N., Shah, R., Kennedy, D., Becker, E.	Medical Care	2018	10.1097/MLR.0000000000000845	Scopus
The role of social isolation in frequent and/or avoidable hospitalisation: rural community-based service providers' perspectives	Longman, J; Passey, M; Singer, J; Morgan, G	AUSTRALIAN HEALTH REVIEW	2013	10.1071/AH12152	WOS
The Role of the US Trauma Centers in Older Adult Fall Prevention: A National Survey	Allee L, Faul M, Guntipalli P, Burke PA, Rao SR, Reed DN Jr, Gross R, Duncan TK, Palmieri TL, Cooper Z, Bulger EM, Stewart RM, Kuhls DA.	Am Surg	2021	10.1177/00031348211047509	PubMed
The Role of the US Trauma Centers in Older Adult Fall Prevention: A National Survey	Allee, L., Faul, M., Guntipalli, P., Burke, P.A., Rao, S.R., Reed, D.N., Gross, R., Duncan, T.K., Palmieri, T.L., Cooper, Z., Bulger, E.M., Stewart, R.M., Kuhls, D.A.	American Surgeon	2021	10.1177/00031348211047509	Scopus
The Role of the US Trauma Centers in Older Adult Fall Prevention: A National Survey	Allee, L; Faul, M; Guntipalli, P; Burke, PA; Rao, SWR; Reed, DN; Gross, R; Duncan, TK; Palmieri, TL; Cooper, Z; Bulger, EM; Stewart, RM; Kuhls, DA	AMERICAN SURGEON		10.1177/00031348211047509	WOS
The Safety and Effectiveness of On-Site Paramedic and Allied Health Treatment Interventions Targeting the Reduction of Emergency Department Visits by Long-Term Care Patients: Systematic Review	Leduc, S; Cantor, Z; Kelly, P; Thiruganasambandamoorthy, V; Wells, G; Vaillancourt, C	PREHOSPITAL EMERGENCY CARE	2021	10.1080/10903127.2020.1794084	WOS
The Victorian ambulatory care sensitive conditions study: rural and urban perspectives	Ansari Z, Barbetti T, Carson NJ, Auckland MJ, Cicuttini F.	Soz Praventivmed	2003	10.1007/s000380300004	PubMed
The Victorian ambulatory care sensitive conditions study: Rural and urban perspectives	Ansari, Z., Barbetti, T., Carson, N.J., Auckland, M.J., Cicuttini, F.	Sozial- und Praventivmedizin	2003	10.1007/s000380300004	Scopus
The Victorian ambulatory care sensitive conditions study: rural and urban perspectives	Ansari, Z; Barbetti, T; Carson, NJ; Auckland, MJ; Cicuttini, FM	SOZIAL-UND PRAVENTIVMEDIZIN	2003	10.1007/s000380300004	WOS
The widening black/white gap in asthma hospitalizations and mortality	Gupta, RS; Carrion-Carire, V; Weiss, KB	JOURNAL OF ALLERGY AND CLINICAL IMMUNOLOGY	2006	10.1016/j.jaci.2005.11.047	WOS
They Don't Trust Us: The Influence of Perceptions of Inadequate Nursing Home Care on Emergency Department Transfers and the Potential Role for Telehealth	Stephens, CE; Halifax, E; David, D; Bui, N; Lee, SJ; Shim, J; Ritchie, CS	CLINICAL NURSING RESEARCH	2020	10.1177/1054773819835015	WOS
Transfer of nursing home residents to emergency departments: organizational differences between nursing homes with high vs. low transfer rates	Kirsebom M, Hedström M, Pöder U, Wadensten B.	Nurs Open	2016	10.1002/nop2.68	PubMed
Transfer of nursing home residents to emergency departments: Organizational differences between nursing homes with high vs. low transfer rates	Kirsebom, M., Hedström, M., Pöder, U., Wadensten, B.	Nursing Open	2017	10.1002/nop2.68	Scopus
Transfer of nursing home residents to emergency departments: organizational differences between nursing homes with high vs. low transfer rates	Kirsebom, M; Hedstrom, M; Poder, U; Wadensten, B	NURSING OPEN	2017	10.1002/nop2.68	WOS
Transitions through postacute and long-term care settings - Patterns of use and outcomes for a national cohort of elders	Murtaugh, CM; Litke, A	MEDICAL CARE	2002		WOS
Transplant-related strongyloidiasis in solid organ transplant recipients in Saudi Arabia and the Gulf Cooperation Council countries	Elzein, F., Albahili, H., Bahloul, A., Alonazi, T., Alghamdi, A., Alsufyani, E., Musa, A., Alsaeed, M.	International Journal of Infectious Diseases	2020	10.1016/j.ijid.2020.01.032	Scopus
Transportation Brokerage Services and Medicaid Beneficiaries' Access to Care	Kim, J; Norton, EC; Stearns, SC	HEALTH SERVICES RESEARCH	2009	10.1111/j.1475-6773.2008.00907.x	WOS
Trauma outcomes for blunt and penetrating injuries by mode of transportation and day/night shift	Sutherland M, Ehrlich H, McKenney M, Elkbuli A.	Am J Emerg Med	2021	10.1016/j.ajem.2021.04.012	PubMed
Trauma outcomes for blunt and penetrating injuries by mode of transportation and day/night shift	Sutherland, M., Ehrlich, H., McKenney, M., Elkbuli, A.	American Journal of Emergency Medicine	2021	10.1016/j.ajem.2021.04.012	Scopus
Trauma outcomes for blunt and penetrating injuries by mode of transportation and day/night shift	Sutherland, M; Ehrlich, H; McKenney, M; Elkbuli, A	AMERICAN JOURNAL OF EMERGENCY MEDICINE	2021	10.1016/j.ajem.2021.04.012	WOS
Travel distances, socioeconomic characteristics, and health disparities in nonurgent and frequent use of Hospital Emergency Departments in South Carolina: a population-based observational study	Chen BK, Cheng X, Bennett K, Hibbert J.	BMC Health Serv Res	2015	10.1186/s12913-015-0864-6	PubMed
Travel distances, socioeconomic characteristics, and health disparities in nonurgent and frequent use of Hospital Emergency Departments in South Carolina: A population-based observational study	Chen, B.K., Cheng, X., Bennett, K., Hibbert, J.	BMC Health Services Research	2015	10.1186/s12913-015-0864-6	Scopus
Travel distances, socioeconomic characteristics, and health disparities in nonurgent and frequent use of Hospital Emergency Departments in South Carolina: a population-based observational study	Chen, BK; Cheng, X; Bennett, K; Hibbert, J	BMC HEALTH SERVICES RESEARCH	2015	10.1186/s12913-015-0864-6	WOS
Treating in Place: Acute Care for Long-Stay Residents in Nursing Facilities Under a CMS Initiative	Segelman, M., Ingber, M.J., Feng, Z., Khatutsky, G., Bercaw, L., Gasdaska, A., Huber, B., Voltmer, H.	Journal of the American Geriatrics Society	2021	10.1111/jgs.16901	Scopus
Treatment provider is most predictive of ED dismissal in minimally-injured trauma patients: a retrospective review	Hunt DL, Berg GM, Zackula RE, Ekengren FH, Lippoldt D, Ablah E, Wetta R.	J Trauma Manag Outcomes	2013	10.1186/1752-2897-7-5	PubMed
Treatment provider is most predictive of ED dismissal in minimally-injured trauma patients: A retrospective review	Hunt, D.L.S., Berg, G.M., Zackula, R.E., Ekengren, F.H., Lippoldt, D., Ablah, E., Wetta, R.	Journal of Trauma Management and Outcomes	2013	10.1186/1752-2897-7-5	Scopus
Trend of severe abdominal injuries from bicycle accidents in children: a preventable condition	Muthucumaru M, Keys C, Kimber C, Ferguson P, Varma P, Cheng W.	J Paediatr Child Health	2012	10.1111/j.1440-1754.2011.02233.x	PubMed
Trend of severe abdominal injuries from bicycle accidents in children: A preventable condition	Muthucumaru, M., Keys, C., Kimber, C., Ferguson, P., Varma, P., Cheng, W.	Journal of Paediatrics and Child Health	2012	10.1111/j.1440-1754.2011.02233.x	Scopus
Trend of severe abdominal injuries from bicycle accidents in children: A preventable condition	Muthucumaru, M; Keys, C; Kimber, C; Ferguson, P; Varma, P; Cheng, W	JOURNAL OF PAEDIATRICS AND CHILD HEALTH	2012	10.1111/j.1440-1754.2011.02233.x	WOS
Trends and characteristics of US emergency department visits, 1997-2007	Tang N, Stein J, Hsia RY, Maselli JH, Gonzales R.	JAMA	2010	10.1001/jama.2010.1112	PubMed
Trends and characteristics of US emergency department visits, 1997-2007	Tang, N., Stein, J., Hsia, R.Y., Maselli, J.H., Gonzales, R.	JAMA - Journal of the American Medical Association	2010	10.1001/jama.2010.1112	Scopus
Trends and Characteristics of US Emergency Department Visits, 1997-2007	Tang, N; Stein, J; Hsia, RY; Maselli, JH; Gonzales, R	JAMA-JOURNAL OF THE AMERICAN MEDICAL ASSOCIATION	2010	10.1001/jama.2010.1112	WOS
Trends and predictors of hospitalization after emergency department asthma visits among U.S. Adults, 2006-2014	Lin MP, Vargas-Torres C, Schuur JD, Shi D, Wisnivesky J, Richardson LD.	J Asthma	2020	10.1080/02770903.2019.1621889	PubMed
Trends and predictors of hospitalization after emergency department asthma visits among U.S. Adults, 2006–2014	Lin, M.P., Vargas-Torres, C., Schuur, J.D., Shi, D., Wisnivesky, J., Richardson, L.D.	Journal of Asthma	2020	10.1080/02770903.2019.1621889	Scopus
Trends and predictors of hospitalization after emergency department asthma visits among US Adults, 2006-2014	Lin, MP; Vargas-Torres, C; Schuur, JD; Shi, D; Wisnivesky, J; Richardson, LD	JOURNAL OF ASTHMA	2020	10.1080/02770903.2019.1621889	WOS
Trends in Emergency Department Use by Rural and Urban Populations in the United States	Greenwood-Ericksen MB, Kocher K.	JAMA Netw Open	2019	10.1001/jamanetworkopen.2019.1919	PubMed
Trends in Emergency Department Use by Rural and Urban Populations in the United States	Greenwood-Ericksen, M.B., Kocher, K.	JAMA network open	2019	10.1001/jamanetworkopen.2019.1919	Scopus
Trends in Emergency Department Use by Rural and Urban Populations in the United States	Greenwood-Ericksen, MB; Kocher, K	JAMA NETWORK OPEN	2019	10.1001/jamanetworkopen.2019.1919	WOS
Trends in emergency department visits for ambulatory care sensitive conditions by elderly nursing home residents, 2001 to 2010	Brownell J, Wang J, Smith A, Stephens C, Hsia RY.	JAMA Intern Med	2014	10.1001/jamainternmed.2013.11821	PubMed
Trends in emergency department visits for ambulatory care sensitive conditions by elderly nursing home residents, 2001 to 2010	Brownell, J., Wang, J., Smith, A., Stephens, C., Hsia, R.Y.	JAMA Internal Medicine	2014	10.1001/jamainternmed.2013.11821	Scopus
Trends in Emergency Department Visits for Ambulatory Care Sensitive Conditions by Elderly Nursing Home Residents, 2001 to 2010	Brownell, J; Wang, J; Smith, A; Stephens, C; Hsia, RY	JAMA INTERNAL MEDICINE	2014	10.1001/jamainternmed.2013.11821	WOS
Trends in health service use and potentially avoidable hospitalizations before Alzheimer's disease diagnosis: A matched, retrospective study of US Medicare beneficiaries	Desai U, Kirson NY, Ye W, Mehta NR, Wen J, Andrews JS.	Alzheimers Dement (Amst)	2019	10.1016/j.dadm.2018.12.005	PubMed
Trends in health service use and potentially avoidable hospitalizations before Alzheimer's disease diagnosis: A matched, retrospective study of US Medicare beneficiaries	Desai, U., Kirson, N.Y., Ye, W., Mehta, N.R., Wen, J., Andrews, J.S.	Alzheimer's and Dementia: Diagnosis, Assessment and Disease Monitoring	2019	10.1016/j.dadm.2018.12.005	Scopus
Trends in health service use and potentially avoidable hospitalizations before Alzheimer's disease diagnosis: A matched, retrospective study of US Medicare beneficiaries	Desai, U; Kirson, NY; Ye, WY; Mehta, NR; Wen, J; Andrews, JS	ALZHEIMER'S & DEMENTIA: DIAGNOSIS, ASSESSMENT & DISEASE MONITORING	2019	10.1016/j.dadm.2018.12.005	WOS
Trends in heart failure hospitalizations	Fida N, Piña IL.	Curr Heart Fail Rep	2012	10.1007/s11897-012-0117-5	PubMed
Trends in heart failure hospitalizations	Fida, N., Piña, I.L.	Current Heart Failure Reports	2012	10.1007/s11897-012-0117-5	Scopus
Trends in potentially avoidable hospitalizations among adults in Tennessee, 1998-2006	Chang CF, Troyer JL.	Tenn Med	2011		PubMed
Trends in potentially avoidable hospitalizations among adults in Tennessee, 1998-2006.	Chang, C.F., Troyer, J.L.	Tennessee medicine : journal of the Tennessee Medical Association	2011		Scopus
Trends in Potentially Preventable Inpatient Hospital Admissions and Emergency Department Visits: Statistical Brief #195	Fingar KR, Barrett ML, Elixhauser A, Stocks C, Steiner CA.	Healthcare Cost and Utilization Project (HCUP) Statistical Briefs	2006		PubMed
Trends of chronic illness in emergency department admissions among elderly adults in a tertiary hospital over ten years	Hu Z, Siddiqui FJ, Fan Q, Lian SWQ, Liu N, Ong MEH.	BMC Health Serv Res	2021	10.1186/s12913-021-07309-z	PubMed
Trends of chronic illness in emergency department admissions among elderly adults in a tertiary hospital over ten years	Hu, Z., Siddiqui, F.J., Fan, Q., Lian, S.W.Q., Liu, N., Ong, M.E.H.	BMC Health Services Research	2021	10.1186/s12913-021-07309-z	Scopus
Trends of chronic illness in emergency department admissions among elderly adults in a tertiary hospital over ten years	Hu, ZX; Siddiqui, FJ; Fan, Q; Lian, SWQ; Liu, N; Ong, MEH	BMC HEALTH SERVICES RESEARCH	2021	10.1186/s12913-021-07309-z	WOS
Trends of social networks in the American College of Surgeons Clinical Congress and the Congreso Nacional de Cirugía. Analysis of the #ACSCC20 and #CNCirugia2020	Sanchez-Cordero S, Morales-Conde S, Sánchez Santos R, Rubio Perez I, Farré Font R, Ramos Rodriguez JL, Balibrea Del Castillo JM, Mayol J.	Cir Esp (Engl Ed)	2021	10.1016/j.ciresp.2021.04.022	PubMed
Trends of social networks in the American College of Surgeons Clinical Congress and the Congreso Nacional de Cirugía. Analysis of the #ACSCC20 and #CNCirugia2020 [Resultados y evolución histórica de las redes sociales en el American College of Surgeons Clinical Congress y el Congreso Nacional de Cirugía. Análisis del #ACSCC20 y #CNCirugia2020]	Sanchez-Cordero, S., Morales-Conde, S., Sánchez Santos, R., Rubio Perez, I., Farré Font, R., Ramos Rodriguez, J.L., Balibrea del Castillo, J.M., Mayol, J.	Cirugia Espanola	2021	10.1016/j.ciresp.2021.04.022	Scopus
Triumph of hope over experience: learning from interventions to reduce avoidable hospital admissions identified through an Academic Health and Social Care Network	Woodhams V, de Lusignan S, Mughal S, Head G, Debar S, Desombre T, Hilton S, Al Sharifi H.	BMC Health Serv Res	2012	10.1186/1472-6963-12-153	PubMed
Triumph of hope over experience: Learning from interventions to reduce avoidable hospital admissions identified through an academic health and social care network	Woodhams, V., De Lusignan, S., Mughal, S., Head, G., Debar, S., Desombre, T., Hilton, S., Al Sharifi, H.	BMC Health Services Research	2012	10.1186/1472-6963-12-153	Scopus
Triumph of hope over experience: learning from interventions to reduce avoidable hospital admissions identified through an Academic Health and Social Care Network	Woodhams, V; de Lusignan, S; Mughal, S; Head, G; Debar, S; Desombre, T; Hilton, S; Al Sharifi, H	BMC HEALTH SERVICES RESEARCH	2012	10.1186/1472-6963-12-153	WOS
Two Innovative Cancer Care Programs Have Potential to Reduce Utilization and Spending	Colligan, EM; Ewald, E; Keating, NL; Parashuram, S; Spafford, M; Ruiz, S; Moiduddin, A	MEDICAL CARE	2017	10.1097/MLR.0000000000000795	WOS
Underestimated impact of antibiotic misuse in outpatient children	Cassir, N; Di Marco, JN; Poujol, A; Lagier, JC	ARCHIVES DE PEDIATRIE	2012	10.1016/j.arcped.2012.03.012	WOS
Underestimated impact of antibiotic misuse in outpatient children [Prescriptions inappropriées d'antibiotiques chez l'enfant en médecine de ville : Raisons et conséquences]	Cassir, N., Di Marco, J.-N., Poujol, A., Lagier, J.-C.	Archives de Pediatrie	2012	10.1016/j.arcped.2012.03.012	Scopus
Understanding the Characteristics of Frequent Users of Emergency Departments: What Role Do Medical Conditions Play?	Rauch J, Hüsers J, Babitsch B, Hübner U.	Stud Health Technol Inform	2018		PubMed
Understanding the Characteristics of Frequent Users of Emergency Departments: What Role Do Medical Conditions Play?	Rauch, J., Hüsers, J., Babitsch, B., Hübner, U.	Studies in health technology and informatics	2018		Scopus
Understanding the use and impact of allied health services for people with chronic health conditions in Central and Eastern Sydney, Australia: a five-year longitudinal analysis	Barr ML, Welberry H, Comino EJ, Harris-Roxas BF, Harris E, Lloyd J, Whitney S, O'Connor C, Hall J, Harris MF.	Prim Health Care Res Dev	2019	10.1017/S146342361900077X	PubMed
Understanding the use and impact of allied health services for people with chronic health conditions in Central and Eastern Sydney, Australia: a five-year longitudinal analysis	Barr, M.L., Welberry, H., Comino, E.J., Harris-Roxas, B.F., Harris, E., Lloyd, J., Whitney, S., O'Connor, C., Hall, J., Harris, M.F.	Primary health care research &amp; development	2019	10.1017/S146342361900077X	Scopus
Understanding the use and impact of allied health services for people with chronic health conditions in Central and Eastern Sydney, Australia: a five-year longitudinal analysis	Barr, ML; Welberry, H; Comino, EJ; Harris-Roxas, BF; Harris, E; Lloyd, J; Whitney, S; O'Connor, C; Hall, J; Harris, MF	PRIMARY HEALTH CARE RESEARCH AND DEVELOPMENT	2019	10.1017/S146342361900077X	WOS
Unfavorable Socioeconomic Factors Underlie High Rates of Hospitalization for Complicated Thyrotoxicosis in Some Regions of the United States	Rivas AM, Larumbe E, Thavaraputta S, Juarez E, Adiga A, Lado-Abeal J.	Thyroid	2019	10.1089/thy.2018.0353	PubMed
Unfavorable socioeconomic factors underlie high rates of hospitalization for complicated thyrotoxicosis in some regions of the United States	Rivas, A.M., Larumbe, E., Thavaraputta, S., Juarez, E., Adiga, A., Lado-Abeal, J.	Thyroid	2019	10.1089/thy.2018.0353	Scopus
Unfavorable Socioeconomic Factors Underlie High Rates of Hospitalization for Complicated Thyrotoxicosis in Some Regions of the United States	Rivas, AM; Larumbe, E; Thavaraputta, S; Juarez, E; Adiga, A; Lado-Abeal, J	THYROID	2019	10.1089/thy.2018.0353	WOS
Unplanned Transfer to Emergency Departments for Frail Elderly Residents of Aged Care Facilities: A Review of Patient and Organizational Factors	Dwyer, R; Stoelwinder, J; Gabbe, B; Lowthian, J	JOURNAL OF THE AMERICAN MEDICAL DIRECTORS ASSOCIATION	2015	10.1016/j.jamda.2015.03.007	WOS
Up-skilling associate clinicians in Malawi in emergency obstetric, neonatal care and clinical leadership: the ETATMBA cluster randomised controlled trial	Ellard DR, Chimwaza W, Davies D, Simkiss D, Kamwendo F, Mhango C, Quenby S, Kandala NB, O'Hare JP.	BMJ Glob Health	2016	10.1136/bmjgh-2015-000020	PubMed
Use of Federally Qualified Health Centers and Potentially Preventable Hospital Utilization Among Older Medicare-Medicaid Enrollees	Wright, B; Potter, AJ; Trivedi, AN	JOURNAL OF AMBULATORY CARE MANAGEMENT	2017	10.1097/JAC.0000000000000158	WOS
Use of health services in the last year of life and cause of death in people with intellectual disability: a retrospective matched cohort study	Brameld K, Spilsbury K, Rosenwax L, Leonard H, Semmens J.	BMJ Open	2018	10.1136/bmjopen-2017-020268	PubMed
Use of health services in the last year of life and cause of death in people with intellectual disability: A retrospective matched cohort study	Brameld, K., Spilsbury, K., Rosenwax, L., Leonard, H., Semmens, J.	BMJ Open	2018	10.1136/bmjopen-2017-020268	Scopus
Use of health services in the last year of life and cause of death in people with intellectual disability: a retrospective matched cohort study	Brameld, K; Spilsbury, K; Rosenwax, L; Leonard, H; Semmens, J	BMJ OPEN	2018	10.1136/bmjopen-2017-020268	WOS
Use of the health care system by Ontario First Nations people with diabetes: a population-based study	Shah BR, Slater M, Frymire E, Jacklin K, Sutherland R, Khan S, Walker JD, Green ME.	CMAJ Open	2020	10.9778/cmajo.20200043	PubMed
Using hospitalization for ambulatory care sensitive conditions to measure access to primary health care: an application of spatial structural equation modeling	Hossain MM, Laditka JN.	Int J Health Geogr	2009	10.1186/1476-072X-8-51	PubMed
Using hospitalization for ambulatory care sensitive conditions to measure access to primary health care: An application of spatial structural equation modeling	Hossain, M.M., Laditka, J.N.	International Journal of Health Geographics	2009	10.1186/1476-072X-8-51	Scopus
Using hospitalization for ambulatory care sensitive conditions to measure access to primary health care: an application of spatial structural equation modeling	Hossain, M; Laditka, JN	INTERNATIONAL JOURNAL OF HEALTH GEOGRAPHICS	2009	10.1186/1476-072X-8-51	WOS
Utilization by Long-Term Nursing Home Residents Under Accountable Care Organizations	Chang CH, Mainor A, Colla C, Bynum J.	J Am Med Dir Assoc	2021	10.1016/j.jamda.2020.05.055	PubMed
Utilization by Long-Term Nursing Home Residents Under Accountable Care Organizations	Chang, C.-H., Mainor, A., Colla, C., Bynum, J.	Journal of the American Medical Directors Association	2021	10.1016/j.jamda.2020.05.055	Scopus
Utilization by Long-Term Nursing Home Residents Under Accountable Care Organizations	Chang, CH; Mainor, A; Colla, C; Bynum, J	JOURNAL OF THE AMERICAN MEDICAL DIRECTORS ASSOCIATION	2021	10.1016/j.jamda.2020.05.055	WOS
Vaccine-preventable admissions to an irish paediatric intensive care	Doyle, Y., Healy, M., McMahon, C., Crowe, S.	Irish Medical Journal	2017		Scopus
Variation in avoidable emergency admissions: multiple case studies of emergency and urgent care systems	O'Cathain A, Knowles E, Turner J, Hirst E, Goodacre S, Nicholl J.	J Health Serv Res Policy	2016	10.1177/1355819615596543	PubMed
Variation in avoidable emergency admissions: Multiple case studies of emergency and urgent care systems	O’Cathain, A., Knowles, E., Turner, J., Hirst, E., Goodacre, S., Nicholl, J.	Journal of Health Services Research and Policy	2016	10.1177/1355819615596543	Scopus
Variation in avoidable emergency admissions: multiple case studies of emergency and urgent care systems	O'Cathain, A; Knowles, E; Turner, J; Hirst, E; Goodacre, S; Nicholl, J	JOURNAL OF HEALTH SERVICES RESEARCH & POLICY	2016	10.1177/1355819615596543	WOS
Variation in Risk-standardized Rates and Causes of Unplanned Hospital Visits Within 7 Days of Hospital Outpatient Surgery	Desai MM, Zogg CK, Ranasinghe I, Parzynski CS, Lin Z, Gorbaty M, Merrill A, Krumholz HM, Drye EE.	Ann Surg	2020	10.1097/SLA.0000000000004627	PubMed
Variations on a theme called PACE	Kane RL, Homyak P, Bershadsky B, Flood S.	J Gerontol A Biol Sci Med Sci	2006	10.1093/gerona/61.7.689	PubMed
Variations on a theme called PACE	Kane, R.L., Homyak, P., Bershadsky, B., Flood, S.	Journals of Gerontology - Series A Biological Sciences and Medical Sciences	2006	10.1093/gerona/61.7.689	Scopus
Variations on a theme called PACE	Kane, RL; Homyak, P; Bershadsky, B; Flood, S	JOURNALS OF GERONTOLOGY SERIES A-BIOLOGICAL SCIENCES AND MEDICAL SCIENCES	2006	10.1093/gerona/61.7.689	WOS
Venous thromboembolism: A common and preventable condition: Implications for the home care nurse	Gorski, L.A.	Home Healthcare Nurse	2007	10.1097/00004045-200702000-00009	Scopus
VETERANS' CARE NEEDS AFTER EMERGENCY DEPARTMENT VISITS FOR AMBULATORY CARE SENSITIVE CONDITIONS	Cordasco, KM; Yuan, AH; Aoki, K; Ganz, D	JOURNAL OF GENERAL INTERNAL MEDICINE	2020		WOS
Visual problems in children	Pratt-Johnson JA.	Can Fam Physician	1977		PubMed
Waiting times and hospitalizations for ambulatory care sensitive conditions	Prentice, J.C., Pizer, S.D.	Health Services and Outcomes Research Methodology	2008	10.1007/s10742-007-0024-5	Scopus
Well-baby care in Connecticut's Medicaid managed-care program	Lee MA, Learned A.	Conn Med	2002		PubMed
Well-baby care in Connecticut's Medicaid managed-care program	Lee, M.A., Learned, A.	Connecticut Medicine	2002		Scopus
Well-child care in infancy and emergency department use by South Carolina Medicaid children birth to 6 years old	Pittard WB 3rd.	South Med J	2011	10.1097/SMJ.0b013e31822426c0	PubMed
Well-child care in infancy and emergency department use by south carolina medicaid children birth to 6 years old	Pittard, W.B.	Southern Medical Journal	2011	10.1097/SMJ.0b013e31822426c0	Scopus
Well-Child Care in Infancy and Emergency Department Use by South Carolina Medicaid Children Birth to 6 Years Old	Pittard, WB	SOUTHERN MEDICAL JOURNAL	2011	10.1097/SMJ.0b013e31822426c0	WOS
Well-child care in infancy and healthcare services utilization from birth to 6 years by late preterm children receiving Medicaid benefits	Pittard WB 3rd.	South Med J	2013	10.1097/SMJ.0b013e3182826371	PubMed
Well-child care in infancy and healthcare services utilization from birth to 6 years by late preterm children receiving medicaid benefits	Pittard III, W.B.	Southern Medical Journal	2013	10.1097/SMJ.0b013e3182826371	Scopus
Well-Child Care in Infancy and Healthcare Services Utilization From Birth to 6 Years by Late Preterm Children Receiving Medicaid Benefits	Pittard, WB	SOUTHERN MEDICAL JOURNAL	2013	10.1097/SMJ.0b013e3182826371	WOS
What Are Nursing Facilities Doing to Reduce Potentially Avoidable Hospitalizations?	Daras, L.C., Wang, J.M., Ingber, M.J., Ormond, C., Khatutsky, G., Feng, Z., Breg, N.W.	Journal of the American Medical Directors Association	2017	10.1016/j.jamda.2017.02.007	Scopus
What weekday? How acute? An analysis of reported planned and unplanned GP visits by older multi-morbid patients in the Patient Journey Record System database	Surate Solaligue, D.E., Hederman, L., Martin, C.M.	Journal of Evaluation in Clinical Practice	2014	10.1111/jep.12171	Scopus
Which hospitalisations are ambulatory care-sensitive, to what degree, and how could the rates be reduced? Results of a group consensus study in Germany	Sundmacher L, Fischbach D, Schuettig W, Naumann C, Augustin U, Faisst C.	Health Policy	2015	10.1016/j.healthpol.2015.08.007	PubMed
Which hospitalisations are ambulatory care-sensitive, to what degree, and how could the rates be reduced? Results of a group consensus study in Germany	Sundmacher, L., Fischbach, D., Schuettig, W., Naumann, C., Augustin, U., Faisst, C.	Health Policy	2015	10.1016/j.healthpol.2015.08.007	Scopus
Which hospitalisations are ambulatory care-sensitive, to what degree, and how could the rates be reduced? Results of a group consensus study in Germany	Sundmacher, L; Fischbach, D; Schuettig, W; Naumann, C; Augustin, U; Faisst, C	HEALTH POLICY	2015	10.1016/j.healthpol.2015.08.007	WOS
Who knows best? Older people's and practitioner contributions to understanding and preventing avoidable hospital admissions	Glasby J, Littlechild R, Le Mesurier N, Thwaites R.	Health Econ Policy Law	2020	10.1017/S1744133118000518	PubMed
Who knows best? Older people's and practitioner contributions to understanding and preventing avoidable hospital admissions	Glasby, J., Littlechild, R., Le Mesurier, N., Thwaites, R.	Health Economics, Policy and Law	2020	10.1017/S1744133118000518	Scopus
Who knows best? Older people's and practitioner contributions to understanding and preventing avoidable hospital admissions	Glasby, J; Littlechild, R; Le Mesurier, N; Thwaites, R	HEALTH ECONOMICS POLICY AND LAW	2020	10.1017/S1744133118000518	WOS
Who Should Deliver Primary Care in Long-term Care Facilities to Optimize Resident Outcomes? A Systematic Review	Barker, RO; Craig, D; Spiers, G; Kunonga, P; Hanratty, B	JOURNAL OF THE AMERICAN MEDICAL DIRECTORS ASSOCIATION	2018	10.1016/j.jamda.2018.07.006	WOS
Why do older people with multi-morbidity experience unplanned hospital admissions from the community: a root cause analysis	Reed, RL; Isherwood, L; Ben-Tovim, D	BMC HEALTH SERVICES RESEARCH	2015	10.1186/s12913-015-1170-z	WOS
Wide Variability in Emergency Physician Admission Rates: A Target to Reduce Costs Without Compromising Quality	Guterman JJ, Lundberg SR, Scheib GP, Gross-Schulman SG, Richman MJ, Wang CJ, Talan DA.	West J Emerg Med	2016	10.5811/westjem.2016.7.30832	PubMed
Wide variability in emergency physician admission rates: A target to reduce costs without compromising quality	Jeffrey, J.G., Lundberg, S.R., Scheib, G.P., Gross-Schulman, S.G., Richman, M.J., Wang, C.-J., Talan, D.A.	Western Journal of Emergency Medicine	2016	10.5811/westjem.2016.7.30832	Scopus
Wide Variability in Emergency Physician Admission Rates: A Target to Reduce Costs Without Compromising Quality	Guterman, JJ; Lundberg, SR; Scheib, GP; Gross-Schulman, SG; Richman, MJ; Wang, CJ; Talan, DA	WESTERN JOURNAL OF EMERGENCY MEDICINE	2016	10.5811/westjem.2016.7.30832	WOS
Wisconsin experience indicates that expanding public insurance to low-income childless adults has health care impacts	DeLeire T, Dague L, Leininger L, Voskuil K, Friedsam D.	Health Aff (Millwood)	2013	10.1377/hlthaff.2012.1026	PubMed
Wisconsin experience indicates that expanding public insurance to low-income childless adults has health care impacts	DeLeire, T., Dague, L., Leininger, L., Voskuil, K., Friedsam, D.	Health Affairs	2013	10.1377/hlthaff.2012.1026	Scopus
Wisconsin Experience Indicates That Expanding Public Insurance To Low-Income Childless Adults Has Health Care Impacts	DeLeire, T; Dague, L; Leininger, L; Voskuil, K; Friedsam, D	HEALTH AFFAIRS	2013	10.1377/hlthaff.2012.1026	WOS
Withholding and termination of resuscitation of adult cardiopulmonary arrest secondary to trauma: resource document to the joint NAEMSP-ACSCOT position statements	Millin MG, Galvagno SM, Khandker SR, Malki A, Bulger EM; Standards and Clinical Practice Committee of the National Association of EMS Physicians (NAEMSP); Subcommittee on Emergency Services–Prehospital of the American College of Surgeons’ Committee on Trauma (ACSCOT).	J Trauma Acute Care Surg	2013	10.1097/TA.0b013e31829cfaea	PubMed
Withholding and termination of resuscitation of adult cardiopulmonary arrest secondary to trauma: Resource document to the joint NAEMSP-ACSCOT position statements	Millin, MG; Galvagno, SM; Khandker, SR; Malki, A; Bulger, EM	JOURNAL OF TRAUMA AND ACUTE CARE SURGERY	2013	10.1097/TA.0b013e31829cfaea	WOS
Withholding and termination of resuscitation of adult cardiopulmonary arrest secondary to trauma: resource document to the joint NAEMSP-ACSCOT position statements.	Millin, M.G., Galvagno, S.M., Khandker, S.R., Malki, A., Bulger, E.M.	The journal of trauma and acute care surgery	2013		Scopus
Younger Dual-Eligibles Who Use Federally Qualified Health Centers Have More Preventable Emergency Department Visits, but Some Have Fewer Hospitalizations	Potter AJ, Trivedi AN, Wright B.	J Prim Care Community Health	2017	10.1177/2150131916657081	PubMed
Younger dual-eligibles who use federally qualified health centers have more preventable emergency department visits, but some have fewer hospitalizations	Potter, A.J., Trivedi, A.N., Wright, B.	Journal of Primary Care and Community Health	2017	10.1177/2150131916657081	Scopus
Younger Dual-Eligibles Who Use Federally Qualified Health Centers Have More Preventable Emergency Department Visits, but Some Have Fewer Hospitalizations	Potter, AJ; Trivedi, AN; Wright, B	JOURNAL OF PRIMARY CARE AND COMMUNITY HEALTH	2017	10.1177/2150131916657081	WOS
